# Supplementary material for: Interconversion of Phosphinyl Radical and Phosphinidene Complexes by Proton Coupled Electron Transfer
Source: PubMed Central journal article supplement — Angew Chem Int Ed Engl. 2019 Apr 1;58(19):6338–41. doi: 10.1002/anie.201901470 (PMC6519162; doi:10.1002/anie.201901470), 2019-04-01
Supplement: ANIE-58-6338-s001.pdf [file ANIE-58-6338-s001.pdf]

Supporting Information

**Interconversion of Phosphinyl Radical and Phosphinidene Complexes  
by Proton Coupled Electron Transfer**

*Josh Abbenseth, Daniel Delony, Marc C. Neben, Christian Würtele, Bas de Bruin,\* and  
Sven Schneider\**

anie\_201901470\_sm\_miscellaneous\_information.pdf

## Supporting Information

### Author Contributions

J.A.: Synthesis: Lead; Formal Analysis: Lead; Investigation: Lead; Writing-original draft: Equal  
D.D.: ITC: Lead  
M.N.: Synthesis and Investigation: Supporting  
C.W.: Crystallography: Lead  
B.B.: EPR and BDE computations: Lead; Writing-original draft: Equal  
S.S.: Conceptualization: Lead; Funding acquisition: Lead; Methodology: Lead; Supervision: Lead, Writing-original draft: Equal

**Table of content**

|                                                                                           |    |
|-------------------------------------------------------------------------------------------|----|
| Experimental Details and Spectroscopy.....                                                | 1  |
| Materials and Methods.....                                                                | 1  |
| Syntheses .....                                                                           | 2  |
| [OsHCl(PHMe <sup>s</sup> *)(PNP)] (4) .....                                               | 2  |
| [OsH(PHMe <sup>s</sup> *)(PNP)] (5) .....                                                 | 2  |
| [OsH(PMe <sup>s</sup> *)(PNP)] (6).....                                                   | 2  |
| [Os(5,7-di- <i>tert</i> -butyl-3,3-dimethyl-2,3-dihydro-1H-phosphindole)H(PNP)] (7) ..... | 2  |
| [Os(PHMe <sup>s</sup> *)(PNP)(CO)] (8) .....                                              | 3  |
| [OsH(PHMe <sup>s</sup> *)(PNP)][Al(OR) <sub>4</sub> ] (9) .....                           | 3  |
| Spectroscopic characterization of 4 .....                                                 | 4  |
| Spectroscopic characterization of 5 .....                                                 | 6  |
| Spectroscopic characterization of 6 .....                                                 | 10 |
| Spectroscopic characterization of 7 .....                                                 | 11 |
| Spectroscopic characterization of 8 .....                                                 | 12 |
| Spectroscopic characterization of 9 .....                                                 | 14 |
| Titration Calorimetry.....                                                                | 16 |
| Crystallographic Details.....                                                             | 19 |
| X-ray Single-Crystal Structure Analysis of 4 .....                                        | 20 |
| X-ray Single-Crystal Structure Analysis of 5 .....                                        | 25 |
| X-ray Single-Crystal Structure Analysis of 8 .....                                        | 29 |
| X-ray Single-Crystal Structure Analysis of 9 .....                                        | 34 |
| Computational Details .....                                                               | 40 |
| BDE calculations .....                                                                    | 41 |
| EPR Property calculations .....                                                           | 41 |

## Experimental Details and Spectroscopy

### Materials and Methods

All experiments were carried out using Schlenk (argon atmosphere) and glovebox (argon atmosphere) techniques. All solvents were dried by passing through columns packed with activated alumina. Deuterated solvents were obtained from Euriso-Top GmbH, dried over Na/K (THF, Toluene, Benzene), distilled by trap-to-trap transfer *in vacuo*, and degassed by three freeze–pump–thaw cycles, respectively. Silica gel 60 silanized was purchased from Merck KGaA and heated at 120°C *in vacuo* for 5 days prior to use. Ag[Al(OR)<sub>4</sub>] (R = C(CF<sub>3</sub>)<sub>3</sub>, Iolitec), CoCp<sub>2</sub> (abcr), KOtBu (Sigma-Aldrich), NBu<sub>4</sub>PF<sub>6</sub> (Sigma-Aldrich), PH<sub>2</sub>Mes\* (Sigma-Aldrich) were used as purchased. CO (Linde) was cooled to -80°C in metal tubings for 2h prior to use. TEMPO (Sigma-Aldrich) was sublimed prior to use. **3** and 2,4,6-tri-tert-butylphenoxyradical (Mes\*O) were prepared according to literature procedures.<sup>[1]</sup> IR spectra were recorded with a Thermo Scientific Nicolet iZ10 FT/IR spectrometer at room temperature. Elemental analyses were obtained from the analytical laboratories at the University of Göttingen with an Elementar Vario EL 3 analyzer. NMR Spectra were recorded with a Bruker Avance III HD 500 NMR spectrometer and were calibrated to the residual solvent proton resonance (C<sub>6</sub>D<sub>6</sub> δ<sub>H</sub> = 7.16 ppm, THF-d<sub>8</sub> δ<sub>H</sub> = 3.58 ppm). Magnetic moments in solution (C<sub>6</sub>D<sub>6</sub>) were determined at room temperature by Evans' method as modified by Sur and corrected for diamagnetic contribution.<sup>[2]</sup> LIFDI mass spectrometry was performed using a Joel AccuTOF spectrometer under inert conditions. Cyclic voltammograms were recorded with a Metrohm Autolab PGSTAT101 using Ag/Ag<sup>+</sup> reference, glassy-carbon working and Pt-wire counter electrodes. Experimental X-band EPR spectra were recorded with a Bruker ELEXSYS-II E500 CW-EPR spectrometer. The spectra were simulated by iteration of the anisotropic g-values, (super)hyperfine coupling constants, and line widths using the EPR-simulation program W95EPR.<sup>[3]</sup> Experimental details for the isothermal titration calorimetry are presented in the respective chapter.

## Syntheses

**[OsCl<sub>2</sub>(PHMes\*)H(PNP)] (4)**

[OsCl<sub>2</sub>(PNP)] (42.5 mg, 68.8 μmol, 1.0 eq.) and CoCp<sub>2</sub> (13.1 mg, 69.3 μmol, 1.0 eq.) are dissolved in Et<sub>2</sub>O (5 mL) and stirred for 1 min at room temperature. PH<sub>2</sub>Mes\* (19.2 mg, 68.8 μmol, 1.0 eq) is added and stirring is continued for 2h. After filtration the solvent is evaporated and the crude product is extracted with pentane (10 x 3 mL). The solution is concentrated and stored at -40°C for 3 days. The solvent is decanted off and the solid is washed with cold pentane. After extraction with benzene (3 x 5 mL), lyophilization yields **4** as a blue powder (42.8 mg, 49.7 μmol, 72%).

Anal. Calcd for C<sub>38</sub>H<sub>71</sub>ClNOsP<sub>3</sub> (860.58): C, 53.04; H, 8.32; N, 1.63 Found: C, 53.54; H, 7.82; N, 1.45. NMR (THF-d<sub>6</sub>, -30°C): <sup>1</sup>H (500 MHz): δ = 18.5 (d, <sup>1</sup>J<sub>HP</sub> = 337.2 Hz, 1H, PHMes\*), 7.34 (d, <sup>4</sup>J<sub>HH</sub> = 1.93 Hz, 1H, C<sub>meta</sub>H, Mes\*), 7.26 (d, <sup>4</sup>J<sub>HH</sub> = 1.93 Hz, 1H, C<sub>meta</sub>H, Mes\*), 6.82 – 6.70 (m, 2 H, NCHCHP), 4.35 (m, <sup>3</sup>J<sub>HH</sub> = 6.0 Hz, 1H, NCHCHP), 4.14 (m, <sup>3</sup>J<sub>HH</sub> = 6.0 Hz, 1H, NCHCHP), 1.64 (d, <sup>3</sup>J<sub>HP</sub> = 10.5 Hz, 9H, PC(CH<sub>3</sub>)<sub>3</sub>), 1.45 (d, <sup>3</sup>J<sub>HP</sub> = 9.8 Hz, 9H, PC(CH<sub>3</sub>)<sub>3</sub>), 1.36 (s, 9H, C<sub>ortho</sub>C(CH<sub>3</sub>)<sub>3</sub>, Mes\*), 1.34 (s, 9H, C<sub>ortho</sub>C(CH<sub>3</sub>)<sub>3</sub>, Mes\*), 1.30 (s, 9H, C<sub>para</sub>C(CH<sub>3</sub>)<sub>3</sub>, Mes\*), 1.17 (d, <sup>3</sup>J<sub>HP</sub> = 10.7 Hz, 9H, PC(CH<sub>3</sub>)<sub>3</sub>), 1.00 (d, <sup>3</sup>J<sub>HP</sub> = 9.7 Hz, 9H, PC(CH<sub>3</sub>)<sub>3</sub>), -5.37 (m, 1H, OsH). <sup>13</sup>C{<sup>1</sup>H} (125.76 MHz): δ = 162.8 (dd, <sup>2</sup>J<sub>CP</sub> = 11.5 Hz, <sup>3</sup>J<sub>CP</sub> = 4.7 Hz, 1C, NCHCHP), 162.1 (dd, <sup>2</sup>J<sub>CP</sub> = 10.4 Hz, <sup>3</sup>J<sub>CP</sub> = 3.8 Hz, 1C, NCHCHP), 153.9 (s, 1C, C<sub>ortho</sub>, Mes\*), 152.6 (s, 1C, C<sub>ortho</sub>, Mes\*), 148.9 (s, 1C, C<sub>para</sub>, Mes\*), 146.4 (br, 1C, C<sub>ipso</sub>, Mes\*), 125.5 (s, 1C, C<sub>meta</sub>, Mes\*), 123.1 (s, 1C, C<sub>meta</sub>, Mes\*), 93.9 (m, <sup>1</sup>J<sub>CP</sub> = 31.5 Hz, <sup>3</sup>J<sub>CP</sub> = 7.3 Hz, 1C, NCHCHP), 92.6 (m, <sup>1</sup>J<sub>CP</sub> = 34.5 Hz, <sup>3</sup>J<sub>CP</sub> = 4.9 Hz, 1C, NCHCHP), 42.8 (dd, <sup>1</sup>J<sub>CP</sub> = 14.3 Hz, <sup>3</sup>J<sub>CP</sub> = 7.7 Hz, 1C, PC(CH<sub>3</sub>)<sub>3</sub>), 40.7 (s, 1C, C<sub>para</sub>C(CH<sub>3</sub>)<sub>3</sub>, Mes\*) 40.0 (s, 1C, C<sub>ortho</sub>C(CH<sub>3</sub>)<sub>3</sub>, Mes\*), 39.6 (dd, <sup>1</sup>J<sub>CP</sub> = 13.6 Hz, <sup>3</sup>J<sub>CP</sub> = 6.5 Hz, 1C, PC(CH<sub>3</sub>)<sub>3</sub>), 38.8 (dd, <sup>1</sup>J<sub>CP</sub> = 21.4 Hz, <sup>3</sup>J<sub>CP</sub> = 6.1 Hz, 1C, PC(CH<sub>3</sub>)<sub>3</sub>), 35.9 (dd, <sup>1</sup>J<sub>CP</sub> = 19.0 Hz, <sup>3</sup>J<sub>CP</sub> = 6.0 Hz, 1C, PC(CH<sub>3</sub>)<sub>3</sub>), 35.6 (s, 1C, C<sub>ortho</sub>C(CH<sub>3</sub>)<sub>3</sub>, Mes\*), 33.7 (br, 3C, PC(CH<sub>3</sub>)<sub>3</sub>), 33.5 (br, 3C, PC(CH<sub>3</sub>)<sub>3</sub>), 33.2 (s, 3C, C<sub>ortho</sub>C(CH<sub>3</sub>)<sub>3</sub>), 32.8 (s, 3C, C<sub>para</sub>C(CH<sub>3</sub>)<sub>3</sub>), 31.6 (s, 3C, C<sub>ortho</sub>C(CH<sub>3</sub>)<sub>3</sub>), 31.5–30.8 (br, 6C, PC(CH<sub>3</sub>)<sub>3</sub>). <sup>31</sup>P{<sup>1</sup>H} (161.25 MHz): δ = 103.9 (m, 1P, PHMes\*), 31.6 (dd, <sup>2</sup>J<sub>PP</sub> = 259.8 Hz, <sup>2</sup>J<sub>PP</sub> = 20.1 Hz, 1P, PC(CH<sub>3</sub>)<sub>3</sub>), 30.0 (dd, <sup>2</sup>J<sub>PP</sub> = 259.8 Hz, <sup>2</sup>J<sub>PP</sub> = 18.3 Hz, 1P, PC(CH<sub>3</sub>)<sub>3</sub>). IR (Nujol, cm<sup>-1</sup>): 2349 (ν<sub>P-H</sub>). LIFDI-MS (toluene, m/z): 861.5 (39%, [M]<sup>+</sup>), 825.5 (100%, [M-HCl]<sup>+</sup>).

**[Os(PHMes\*)H(PNP)] (5)**

**Route A:** **4** (30 mg, 34.9 μmol, 1.0 eq) and CoCp<sub>2</sub> (6.6 mg, 34.9 μmol, 1.0 eq) are dissolved in pentane (3 mL) and stirred for 5 minutes at room temperature. After filtration and extraction of the residue with pentane (3 x 1 mL) the solvent is evaporated. After column chromatography (silanized silica, pentane), the solvent is evaporated. **5** is obtained after lyophilization as a dark green powder (23 mg, 27.9 μmol, 80%).

Anal. Calcd for C<sub>38</sub>H<sub>71</sub>NOsP<sub>3</sub> (825.1): C, 55.1; H, 8.53; N, 1.68 Found: C, 54.9; H, 8.65; N, 1.65. IR (Nujol, cm<sup>-1</sup>): 2345 (ν<sub>P-H</sub>), 2180 (ν<sub>Os-H</sub>). LIFDI-MS (toluene, m/z): 826.4 (100%, [M]<sup>+</sup>).

**Route B:** [OsCl<sub>2</sub>(PNP)] (35 mg, 56.7 μmol, 1.0 eq) and CoCp<sub>2</sub> (21.4 mg, 113.3 μmol, 2.0 eq) are dissolved in C<sub>6</sub>H<sub>6</sub> (3 mL) and stirred for 2 minutes at room temperature. PH<sub>2</sub>Mes\* (15.8 mg, 56.7 μmol, 1.0 eq) is added and stirring is continued for additional 4 hours. The solvent is removed and the crude product is extracted with pentane (5 x 1 mL) and the solvent is evaporated. After column chromatography (silanized silica, pentane), the solvent is evaporated. Lyophilization yields **5** as a dark green powder (41.8 mg, 50.7 μmol, 89%).

Anal. Calcd for C<sub>38</sub>H<sub>71</sub>NOsP<sub>3</sub> (825.1): C, 55.3; H, 8.67; N, 1.70 Found: C, 54.9; H, 8.65; N, 1.65. IR (Nujol, cm<sup>-1</sup>): 2345 (ν<sub>P-H</sub>), 2180 (ν<sub>Os-H</sub>). LIFDI-MS (toluene, m/z): 826.4 (100%, [M]<sup>+</sup>). μ<sub>eff</sub><sup>298K</sup> = 1.51 μ<sub>B</sub>

**[Os(PMes\*)H(PNP)] (6)**

**Route A:** **5** (10.0 mg, 12.1 μmol, 1.0 eq) and TEMPO (5.7 mg, 38.4 μmol, 3.0 eq) are dissolved in pentane and stirred for 10 minutes at room temperature. After column chromatography (silanized silica, pentane) and removal of the solvent, **7** is obtained as a violet powder (9.0 mg, 10.9 μmol, 90%).

NMR (THF-d<sub>6</sub>, -30°C): <sup>1</sup>H (500 MHz): δ = 7.36 (d, <sup>4</sup>J<sub>HH</sub> = 1.8 Hz, 1H, C<sub>meta</sub>H), 7.23 (m, <sup>3</sup>J<sub>HH</sub> = 6.1 Hz, 2H, NCH), 7.03 (d, <sup>4</sup>J<sub>HH</sub> = 1.8 Hz, 1H, C<sub>meta</sub>H), 4.63 (m, <sup>3</sup>J<sub>HH</sub> = 5.0 Hz, 2H, PCH), 1.55 (s, 9H, C<sub>ortho</sub>C(CH<sub>3</sub>)<sub>3</sub>), 1.35 (s, 9H, C<sub>ortho</sub>C(CH<sub>3</sub>)<sub>3</sub>), 1.34 (s, 9H, C<sub>para</sub>C(CH<sub>3</sub>)<sub>3</sub>), 1.22 (br, 18H, PC(CH<sub>3</sub>)<sub>3</sub>), 1.20 (br, 18H, PC(CH<sub>3</sub>)<sub>3</sub>), -15.91 (t, <sup>2</sup>J<sub>HP</sub> = 14.5 Hz, 1H, OsH). <sup>31</sup>P{<sup>1</sup>H} (161.25 MHz): δ = 825.1 (t, <sup>2</sup>J<sub>PP</sub> = 36.6 Hz, 1P, PH), 43.2 (d, <sup>2</sup>J<sub>PP</sub> = 36.6 Hz, 2P, PC(CH<sub>3</sub>)<sub>3</sub>). LIFDI-MS (toluene, m/z): 825.5 (100%, [M]<sup>+</sup>).

**Route B:** **5** (10 mg, 12.1 μmol, 1.0 eq) is dissolved in THF (1 mL) and cooled to -80°C. Ag[Al(O<sup>-t</sup>Bu-F<sub>9</sub>)<sub>4</sub>] (13 mg, 12.1 μmol, 1.0 eq) is added and the solution is stirred for 30 seconds. KOtBu (1.4 mg, 1.0 μmol, 1.0 eq) is added and stirring is continued for three minutes. After evaporation of the solvent the crude product is extracted with pentane and purified by chromatography (silanized silica, pentane). NMR spectra (-30°C) were identical with spectra of the product obtained by route A.

**[Os(5,7-di-tert-butyl-3,3-dimethyl-2,3-dihydro-1H-phosphindole)H(PNP)] (7)**

Complex **6** prepared by route A is dissolved in benzene-d<sub>6</sub> (0.5 mL), transferred to a J-Young NMR tube and stirred at room temperature until complete conversion of **6** is detected by NMR. Lyophilization yields a brown powder as a mixture of the two diastereomers of **7** in a ratio about 60 (**A**) : 40 (**B**) according to NMR spectroscopy.

Anal. Calcd for C<sub>39</sub>H<sub>70</sub>NOOsP<sub>3</sub> (825.1): C, 55.4; H, 8.56; N, 1.70 Found: C, 55.5; H, 8.63; N, 1.68. LIFDI-MS (toluene, m/z): 825.5 (100%, [M]<sup>+</sup>). NMR (**A**, C<sub>6</sub>D<sub>6</sub>, RT): <sup>1</sup>H (500 MHz): δ = 8.34 (m, <sup>1</sup>J<sub>HP</sub> = 308.7 Hz, <sup>3</sup>J<sub>HP</sub> = 9.14, <sup>3</sup>J<sub>HP</sub> = 4.67, PH), 7.55–7.40 (m, 3H, NCH, C<sub>meta</sub>H), 7.18–7.15 (m, 1H, C<sub>meta</sub>H), 4.52–4.44 (m, 2H, PCH), 2.92–2.85 (m, 1H, PCH<sub>2</sub>C(CH<sub>3</sub>)<sub>2</sub>), 2.69–2.63 (m, 1H, PCH<sub>2</sub>C(CH<sub>3</sub>)<sub>2</sub>), 1.71 (s, 9H, C<sub>ortho</sub>C(CH<sub>3</sub>)<sub>3</sub>), 1.64 (m, 3H, PCH<sub>2</sub>C(CH<sub>3</sub>)<sub>2</sub>), 1.49 (d, <sup>2</sup>J<sub>HP</sub> = 12.4 Hz, 9H, PC(CH<sub>3</sub>)<sub>3</sub>), 1.32 (s, 9H, C<sub>para</sub>C(CH<sub>3</sub>)<sub>3</sub>), 1.25 (d, <sup>2</sup>J<sub>HP</sub> = 12.1 Hz, 9H, PC(CH<sub>3</sub>)<sub>3</sub>), 1.14 (m, 3H, PCH<sub>2</sub>C(CH<sub>3</sub>)<sub>2</sub>), 0.96 (d, <sup>2</sup>J<sub>HP</sub> = 12.7 Hz, 9H, PC(CH<sub>3</sub>)<sub>3</sub>), 0.93 (d, <sup>2</sup>J<sub>HP</sub> = 11.0 Hz, 9H, PC(CH<sub>3</sub>)<sub>3</sub>), -44.7 (ddd, <sup>2</sup>J<sub>HP</sub> = 18.4 Hz, <sup>2</sup>J<sub>HP</sub> = 13.1 Hz, <sup>2</sup>J<sub>HP</sub> = 13.0 Hz, OsH). <sup>31</sup>P{<sup>1</sup>H} (161.25 MHz): δ = 64.9 (dd, <sup>2</sup>J<sub>PP</sub> = 234.4 Hz, <sup>2</sup>J<sub>PP</sub> = 11.5 Hz), 53.0 (dd, <sup>2</sup>J<sub>PP</sub> = 234.4 Hz, <sup>2</sup>J<sub>PP</sub> = 10.9 Hz), -54.6 (dd, <sup>2</sup>J<sub>PP</sub> = 11.5 Hz, <sup>2</sup>J<sub>PP</sub> = 10.9 Hz). NMR (**B**, C<sub>6</sub>D<sub>6</sub>, RT): <sup>1</sup>H (500 MHz): δ = 8.43 (m, <sup>1</sup>J<sub>HP</sub> = 300.7 Hz, <sup>3</sup>J<sub>HP</sub> =

8.7,  $^3J_{HP} = 4.8$ , *PH*), 7.55–7.40 (m, 3H, *NCH*,  $C_{meta}H$ ), 7.18–7.15 (m, 1H,  $C_{meta}H$ ), 4.57–4.52 (m, 2H, *PCH*), 2.53–2.41 (m, 2H,  $PCH_2C(CH_3)_2$ ), 1.51 (s, 9H,  $C_{ortho}C(CH_3)_3$ ), 1.50 (m, 3H,  $PCH_2C(CH_3)_2$ ), 1.43 (d,  $^2J_{HP} = 11.4$  Hz, 9H,  $PC(CH_3)_3$ ), 1.41 (d,  $^2J_{HP} = 12.43$  Hz, 9H,  $PC(CH_3)_3$ ), 1.33 (s, 9H,  $C_{para}C(CH_3)_3$ ), 1.11 (d,  $^2J_{HP} = 12.6$  Hz, 9H,  $PC(CH_3)_3$ ), 1.11 (m, 3H,  $PCH_2C(CH_3)_2$ ), 0.91 (d,  $^2J_{HP} = 12.5$  Hz, 9H,  $PC(CH_3)_3$ ), -45.7 (ddd,  $^2J_{HP} = 21.4$  Hz,  $^2J_{HP} = 14.4$  Hz,  $^2J_{HP} = 14.4$  Hz,  $OsH$ ).  $^{31}P\{^1H\}$  (161.25 MHz):  $\delta = 68.0$  (dd,  $^2J_{PP} = 234.8$  Hz,  $^2J_{PP} = 10.5$  Hz), 58.0 (dd,  $^2J_{PP} = 234.8$  Hz,  $^2J_{PP} = 10.8$  Hz), -55.4 (dd,  $^2J_{PP} = 10.8$  Hz,  $^2J_{PP} = 10.5$  Hz).

### [Os(PHMes\*)(PNP)(CO)] (8)

**5** (20 mg, 24.2  $\mu$ mol, 1.0 eq) and TEMPO (11.4 mg, 72.7  $\mu$ mol, 3.0 eq) are dissolved in pentane and stirred for 10 min at room temperature. The solution is degassed by three freeze-pump-thaw cycles and one atmosphere of CO is added. The solution is stirred at -80°C for 5 minutes and the solvent is removed *i. vac.* The crude product is purified *via* column chromatography (silanized silica, pentane) and crystallized at -80°C to give **8** (16.5 mg, 19.36  $\mu$ mol, 80 %) as dark red crystals.

Anal. Calcd for  $C_{39}H_{70}NOOsP_3$  (825.1): C, 54.9; H, 8.28; N, 1.64 Found: C, 54.6; H, 8.34; N, 1.55. NMR (THF- $d_8$ ):  $^1H$  (500 MHz):  $\delta = 9.79$  (ddd,  $^1J_{PH} = 308.9$  Hz,  $^3J_{PH} = 13.3$  Hz,  $^3J_{PH} = 4.9$  Hz, 1H, *PHMes\**), 7.44 (ddd,  $^3J_{PH} = 36.6$  Hz,  $^3J_{HH} = 6.0$  Hz,  $^4J_{PH} = 1.4$  Hz, 1H, *NCH*), 7.33 (ddd,  $^3J_{PH} = 34.6$  Hz,  $^3J_{HH} = 5.9$  Hz,  $^4J_{PH} = 2.2$  Hz, 1H, *NCH*), 7.24 (m, 2H,  $C_{meta}H$ ), 4.44 (m,  $^2J_{PH} = 5.1$  Hz,  $^3J_{HH} = 6.0$  Hz,  $^4J_{PH} = 1.7$  Hz, 1H, *PCH*), 4.33 (m,  $^2J_{PH} = 5.0$  Hz,  $^3J_{HH} = 5.8$  Hz,  $^4J_{PH} = 1.8$  Hz, 1H, *PCH*), 1.62 (s, 9H,  $C_{ortho}C(CH_3)_3$ ), 1.61 (s, 9H,  $C_{ortho}C(CH_3)_3$ ), 1.51 (d,  $^3J_{PH} = 13.5$  Hz, 9H,  $PC(CH_3)_3$ ), 1.31 (d,  $^3J_{PH} = 13.0$  Hz, 9H,  $PC(CH_3)_3$ ), 1.31 (s, 9H,  $C_{para}C(CH_3)_3$ ), 1.03 (d,  $^3J_{PH} = 13.8$  Hz, 9H,  $PC(CH_3)_3$ ), 0.81 (d,  $^3J_{PH} = 13.4$  Hz, 9H,  $PC(CH_3)_3$ ).  $^{13}C\{^1H\}$  (125.76 MHz):  $\delta = 181.7$  (ddd,  $^2J_{CP} = 48.3$  Hz,  $^2J_{CP} = 6.0$ ,  $^2J_{CP} = 5.6$ , 1C, *Os-CO*), 164.9 (d,  $^2J_{CP} = 12.0$  Hz, 1C, *NCH*), 163.7 (d,  $^2J_{CP} = 11.0$  Hz, 1C, *NCH*), 155.7 (br, 1C,  $C_{ortho}$ ), 155.6 (d,  $^2J_{CP} = 4.1$  Hz, 1C,  $C_{ortho}$ ), 148.8 (d,  $^4J_{CP} = 2.2$  Hz, 1C,  $C_{para}$ ), 140.2 (d,  $^1J_{CP} = 6.1$  Hz, 1C,  $C_{ipso}$ ), 123.0 (d,  $^3J_{CP} = 5.1$  Hz, 1C,  $C_{meta}$ ), 122.2 (d,  $^3J_{CP} = 10.2$  Hz, 1C,  $C_{meta}$ ), 88.4 (dd,  $^1J_{CP} = 45.5$  Hz,  $^3J_{CP} = 3.7$  Hz, 1C, *PCH*), 86.7 (dd,  $^1J_{CP} = 46.8$  Hz,  $^3J_{CP} = 5.0$  Hz, 1C, *PCH*), 41.9 (ddd,  $^1J_{CP} = 22.0$  Hz,  $^3J_{CP} = 7.4$ ,  $^3J_{CP} = 3.1$  Hz, 1C,  $PC(CH_3)_3$ ), 40.8 (ddd,  $^1J_{CP} = 21.1$  Hz,  $^3J_{CP} = 7.5$ ,  $^3J_{CP} = 2.9$  Hz, 1C,  $PC(CH_3)_3$ ), 40.7 (s, 1C,  $C_{ortho}C(CH_3)_3$ ), 40.0 (s, 1C,  $C_{ortho}C(CH_3)_3$ ), 39.9 (dd,  $^1J_{CP} = 23.5$  Hz,  $^3J_{CP} = 2.2$ , 1C,  $PC(CH_3)_3$ ), 37.5 (dd,  $^1J_{CP} = 24.2$  Hz,  $^3J_{CP} = 2.0$ , 1C,  $PC(CH_3)_3$ ), 35.3 (s, 1C,  $C_{para}C(CH_3)_3$ ), 35.1 (s, 3C,  $C_{ortho}C(CH_3)_3$ ), 33.6 (s, 3C,  $C_{ortho}C(CH_3)_3$ ), 31.9 (s, 3C,  $C_{para}C(CH_3)_3$ ), 31.4 (d,  $^2J_{CP} = 4.9$  Hz, 3C,  $PC(CH_3)_3$ ), 31.3 (d,  $^2J_{CP} = 3.8$  Hz, 3C,  $PC(CH_3)_3$ ), 30.5 (br, 3C,  $PC(CH_3)_3$ ), 30.2 (br, 3C,  $PC(CH_3)_3$ ).  $^{31}P\{^1H\}$  (161.25 MHz):  $\delta = 66.9$  (dd,  $^2J_{PP} = 197.1$  Hz,  $^2J_{PP} = 35.4$ , 1P,  $PC(CH_3)_3$ ), 53.5 (dd,  $^2J_{PP} = 197.1$  Hz,  $^2J_{PP} = 35.3$ , 1P,  $PC(CH_3)_3$ ), 17.7 (dd,  $^2J_{PP} = 35.4$  Hz,  $^2J_{PP} = 35.3$ , 1P, *PHMes\**). IR (KBr,  $cm^{-1}$ ): 2333 ( $\nu_{P-H}$ ), 1888 ( $\nu_{CO}$ ). LIFDI-MS (toluene, m/z): 853.4 (100%,  $[M]^+$ ).

### [Os(PHMes\*)H(PNP)][Al(OR)<sub>4</sub>] (9)

**5** (10 mg, 12.1  $\mu$ mol, 1.0 eq) is dissolved in Et<sub>2</sub>O (1 mL) and cooled to -35°C. Ag[Al(O<sup>*t*</sup>-Bu-F<sub>9</sub>)<sub>4</sub>] (13 mg, 12.1  $\mu$ mol, 1.0 eq) is added and the solution is stirred for 30 seconds. After filtration the solvent is removed and the residue is extracted with Et<sub>2</sub>O (5 x 0.5 mL) at -35°C. After concentration *i. vac.* the solution is layered with pentane (5 mL) and stored at -85°C for 24 h. The solution is decanted off and the solid is washed with pentane at -30°C (5 x 1 mL). After drying *in vacuo* at -30°C, **9** is obtained as a blue solid (18 mg, 10  $\mu$ mol, 83%). NMR spectroscopic characterization shows minor decomposition products and some residual solvent (Et<sub>2</sub>O/pentane). Elemental analysis did not give reproducible data due to low thermal stability.

NMR (THF- $d_8$ , -30°C):  $^1H$  (500 MHz):  $\delta = 18.3$  (d,  $^1J_{HP} = 345.5$  Hz, 1H, *PHMes\**), 7.86–7.68 (m, 2 H, *NCHCHP*), 7.50 (d,  $^4J_{HH} = 1.83$  Hz, 1H,  $C_{meta}H$ , *Mes\**), 7.42 (d,  $^4J_{HH} = 1.893$  Hz, 1H,  $C_{meta}H$ , *Mes\**), 5.79 (m, 1H, *NCHCHP*), 5.55 (m, 1H, *NCHCHP*), 1.58 (d,  $^3J_{HP} = 14.0$  Hz, 9H,  $PC(CH_3)_3$ ), 1.52 (d,  $^3J_{HP} = 13.9$  Hz, 9H,  $PC(CH_3)_3$ ), 1.46 (s, 9H,  $C_{ortho}C(CH_3)_3$ , *Mes\**), 1.40 (s, 9H,  $C_{ortho}C(CH_3)_3$ , *Mes\**), 1.36 (s, 9H,  $C_{para}C(CH_3)_3$ , *Mes\**), 1.10–1.00 (m, 18H,  $PC(CH_3)_3$ ), -21.7 (m, 1H, *OsH*).  $^{13}C\{^1H\}$  (125.76 MHz):  $\delta = 168.2$  (m, 1C, *NCHCHP*), 167.4 (m, 1C, *NCHCHP*), 154.5 (s, 1C,  $C_{para}$ , *Mes\**), 151.6 (s, 1C,  $C_{ortho}$ , *Mes\**), 151.9 (s, 1C,  $C_{ortho}$ , *Mes\**), 143.7 (br, 1C,  $C_{ipso}$ , *Mes\**), 125.16 (br, 2C,  $C_{meta}$ , *Mes\**), 122.3 (q,  $^1J_{CF} = 291.8$  Hz, 12C, CF<sub>3</sub>), 110.0–108.9 (m, 2C, *NCHCHP*), 79.9 (br, 4C, CCF<sub>3</sub>), 40.8 (s, 1C,  $C_{ortho}C(CH_3)_3$ ), 40.3 (d,  $^1J_{CP} = 21.6$  Hz, 1C,  $PC(CH_3)_3$ ), 40.1 (s, 1C,  $C_{ortho}C(CH_3)_3$ ), 38.2 (d,  $^1J_{CP} = 21.3$  Hz, 1C,  $PC(CH_3)_3$ ), 37.73 (d,  $^1J_{CP} = 22.7$  Hz, 1C,  $PC(CH_3)_3$ ), 35.8 (s, 1C,  $C_{para}C(CH_3)_3$ ), 34.7 (d,  $^1J_{CP} = 22.4$  Hz, 1C,  $PC(CH_3)_3$ ), 33.8 (s, 3C,  $C_{ortho}C(CH_3)_3$ ), 33.6 (s, 3C,  $C_{ortho}C(CH_3)_3$ ), 31.4 (s, 3C,  $C_{para}C(CH_3)_3$ ), 30.9 (br, 3C,  $PC(CH_3)_3$ ), 30.7 (br, 3C,  $PC(CH_3)_3$ ), 30.0 (br, 3C,  $PC(CH_3)_3$ ), 29.3 (br, 3C,  $PC(CH_3)_3$ ).  $^{31}P\{^1H\}$  (161.25 MHz):  $\delta = 169.2$  (m, 1P, *PHMes\**), 61.5 (dd,  $^2J_{PP} = 224.0$  Hz,  $^2J_{PP} = 18.0$  Hz, 1P,  $PC(CH_3)_3$ ), 52.28 (dd,  $^2J_{PP} = 224.0$  Hz,  $^2J_{PP} = 14.2$  Hz, 1P,  $PC(CH_3)_3$ ). IR (Nujol,  $cm^{-1}$ ): 2350 ( $\nu_{P-H}$ ). LIFDI-MS (THF, m/z): 826.4 (100%,  $[M]^+$ ).

Spectroscopic characterization of **4**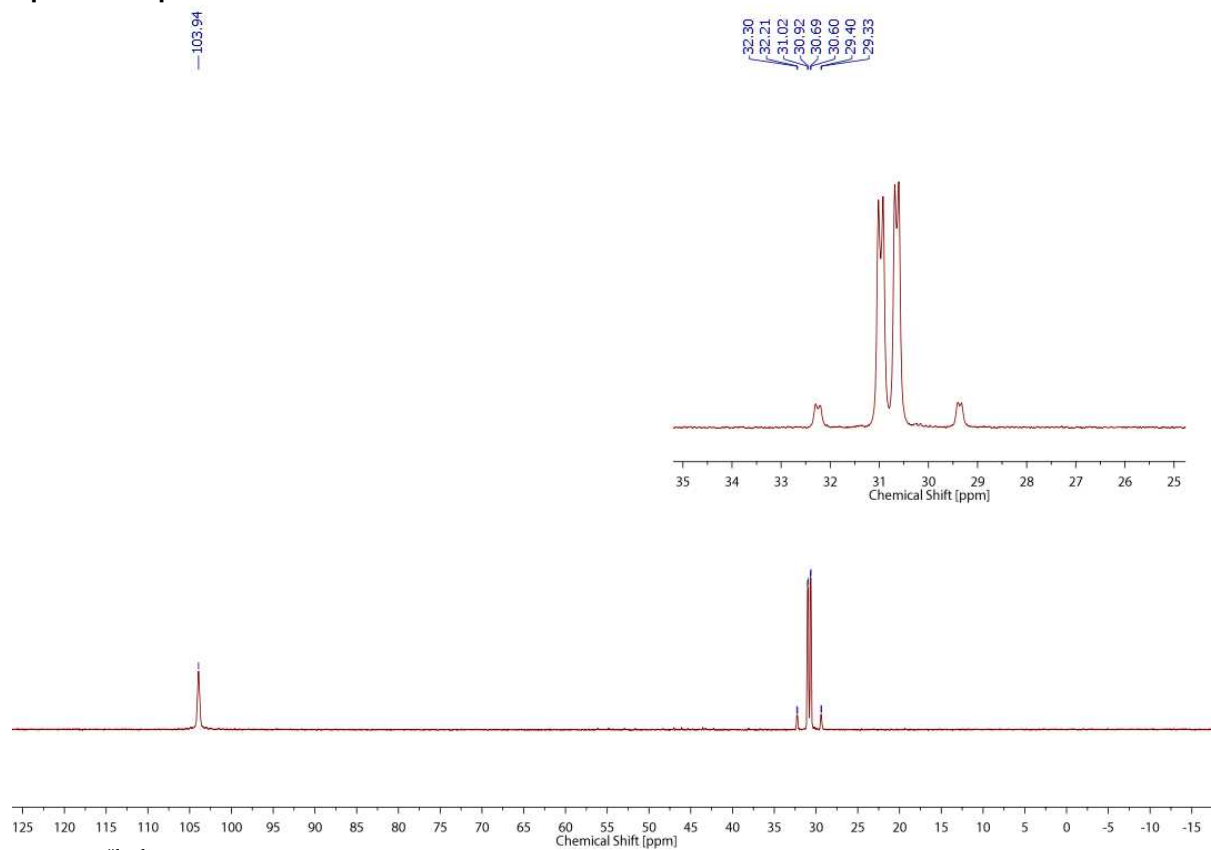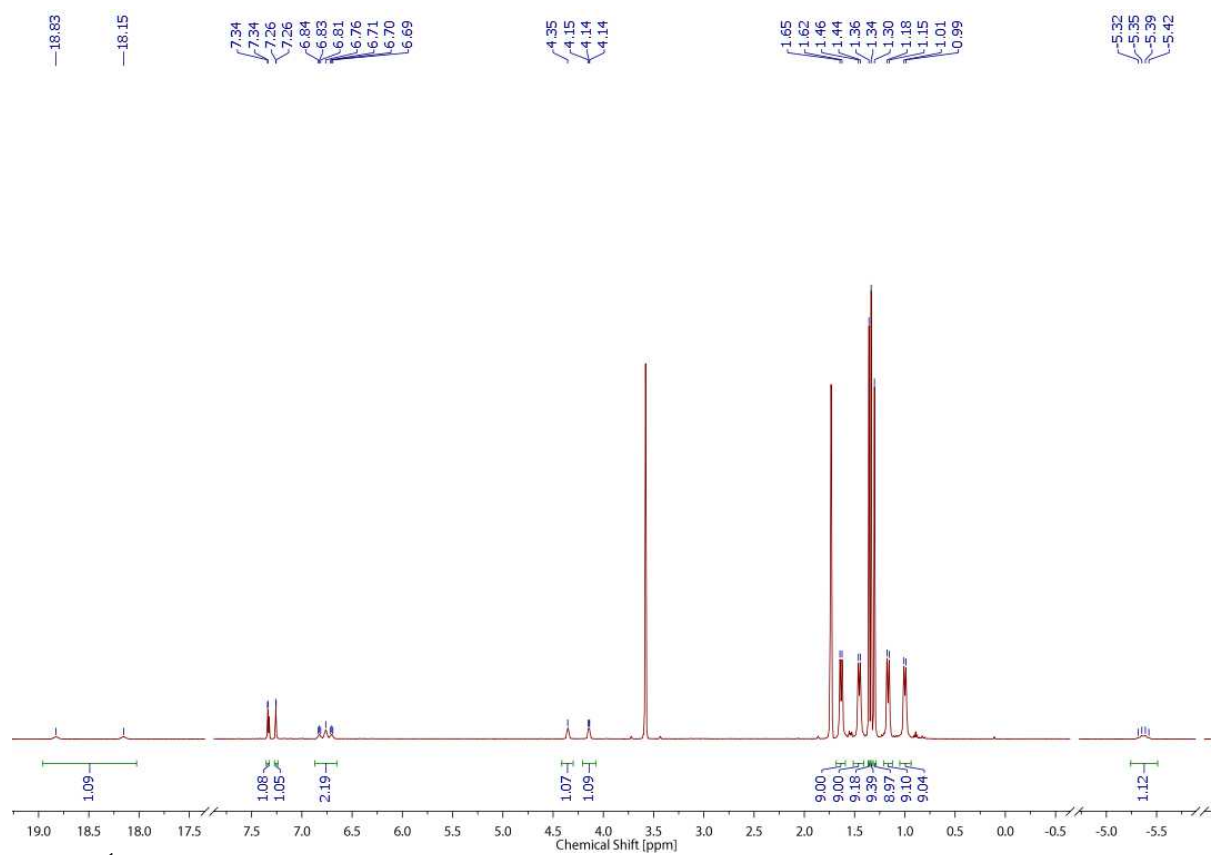

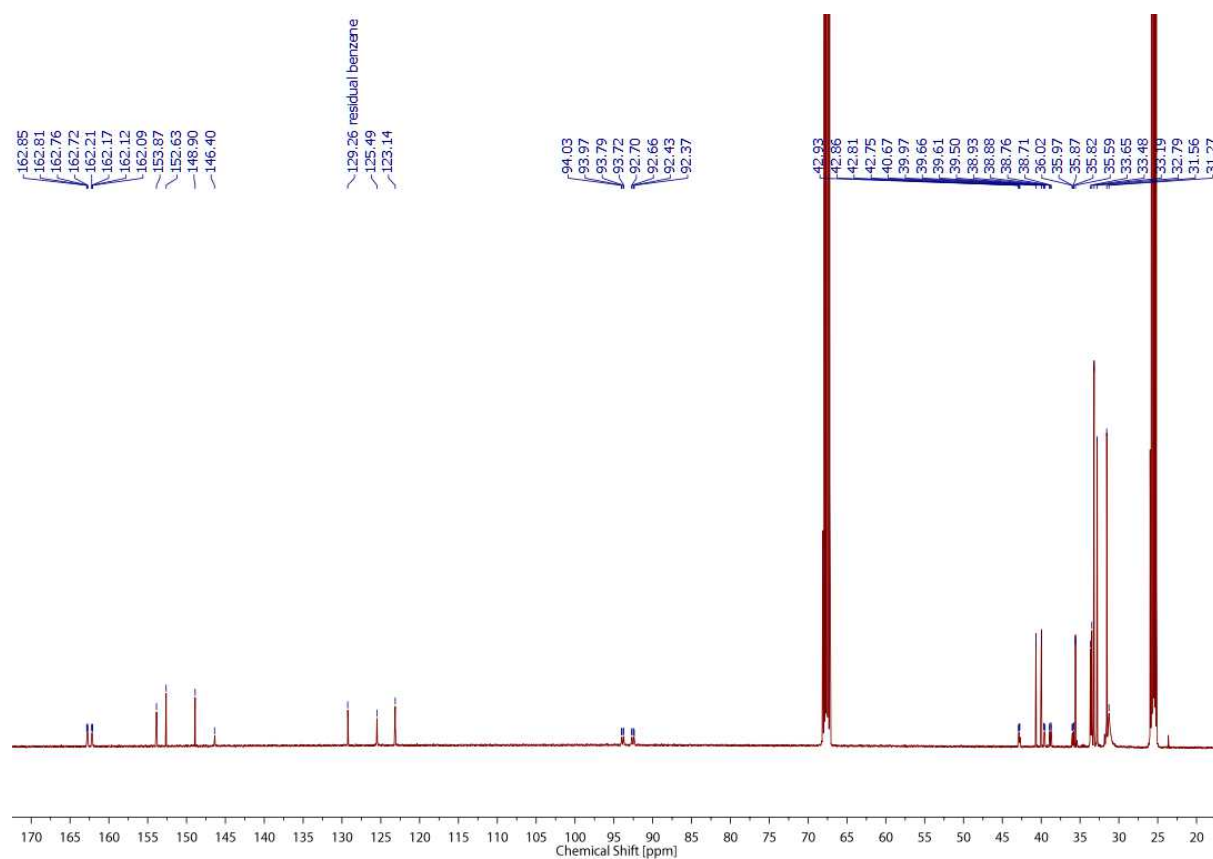

Figure S3.  $^{13}\text{C}\{^1\text{H}\}$  NMR spectrum of **4**, THF- $d_8$ ,  $-30^\circ\text{C}$ .

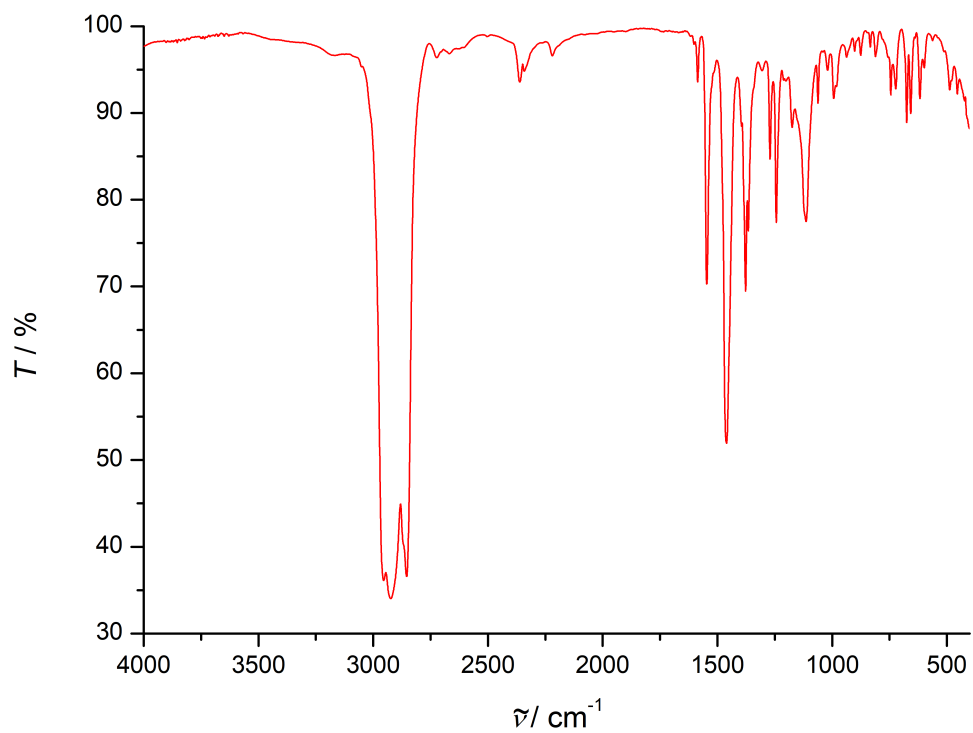

Figure S4. IR spectrum of **4**, Nujol, RT.



Spectroscopic characterization of **5**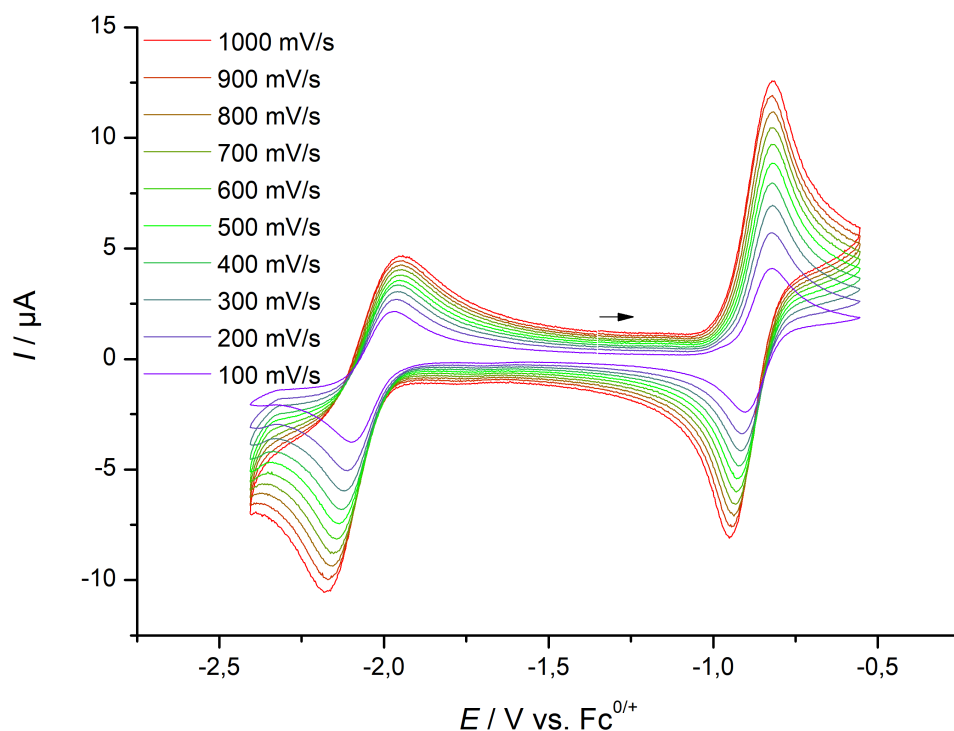

**Figure S5.** Cyclic voltammogram of **5**, 2<sup>nd</sup> scan, 1 mM, 0.1 M NBu<sub>4</sub>PF<sub>6</sub>, THF, RT.

The EPR spectrum of complex **5** is shown in Figure S6. The spectrum reveals fully resolved <sup>31</sup>P hyperfine interactions (HFI) and partially resolved <sup>189</sup>Os (16% natural abundance) HFI satellites. Simulation of the spectrum assuming coaxial g- and <sup>31</sup>P hyperfine A-tensors (W95EPR) yields <sup>31</sup>P hyperfine values (Figure S6) that deviate largely from the DFT calculated ones (Table S1).

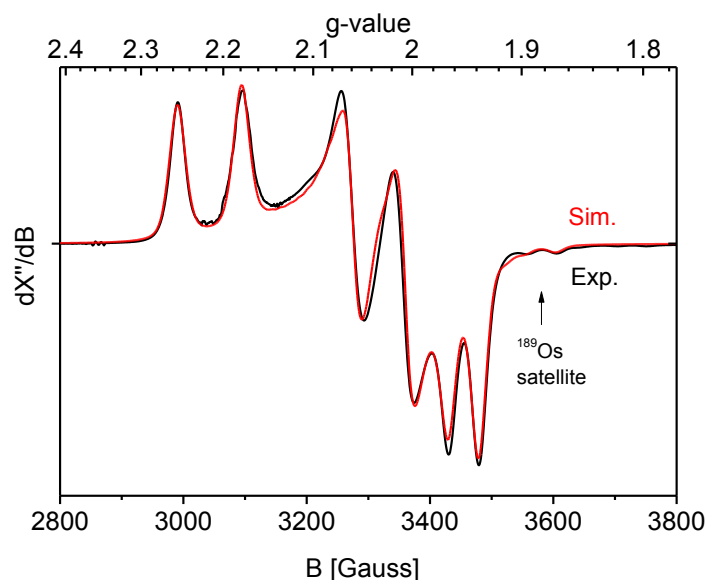

**Figure S6.** EPR spectrum of **5** (red), toluene, 148 K, 9.436620 GHz, simulation assuming coaxial g- and <sup>31</sup>P A-tensors (blue):  $g_{11} = 2.215$ ,  $g_{22} = 2.032$ ,  $g_{33} = 1.951$ ,  $A_{11}({}^{31}\text{P}) = 322$  MHz,  $A_{22}({}^{31}\text{P}) = 243$  MHz,  $A_{33}({}^{31}\text{P}) = 136$  MHz,  $A_{11}({}^{189}\text{Os}) = 230$  MHz,  $A_{22}({}^{189}\text{Os})$  and  $A_{33}({}^{189}\text{Os})$  not resolved.

However, closer inspection of the DFT calculated EPR parameters reveals that the g-tensor of complex **5** is strongly tilted with respect to the molecular symmetry axes (Figure S7). This is most likely caused by predominant spin orbit coupling involving the SOMO and HOMO of **5** along these g-tensor axes.

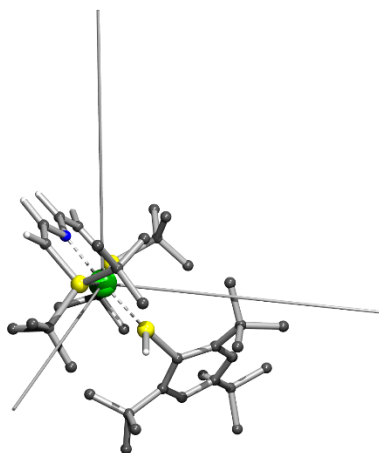

**Figure S7.** The electronic g-tensor directions of complex **5** are strongly tilted w.r.t. the molecular symmetry axes of the molecule.

In contrast, the  $^{31}\text{P}$  hyperfine A-tensor is closely aligned with the molecular symmetry axes (Figure S8). In combination with the abovementioned strongly tilted g-tensor directions w.r.t. the molecular symmetry axes, the g- and A-tensors of complex **5** are not coaxial (Figure S9), with large DFT computed Euler angles of  $\alpha = -74.3^\circ$ ,  $\beta = +142.7^\circ$  and  $\gamma = -7.5^\circ$ .

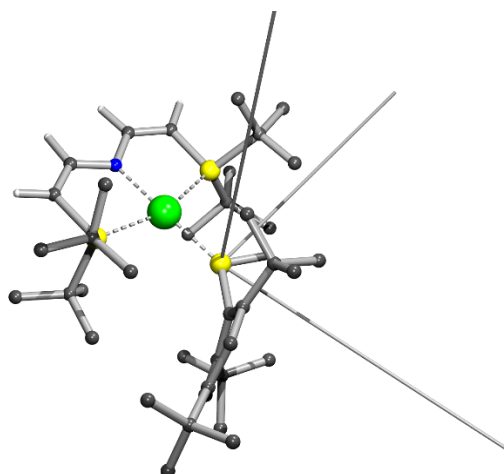

**Figure S8.** The phosphorus hyperfine A-tensor directions of complex **5** do follow the molecular symmetry axes of the molecule.

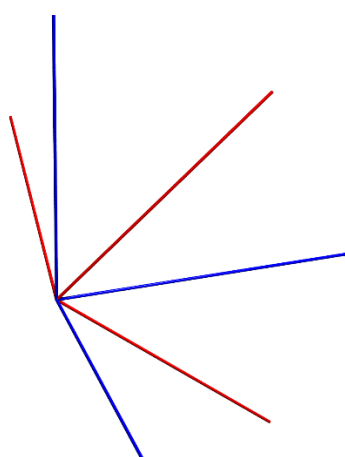

Computed tensor directions:

g =

|         |         |         |
|---------|---------|---------|
| -0.2268 | 0.7015  | 0.6756  |
| 0.4804  | 0.6840  | -0.5489 |
| 0.8472  | -0.2001 | 0.4922  |

A =

|         |         |         |
|---------|---------|---------|
| 0.1790  | -0.0050 | -0.9838 |
| 0.6619  | 0.7405  | 0.1167  |
| -0.7279 | 0.6721  | -0.1359 |

**Figure S9.** The g-tensor (blue) and A-tensor (red) of complex **5** are not coaxial, with DFT computed Euler angles of  $\alpha = -74.3^\circ$ ,  $\beta = +142.7^\circ$  and  $\gamma = -7.5^\circ$ .

Similarly, the  $^{189}\text{Os}$  hyperfine interaction (HFI) tensor (16% natural abundance; HFI tensor roughly aligned along the symmetry axes of the molecule) is rotated with respect to the electronic g-tensor, with computed Euler angles of  $\alpha = +90.5^\circ$ ,  $\beta = +51.7^\circ$  and  $\gamma = +106.5^\circ$ .

It is therefore clear that the experimental spectrum needs to be simulated using non-coaxial g- and A-tensors, the thus obtained simulation provides an excellent fit with g- and A-tensor values and Euler angles that closely match the DFT calculated EPR parameters (Figure S10, Table S1).

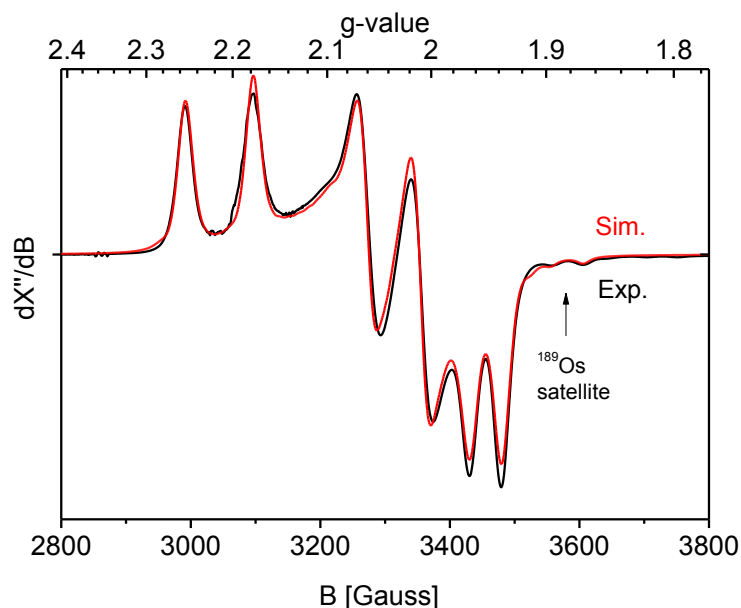

**Figure S10.** EPR spectrum of **5** (black), toluene, 148K, 9.436620 GHz, simulation using non-coaxial g- and  $^{31}\text{P}$  A-tensors (red) using parameters shown in Table S1.

**Table S1.** Experimental<sup>[a]</sup> and DFT calculated<sup>[b]</sup> EPR parameters of **5**.

|                                                | Exp. <sup>[a]</sup>    | DFT <sup>[b]</sup> |
|------------------------------------------------|------------------------|--------------------|
| <i>Electronic g-tensor</i>                     |                        |                    |
| $g_{11}$                                       | 1.9515                 | 1.9510             |
| $g_{22}$                                       | 2.0340                 | 2.0240             |
| $g_{33}$                                       | 2.2140                 | 2.2300             |
| <i><math>^{31}\text{P}</math> HFI tensor</i>   |                        |                    |
| $A_{11}^{31\text{P}}$                          | +57 MHz <sup>[d]</sup> | +57.5 MHz          |
| $A_{22}^{31\text{P}}$                          | +107 MHz               | +94.8 MHz          |
| $A_{33}^{31\text{P}}$                          | +440 MHz               | +440.8 MHz         |
| $\alpha^{31\text{P}}$ [c]                      | -72                    | -74.3              |
| $\beta^{31\text{P}}$ [c]                       | +137                   | +142.7             |
| $\gamma^{31\text{P}}$ [c]                      | -7.5                   | -7.5               |
| <i><math>^{189}\text{Os}</math> HFI tensor</i> |                        |                    |
| $A_{11}^{189\text{Os}}$                        | -240 MHz               | -277.0 MHz         |
| $A_{22}^{189\text{Os}}$                        | NR <sup>[e]</sup>      | -36.9 MHz          |
| $A_{33}^{189\text{Os}}$                        | NR <sup>[e]</sup>      | +16.0 MHz          |
| $\alpha^{189\text{Os}}$ [c]                    | +90                    | +90.5              |
| $\beta^{189\text{Os}}$ [c]                     | +45                    | +51.7              |
| $\gamma^{189\text{Os}}$ [c]                    | +107                   | +106.5             |

<sup>[a]</sup> Derived from spectral simulation.

<sup>[b]</sup> ADF, B3LYP, all electron ZORA/QZ4P, unrestricted, collinear, spinorbit.

<sup>[c]</sup> Euler angles.

<sup>[d]</sup>  $A_{11}^{31\text{P}}$  is poorly resolved with these Euler angles (varying  $\pm 50$  MHz still gives a decent fit).

<sup>[e]</sup> NR = not resolved.

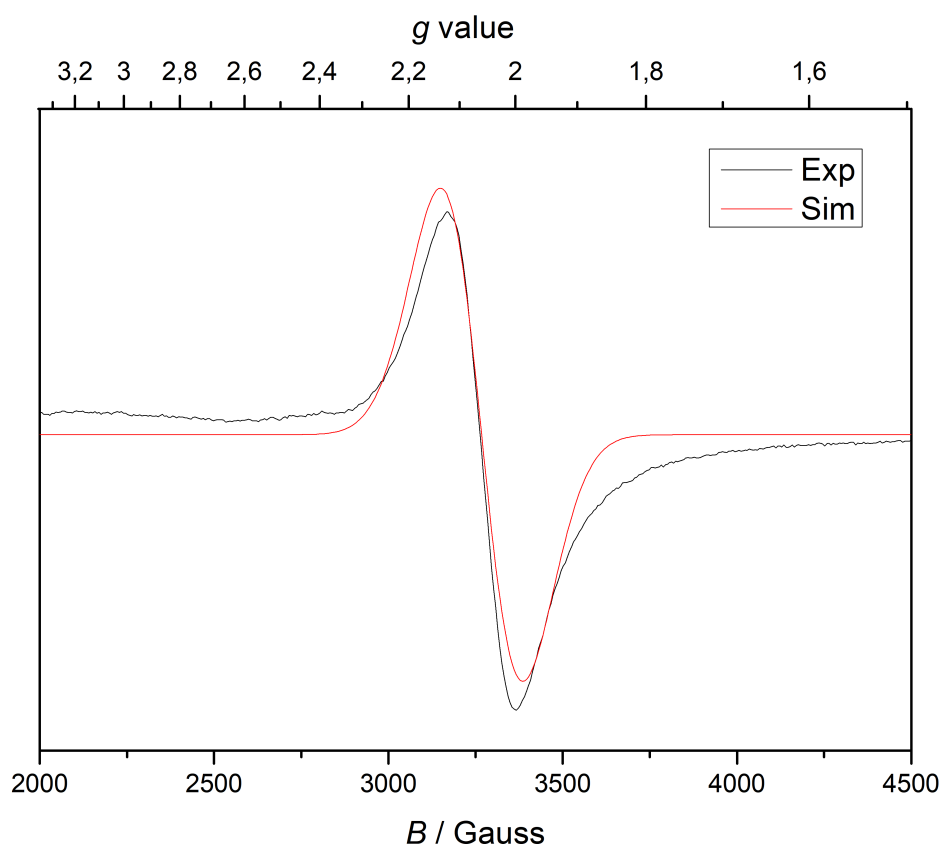

**Figure S11.** EPR spectrum of **5** (black), toluene, 293 K, 9.4262 GHz, simulation (red),  $g_{iso} = 2.0611$ .

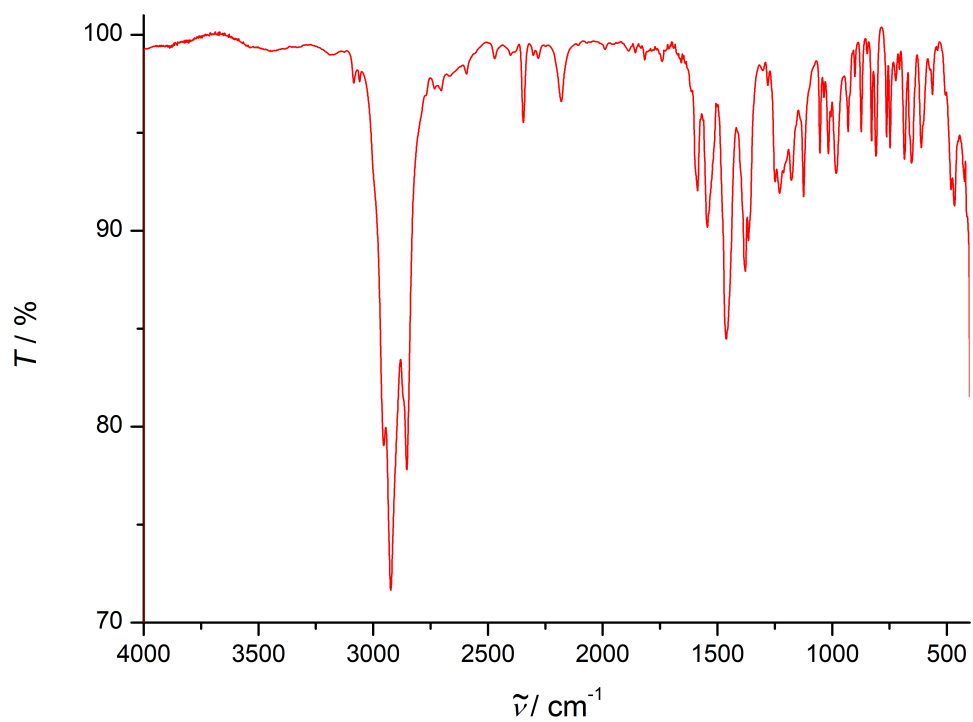

**Figure S12.** IR spectrum of **5**, Nujol, RT.

Spectroscopic characterization of **6**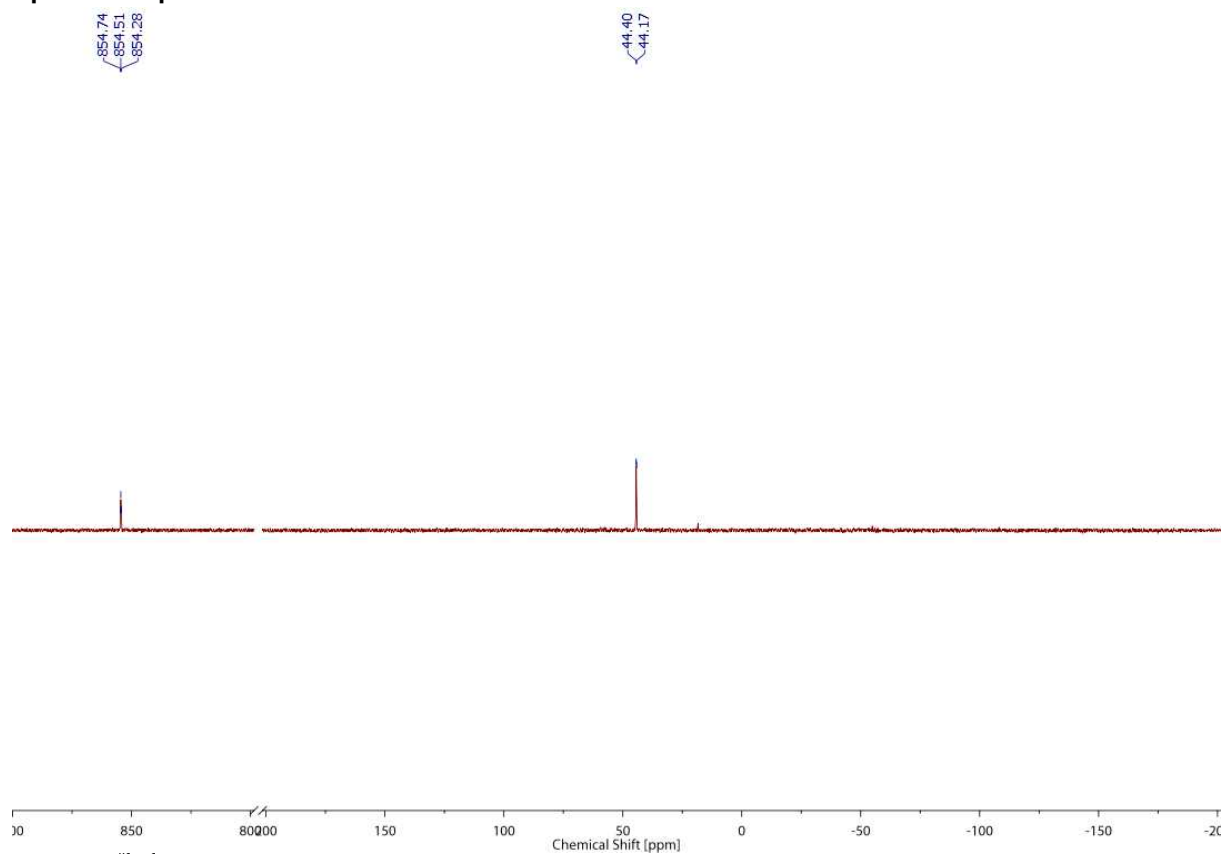**Figure S13.**  $^{31}\text{P}\{^1\text{H}\}$  NMR spectrum of **6**, THF- $d_8$ ,  $-30^\circ\text{C}$ .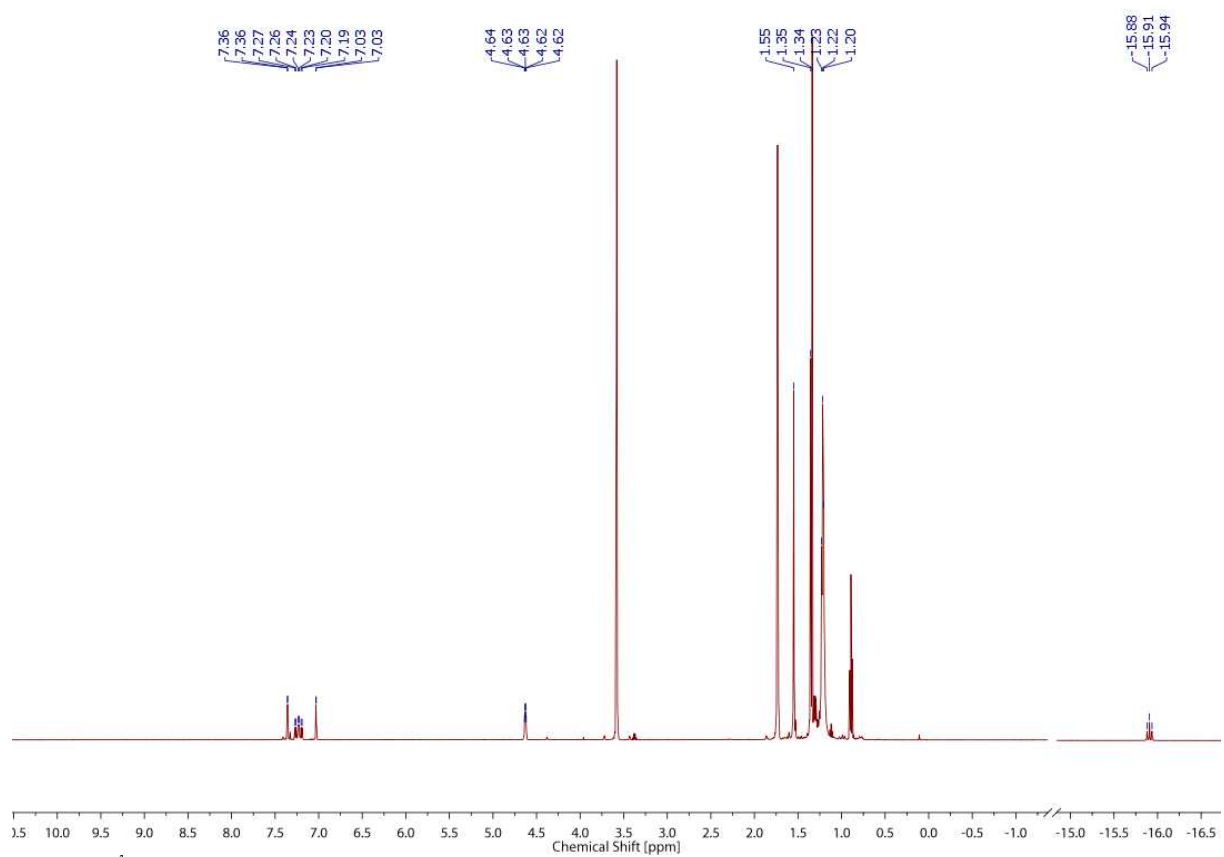**Figure S14.**  $^1\text{H}$  NMR spectrum of **6**, THF- $d_8$ ,  $-30^\circ\text{C}$ .

## Spectroscopic characterization of 7

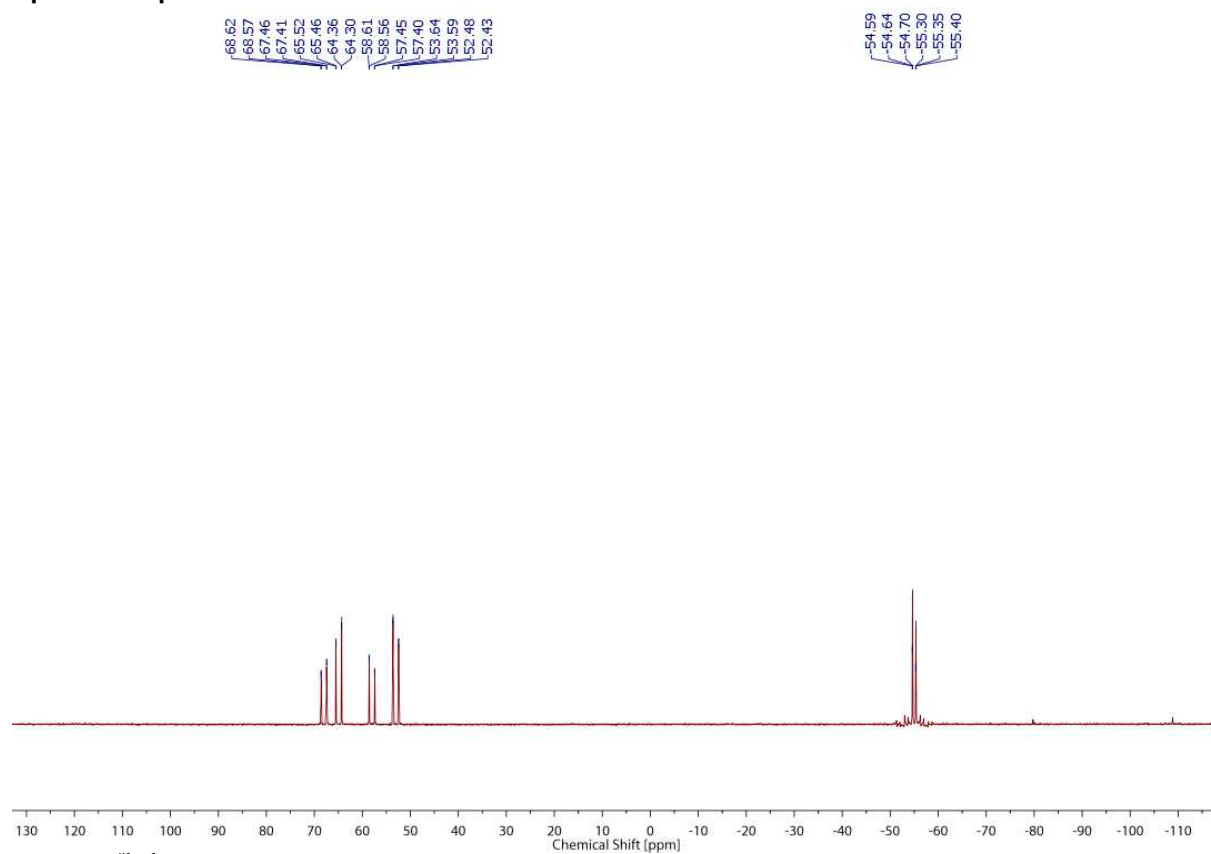Figure S15.  $^{31}\text{P}\{^1\text{H}\}$  NMR spectrum of 7,  $\text{C}_6\text{D}_6$ , RT.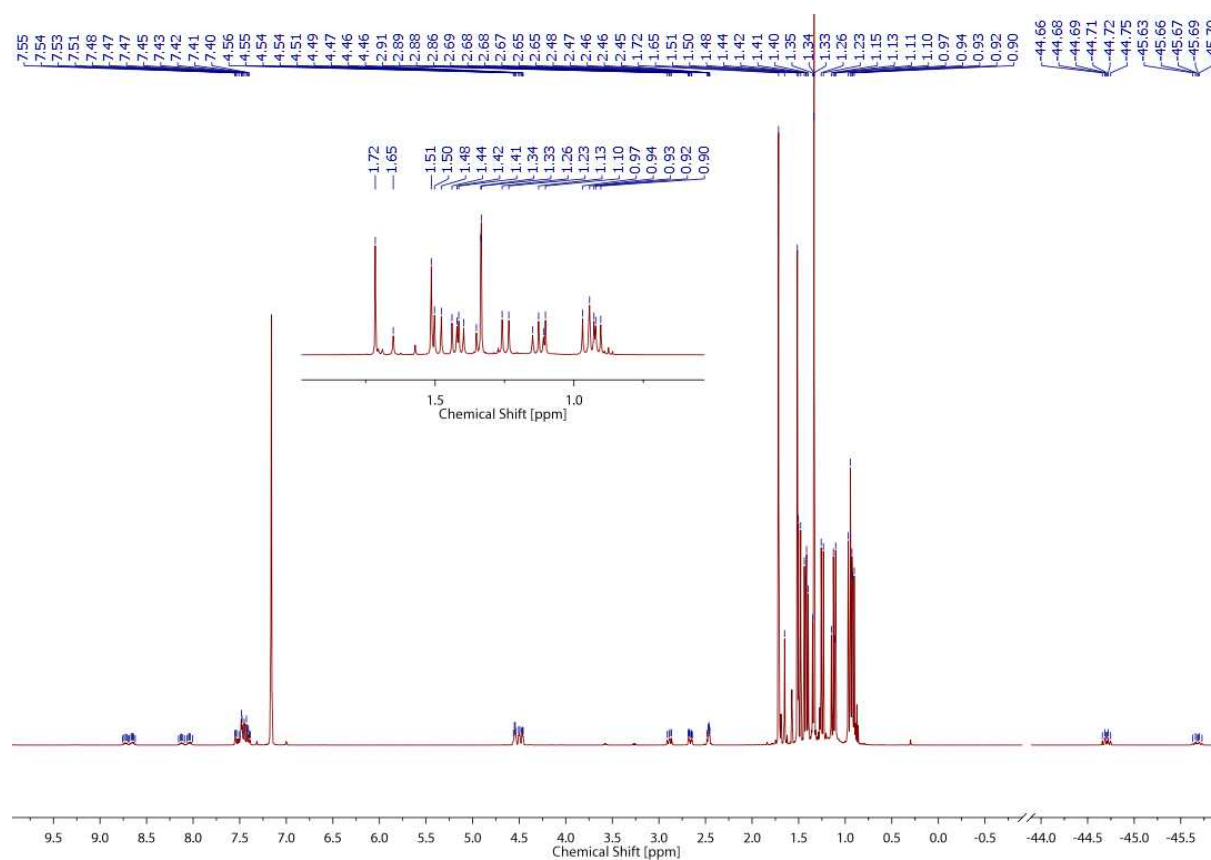Figure S16.  $^1\text{H}$  NMR spectrum of 7,  $\text{C}_6\text{D}_6$ , RT.

Spectroscopic characterization of **8**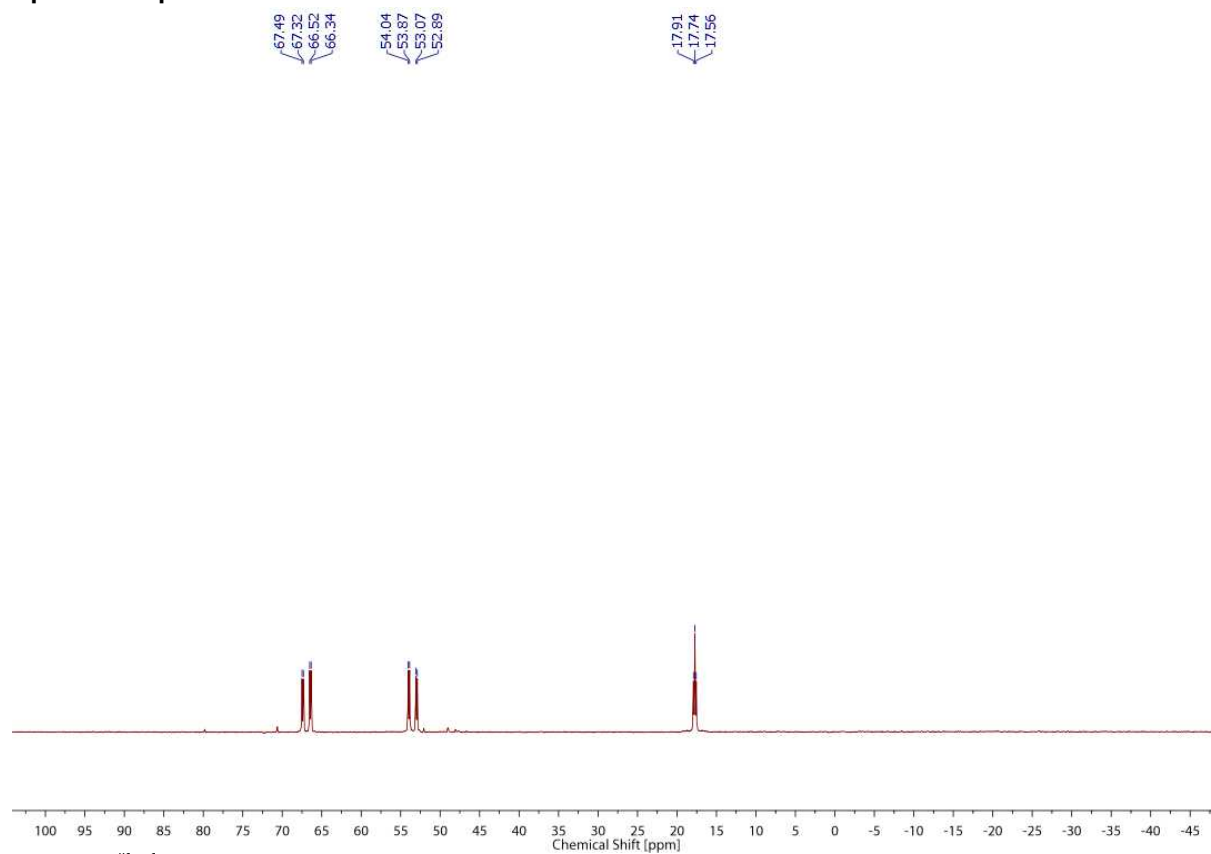Figure S17.  $^{31}\text{P}\{^1\text{H}\}$  NMR spectrum of **8**, THF- $d_8$ , RT.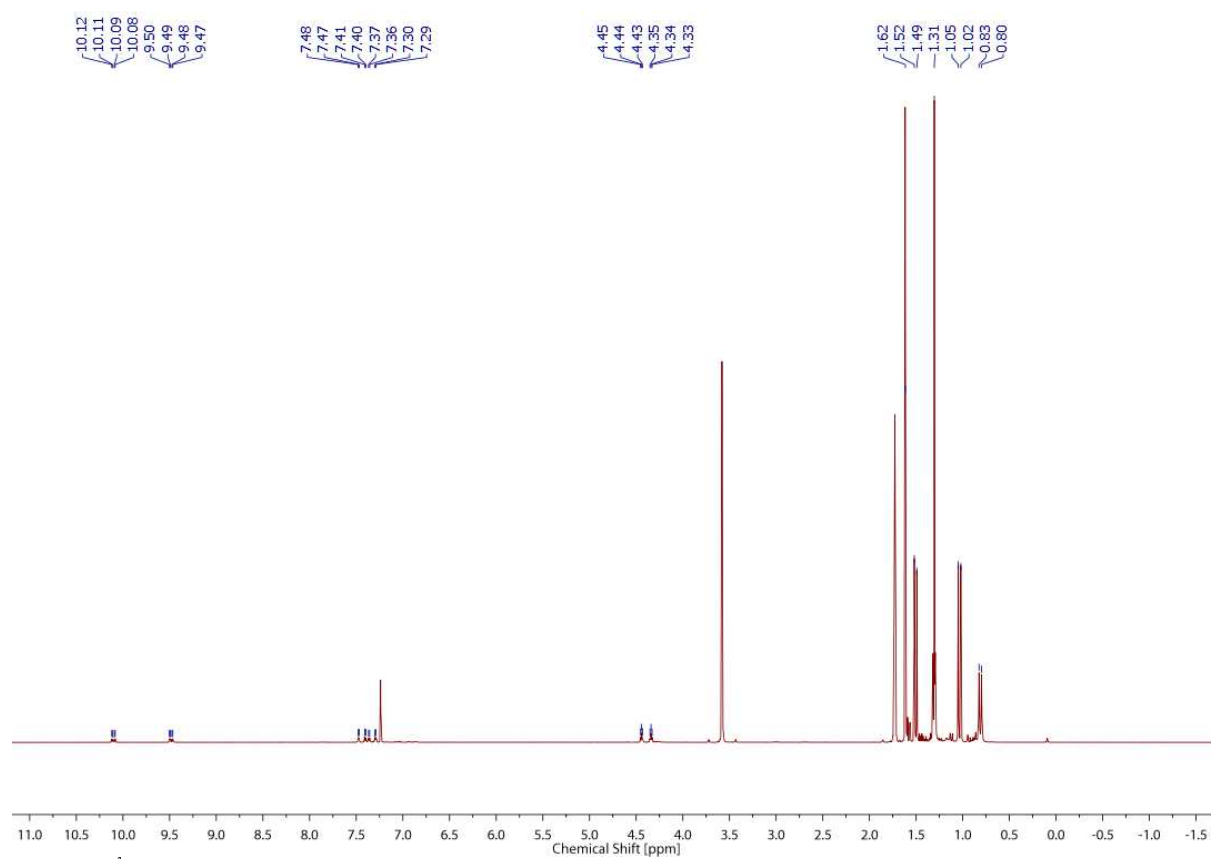Figure S18.  $^1\text{H}$  NMR spectrum of **8**, THF- $d_8$ , RT.

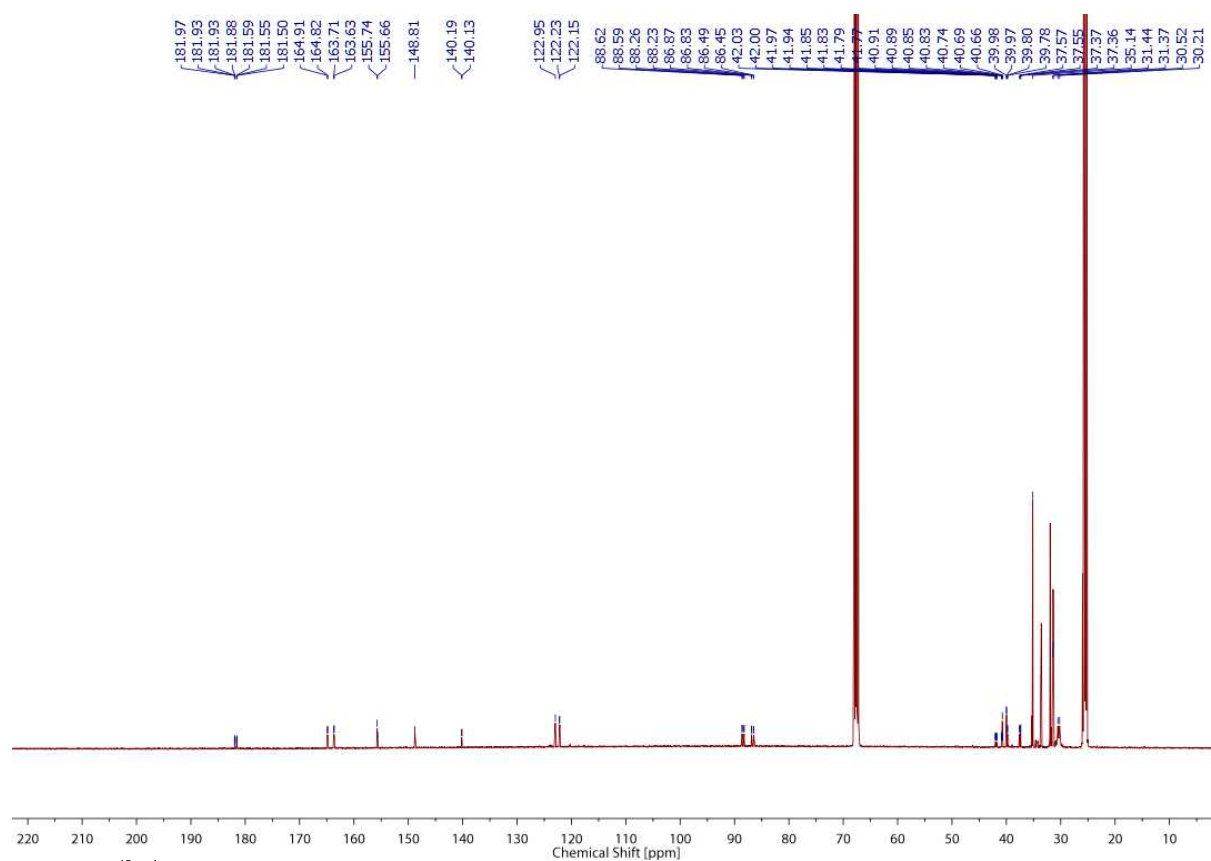

Figure S19.  $^{13}\text{C}\{^1\text{H}\}$  NMR spectrum of **8**, THF- $d_8$ , RT.

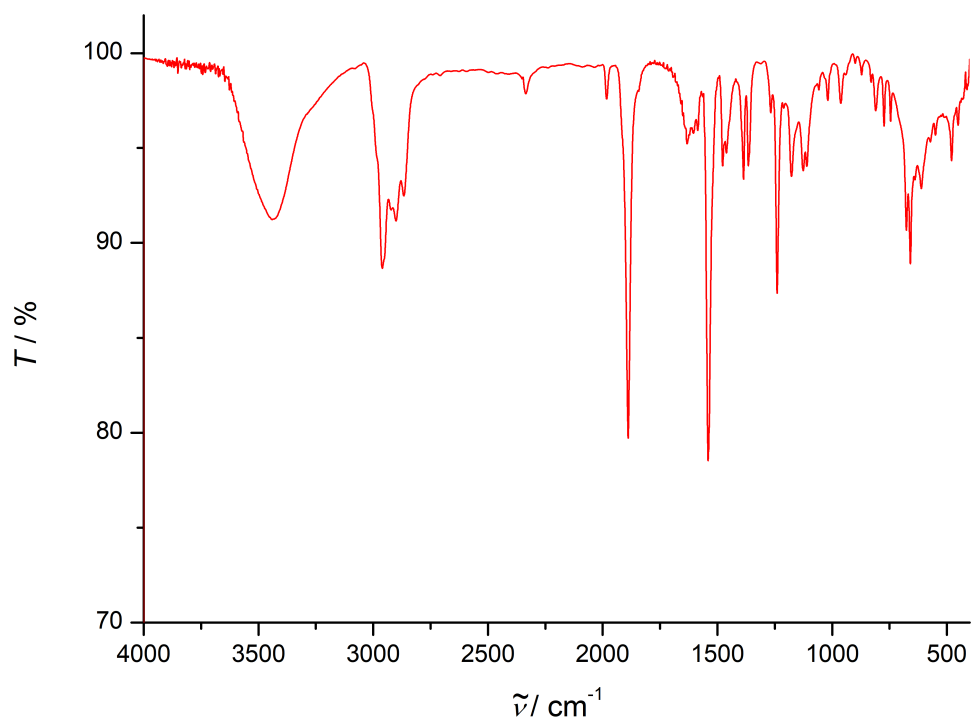

Figure S20. IR spectrum of **8**, KBr, RT.



Spectroscopic characterization of **9**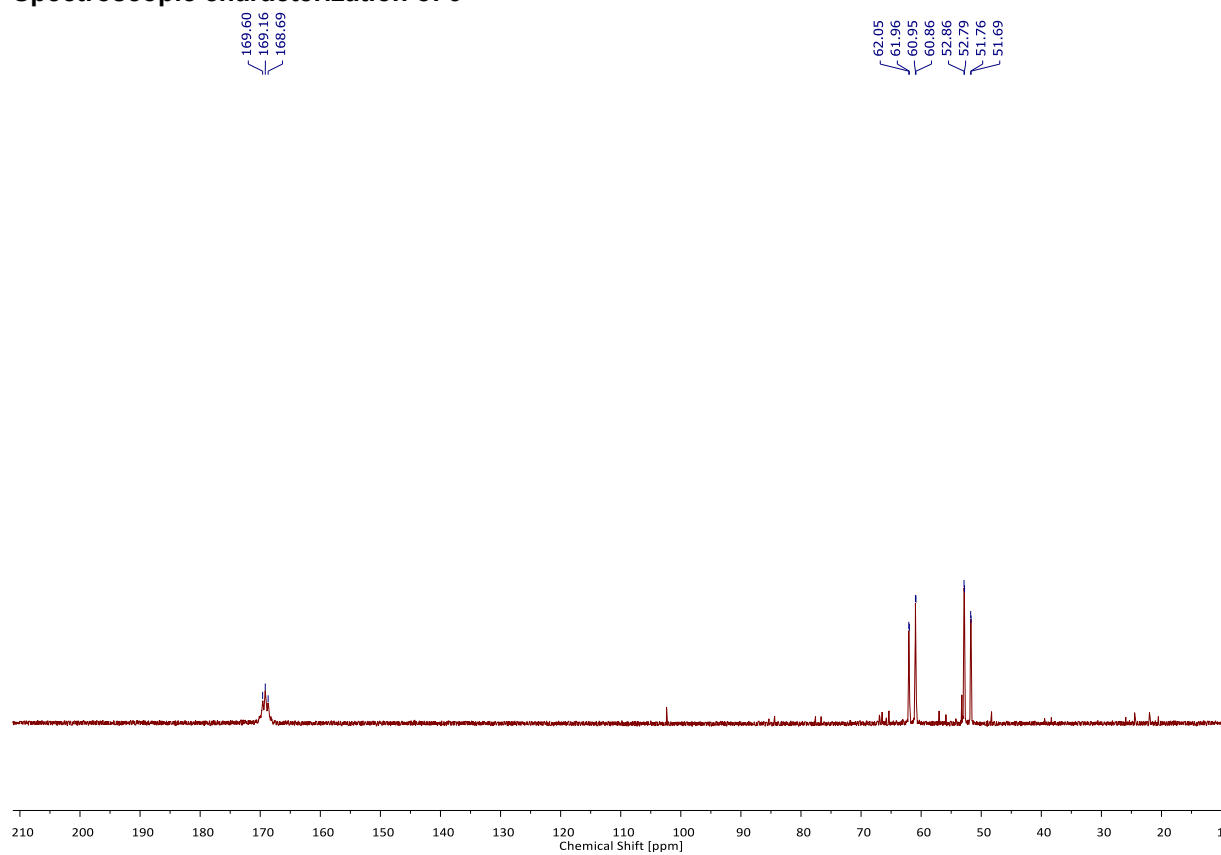Figure S21.  $^{31}\text{P}\{^1\text{H}\}$  NMR spectrum of **9**, THF- $d_8$ ,  $-30^\circ\text{C}$ .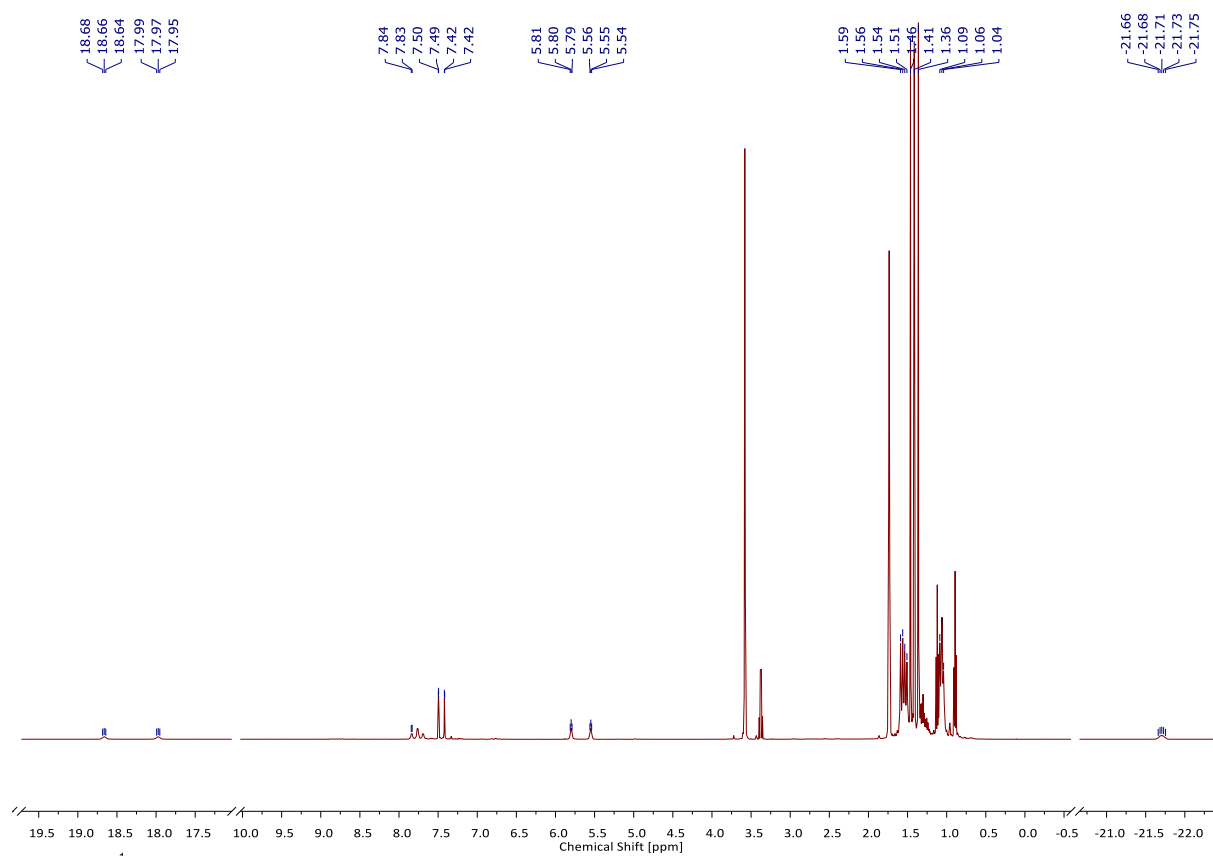Figure S22.  $^1\text{H}$  NMR spectrum of **9**, THF- $d_8$ ,  $-30^\circ\text{C}$ .

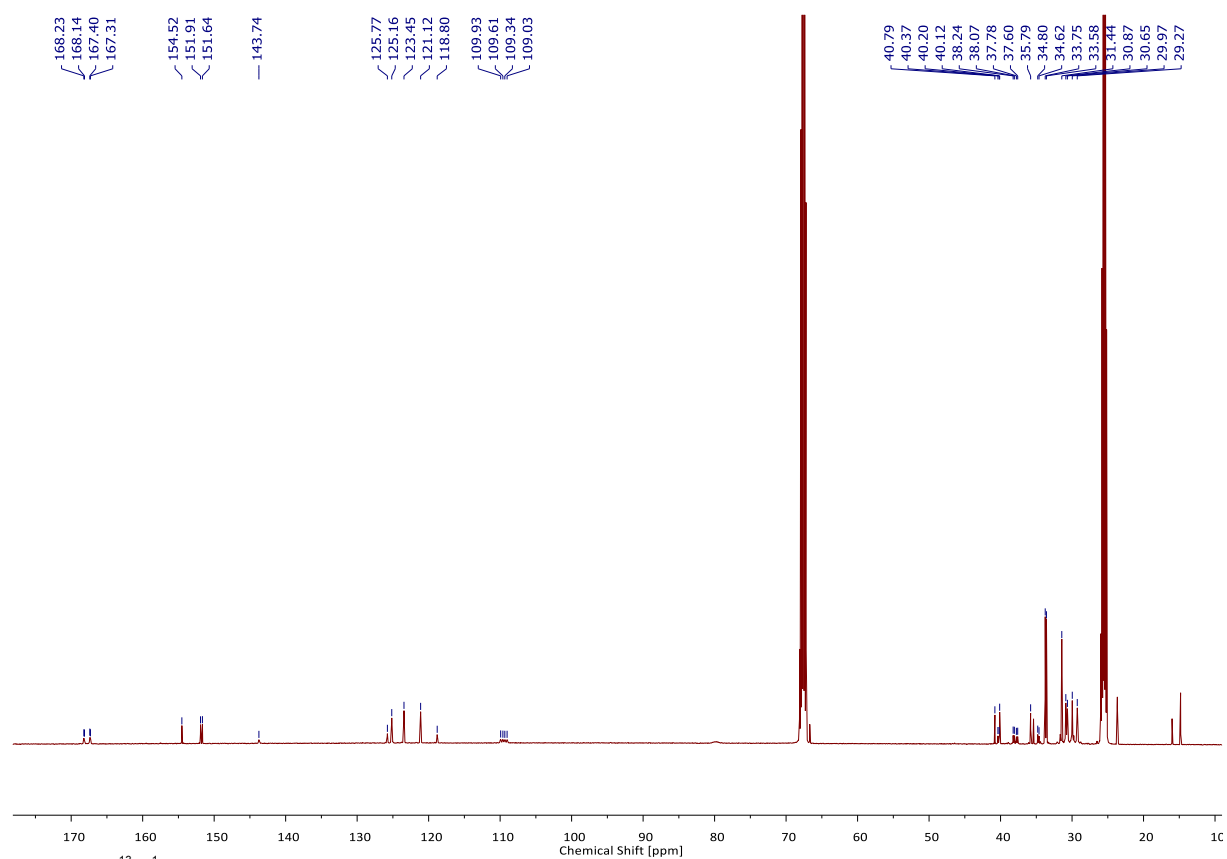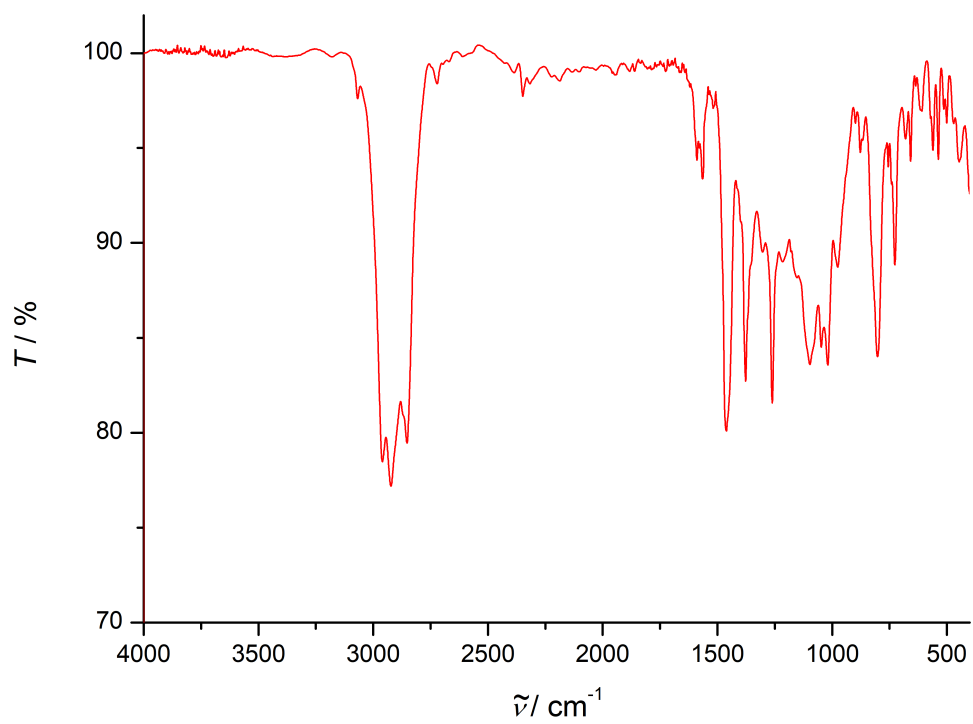

## Titration Calorimetry

### ITC in benzene

The Bond Dissociation Energy (BDE) of **5** was determined by Isothermal Titration Calorimetry using a TA INSTRUMENTS NanoITC equipped with a 24K gold cell (1 mL sample volume) and a 250  $\mu\text{L}$  titration syringe operated in overfill mode. The instrument was run under an inert atmosphere inside an argon filled glove box. The syringe concentration was chosen to be 6.4 times higher than the cell concentration to have a titration range from 0 to 2 eq. 2,4,6-Tris-*tert*-butylphenoxyradical ( $\text{Mes}^*\text{O}$ ;  $\text{BDE}(\text{O}-\text{H}) = 81.6 \text{ kcal/mol}$ )<sup>[4]</sup> was used as titrant. Both reactant solutions were prepared with Na/K dried benzene with a sample mass of more than 10.0 mg for sufficient accuracy. Titrations were carried out at 10 °C to suppress decay of **6** to **7** and corrected vs. addition of  $\text{Mes}^*\text{O}$  to pure benzene in the sample cell (18  $\mu\text{J}$  p. addition). Further experimental conditions are detailed in Table S1. The data was evaluated using the implemented NanoAnalyze software.<sup>[5]</sup>

**Table S2.** Experimental details of Isothermal Titration Calorimetry in benzene.

|                                            |                           |
|--------------------------------------------|---------------------------|
| Concentration and volume of <b>5</b>       | 1.02 mM/950 $\mu\text{L}$ |
| Concentration and volume of TBP            | 9.18 mM/250 $\mu\text{L}$ |
| Injection Steps/Injected Volume            | 33@7.5 $\mu\text{L}$      |
| Waiting time between two additions         | 350-650 s                 |
| Stirring rate                              | 350 rpm                   |
| Equilibration Time before experiment start | 1514 s                    |

\* The peaks for the BDE determination had a waiting time of 350 s.

A representative thermogram is shown in Figure S25. The first two peaks of each titration were generally neglected due to diffusion of reactant solution into the cell during equilibration of the instrument. Around the addition of one equivalent of  $\text{Mes}^*\text{O}$ , the peaks show increased tailing, which is tentatively attributed to follow-up reactivity of **6**. The P–H BDE was therefore determined at an early titration stage from the average of injections 3–6 (Tables 2 and 3) while reliable BDFE determination was not possible. A cumulative error of 5 % for stock solution concentrations was estimated from the fitted n-value (0.95) which gives rise to an error in  $\Delta H$  of 0.8 kcal/mol.

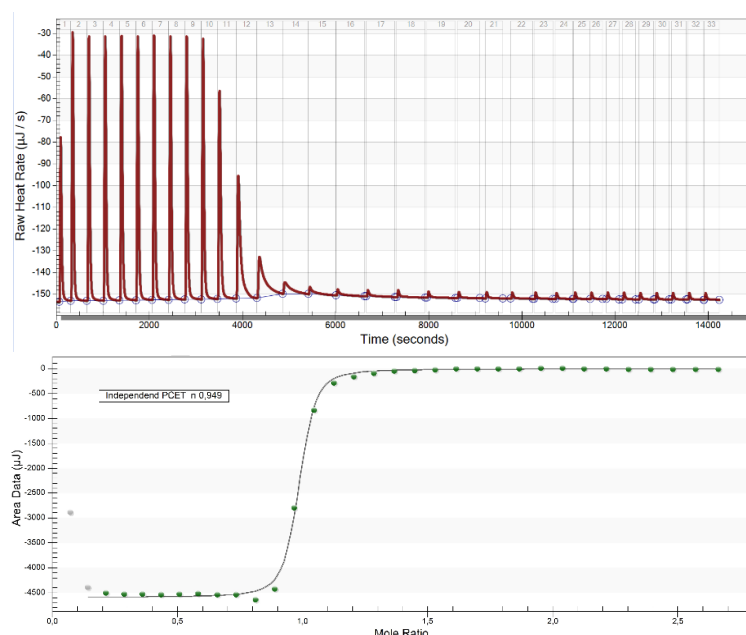

**Figure S25.** Representative thermogram (top) and integrated titration curve (bottom) of calorimetric titration of **5** with  $\text{Mes}^*\text{O}$  in benzene.

**Table S3.** Integrated heats of the injections 3-6 for the BDE determination of **5** in benzene.

| Injection | Heats [ $\mu\text{J}$ ] 1 <sup>st</sup> run | Heats [ $\mu\text{J}$ ] 2 <sup>nd</sup> run | Added moles |
|-----------|---------------------------------------------|---------------------------------------------|-------------|
| 3         | 4682                                        | 4678                                        | 6.82E-8     |
| 4         | 4708                                        | 4678                                        | 6.82E-8     |
| 5         | 4703                                        | 4709                                        | 6.82E-8     |
| 6         | 4716                                        | 4711                                        | 6.82E-8     |
| Mean      | 4702.25                                     | 4694                                        |             |

**Table S4.** Results of the calorimetric BDE determination in benzene.

|                            | $\Delta H$ (kJ/mol) | $\Delta H$ (kcal/mol) |
|----------------------------|---------------------|-----------------------|
| Mean 1 <sup>st</sup> run   | -68.9               | -16.5                 |
| Mean 2 <sup>nd</sup> run   | -68.8               | -16.4                 |
| Mean                       | -68.9               | -16.5                 |
| Mes*O <sup>[5]</sup>       |                     | 81.6                  |
| BDE [Os]-P <sup>H</sup> Ar |                     | 65.1±0.8              |

**ITC in THF**

The BDE measurement was also performed in THF to calculate a  $pK_A$  value of **5** via the Bordwell equation:

$$\text{BDE} = 23.06E^0 + 1.37pK_A + C_H. \text{ Where } C_H(\text{THF}) = 66 \text{ kcal/mol.}^{[6]}$$

Otherwise, the experimental procedure was carried out as described above using the parameters listed in Table S5.

**Table S5.** Experimental details of Isothermal Titration Calorimetry in THF.

|                                            |                           |
|--------------------------------------------|---------------------------|
| Concentration and volume of <b>5</b>       | 1.4 mM/950 $\mu\text{L}$  |
| Concentration and volume of TBP            | 11.7 mM/250 $\mu\text{L}$ |
| Injection Steps/Injected Volume            | 49@5 $\mu\text{L}$        |
| Waiting time between two additions         | 300 s                     |
| Stirring rate                              | 350 rpm                   |
| Equilibration Time before experiment start | 1671 s                    |

The P-H BDE of **5** was calculated from the mean heat evolved at the peaks 2-5 (Figure S26). The O-H BDE of Mes\*OH in THF was determined by a square scheme using the oxidation potential of the Mes\*-O/Mes\*-O<sup>-</sup> redox couple ( $E^0 = -0.955 \text{ V vs. Fc/Fc}^+$ ; Figure S27). The  $pK_A$  value of Mes\*OH was calculated from the reported value in DMSO according to Ding *et al.* ( $pK_A^{\text{THF}}(\text{Mes}^*\text{OH}) = 1.03 \cdot 17.8 + 11.3 = 29.6$ ).<sup>[7,8]</sup> This results in a BDE of 84.5 kcal/mol for Mes\*O/Mes\*OH.

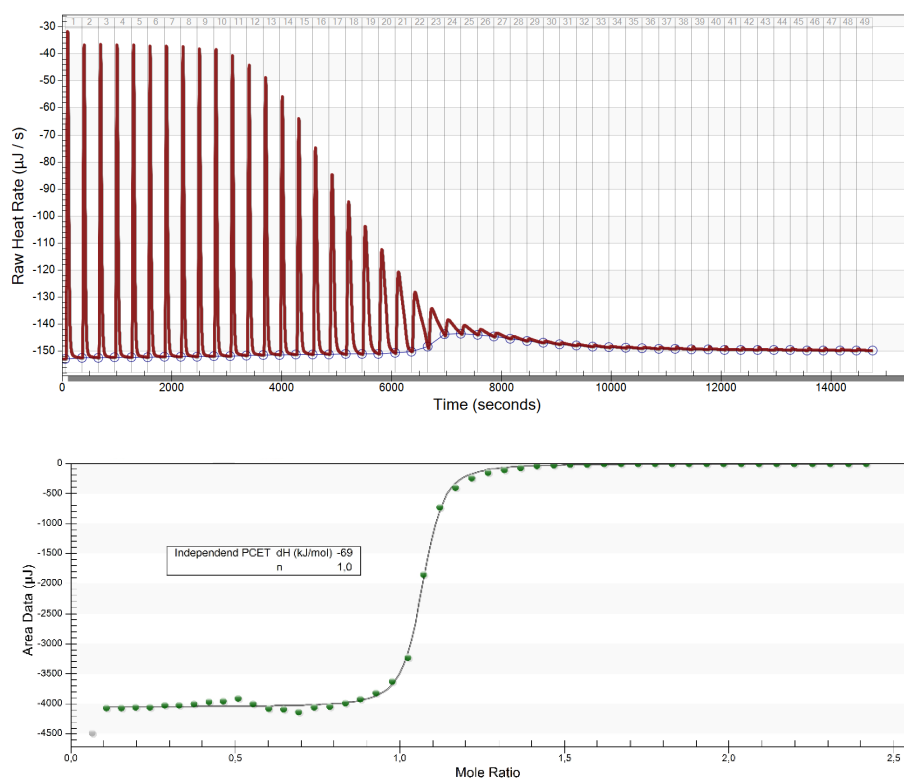**Figure S26.** Representative thermogram (top) and integrated titration curve (bottom) of calorimetric titration of **5** with Mes\*O in THF.

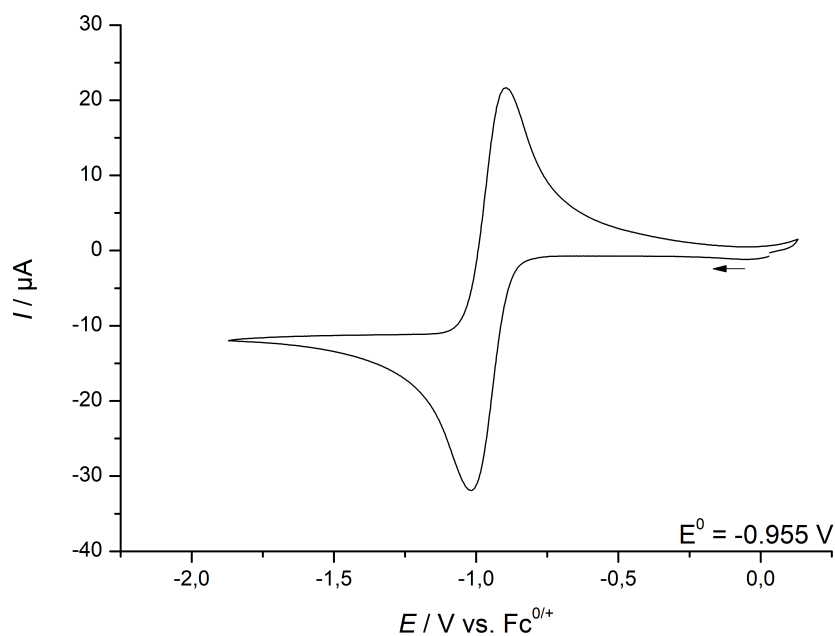

**Figure S27.** Cyclic voltammogram of Mes\*O, 100 mV/s, 1 mM, 0.1 M NBu<sub>4</sub>PF<sub>6</sub>, THF, RT.

**Table S6.** Integrated heats of the injections 2-5 for the BDE determination of **5** in THF.

| Injection* | Heats [μJ] | Added moles |
|------------|------------|-------------|
| 2          | 4069       | 5.69E-8     |
| 3          | 4066       | 5.69E-8     |
| 4          | 4050       | 5.69E-8     |
| 5          | 4049       | 5.69E-8     |
| Mean       | 4059       |             |

**Table S7.** BDE determination in THF.

|                            | ΔH (kJ/mol) | ΔH (kcal/mol) |
|----------------------------|-------------|---------------|
| Mean heat peaks 2-5        | -71         | -17           |
| Mes*O(THF)                 |             | 84.5          |
| BDE [Os]-P <sup>H</sup> Ar |             | 67±1          |

The pK<sub>A</sub> value of **9** was calculated using E<sup>0</sup>(**5**) = -0.88 V and BDE<sub>P-H</sub>(**5**) = 67 kcal mol<sup>-1</sup>:

$$\text{p}K_a = \frac{\text{BDE} - 23.06E^0 - C_H}{1.37} = 16$$

### Crystallographic Details

CCDC-1894136 (**4**), CCDC-1894134 (**5**), CCDC-1894133 (**8**) and CCDC-1894135 (**9**) contain the supplementary crystallographic data for this paper. This data can be obtained free of charge via <http://www.ccdc.cam.ac.uk/products/csd/request/> (or from Cambridge Crystallographic Data Centre, 12 Union Road, Cambridge, CB2 1EZ, UK. Fax: +44-1223- 336-033; e-mail: [deposit@ccdc.cam.ac.uk](mailto:deposit@ccdc.cam.ac.uk)).

Suitable single crystals for X-ray structure determination were selected from the mother liquor under an inert gas atmosphere and transferred in protective perfluoro polyether oil on a microscope slide. The selected and mounted crystals were transferred to the cold gas stream on the diffractometer. The diffraction data were obtained at 100 K on a Bruker D8 three-circle diffractometer, equipped with a PHOTON 100 CMOS detector and an INCOATEC microfocus source with Quazar mirror optics (Mo-K $\alpha$  radiation,  $\lambda = 0.71073 \text{ \AA}$ ).

The data obtained were integrated with SAINT and a semi-empirical absorption correction from equivalents with SADABS was applied. The structures were solved and refined using the Bruker SHELX 2014 software package.<sup>[9]</sup> All non-hydrogen atoms were refined with anisotropic displacement parameters. All C-H hydrogen atoms were refined isotropically on calculated positions by using a riding model with their  $U_{\text{iso}}$  values constrained to 1.5  $U_{\text{eq}}$  of their pivot atoms for terminal sp<sup>3</sup> carbon atoms and 1.2 times for all other atoms.

## X-ray Single-Crystal Structure Analysis of 4

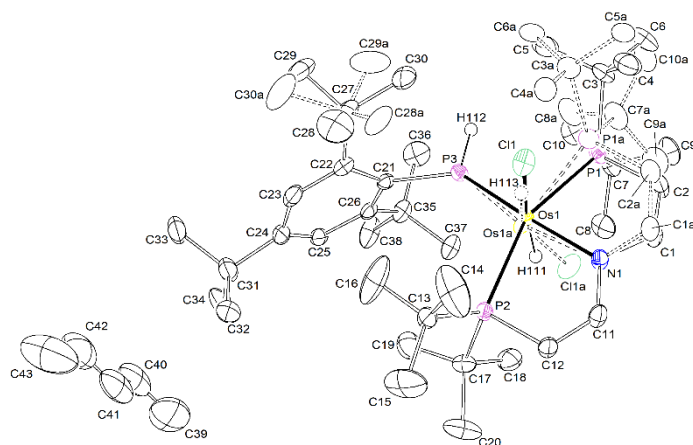

**Figure S28.** Thermal ellipsoid plot of **4** with the anisotropic displacement parameters drawn at the 50% probability level. The asymmetric unit contains one disordered complex molecule and one disordered pentane solvent molecule. The disordered Os(PNP)-part of the complex molecule was refined with population of 0.915(2) on the main domain using some restraints and constraints (SADI, RIGU, EADP). The disordered  $-\text{C}(\text{CH}_3)_3$ -part of the complex molecule was refined with population of 0.737(7) on the main domain using some restraints (SADI, RIGU,). The disordered solvent molecule was refined using PART-1 command and some restraints (SADI, RIGU) and constraints (EADP). The Os-H and P-H hydrogen atoms were found from the residual density map and isotropically refined.

**Table S8.** Crystal data and structure refinement for **4**.

|                                 |                                                                                          |                           |
|---------------------------------|------------------------------------------------------------------------------------------|---------------------------|
| Identification code             | mo_CW_JA_060917_3_0m_a (JA-MN-45)                                                        |                           |
| Empirical formula               | $\text{C}_{39} \text{H}_{71} \text{ClNOsP}_3 \times \frac{1}{2} \text{C}_5\text{H}_{12}$ |                           |
| Formula weight                  | 896.59                                                                                   |                           |
| Temperature                     | 100(2) K                                                                                 |                           |
| Wavelength                      | 0.71073 Å                                                                                |                           |
| Crystal system                  | Monoclinic                                                                               |                           |
| Space group                     | C2/c                                                                                     |                           |
| Unit cell dimensions            | $a = 28.7206(11) \text{ Å}$                                                              | $\alpha = 90^\circ$       |
|                                 | $b = 12.8908(5) \text{ Å}$                                                               | $\beta = 99.050(2)^\circ$ |
|                                 | $c = 23.8342(9) \text{ Å}$                                                               | $\gamma = 90^\circ$       |
| Volume                          | $8714.3(6) \text{ Å}^3$                                                                  |                           |
| Z                               | 8                                                                                        |                           |
| Density (calculated)            | $1.367 \text{ Mg/m}^3$                                                                   |                           |
| Absorption coefficient          | $3.125 \text{ mm}^{-1}$                                                                  |                           |
| F(000)                          | 3720                                                                                     |                           |
| Crystal size                    | $0.163 \times 0.105 \times 0.054 \text{ mm}^3$                                           |                           |
| Crystal shape and color         | Plate,                                                                                   | clear intense blue-green  |
| Theta range for data collection | 2.370 to 28.352°                                                                         |                           |
| Index ranges                    | -38 ≤ h ≤ 38, -17 ≤ k ≤ 17, -31 ≤ l ≤ 31                                                 |                           |
| Reflections collected           | 152470                                                                                   |                           |
| Independent reflections         | 10862 [R(int) = 0.0597]                                                                  |                           |
| Completeness to theta = 25.242° | 99.9 %                                                                                   |                           |
| Refinement method               | Full-matrix least-squares on $F^2$                                                       |                           |
| Data / restraints / parameters  | 10862 / 619 / 612                                                                        |                           |

---

|                                      |                                   |              |
|--------------------------------------|-----------------------------------|--------------|
| Goodness-of-fit on $F^2$             | 1.201                             |              |
| Final R indices [ $I > 2\sigma(I)$ ] | R1 = 0.0332,                      | wR2 = 0.0546 |
| R indices (all data)                 | R1 = 0.0420,                      | wR2 = 0.0564 |
| Largest diff. peak and hole          | 1.000 and -1.522 eÅ <sup>-3</sup> |              |



**Table S9.** Bond lengths [Å] and angles [°] for **4**.

|               |            |                    |            |
|---------------|------------|--------------------|------------|
| P(3)-C(21)    | 1.838(3)   | Os(1A)-H(113)      | 1.54(2)    |
| P(3)-Os(1A)   | 2.109(9)   | C(1A)-C(2A)        | 1.33(2)    |
| P(3)-Os(1)    | 2.1919(11) | C(2A)-P(1A)        | 1.80(4)    |
| P(3)-H(112)   | 1.35(3)    | C(3A)-C(6A)        | 1.41(5)    |
| N(1)-C(1A)    | 1.357(19)  | C(3A)-C(4A)        | 1.43(5)    |
| N(1)-C(11)    | 1.369(4)   | C(3A)-C(5A)        | 1.48(5)    |
| N(1)-C(1)     | 1.376(4)   | C(3A)-P(1A)        | 1.99(4)    |
| N(1)-Os(1)    | 2.078(3)   | C(7A)-C(9A)        | 1.535(16)  |
| N(1)-Os(1A)   | 2.182(9)   | C(7A)-C(8A)        | 1.538(16)  |
| P(2)-C(12)    | 1.785(3)   | C(7A)-C(10A)       | 1.542(16)  |
| P(2)-C(13)    | 1.891(3)   | C(7A)-P(1A)        | 1.88(4)    |
| P(2)-C(17)    | 1.900(4)   | C(21)-P(3)-Os(1A)  | 134.9(2)   |
| P(2)-Os(1A)   | 2.336(9)   | C(21)-P(3)-Os(1)   | 138.78(10) |
| P(2)-Os(1)    | 2.4475(10) | C(21)-P(3)-H(112)  | 99.9(14)   |
| C(11)-C(12)   | 1.332(4)   | Os(1A)-P(3)-H(112) | 123.0(14)  |
| C(13)-C(16)   | 1.505(5)   | Os(1)-P(3)-H(112)  | 121.0(14)  |
| C(13)-C(14)   | 1.507(6)   | C(1A)-N(1)-C(11)   | 115.1(17)  |
| C(13)-C(15)   | 1.515(5)   | C(11)-N(1)-C(1)    | 117.0(3)   |
| C(17)-C(19)   | 1.529(5)   | C(11)-N(1)-Os(1)   | 122.1(2)   |
| C(17)-C(18)   | 1.537(5)   | C(1)-N(1)-Os(1)    | 120.8(2)   |
| C(17)-C(20)   | 1.538(5)   | C(1A)-N(1)-Os(1A)  | 125.8(17)  |
| C(21)-C(22)   | 1.423(4)   | C(11)-N(1)-Os(1A)  | 118.4(3)   |
| C(21)-C(26)   | 1.428(4)   | C(12)-P(2)-C(13)   | 103.31(15) |
| C(22)-C(23)   | 1.385(5)   | C(12)-P(2)-C(17)   | 102.49(16) |
| C(22)-C(27)   | 1.556(4)   | C(13)-P(2)-C(17)   | 108.42(15) |
| C(23)-C(24)   | 1.385(5)   | C(12)-P(2)-Os(1A)  | 102.3(2)   |
| C(24)-C(25)   | 1.394(5)   | C(13)-P(2)-Os(1A)  | 126.7(2)   |
| C(24)-C(31)   | 1.527(5)   | C(17)-P(2)-Os(1A)  | 110.45(19) |
| C(25)-C(26)   | 1.392(4)   | C(12)-P(2)-Os(1)   | 99.36(11)  |
| C(26)-C(35)   | 1.553(4)   | C(13)-P(2)-Os(1)   | 122.09(11) |
| C(27)-C(28A)  | 1.378(15)  | C(17)-P(2)-Os(1)   | 117.49(11) |
| C(27)-C(29)   | 1.503(6)   | C(12)-C(11)-N(1)   | 122.6(3)   |
| C(27)-C(30)   | 1.542(6)   | C(11)-C(12)-P(2)   | 116.5(2)   |
| C(27)-C(28)   | 1.557(7)   | C(16)-C(13)-C(14)  | 109.1(4)   |
| C(27)-C(29A)  | 1.584(19)  | C(16)-C(13)-C(15)  | 108.1(4)   |
| C(27)-C(30A)  | 1.602(17)  | C(14)-C(13)-C(15)  | 107.0(4)   |
| C(31)-C(34)   | 1.531(6)   | C(16)-C(13)-P(2)   | 108.7(3)   |
| C(31)-C(32)   | 1.533(5)   | C(14)-C(13)-P(2)   | 108.4(3)   |
| C(31)-C(33)   | 1.542(5)   | C(15)-C(13)-P(2)   | 115.4(3)   |
| C(35)-C(36)   | 1.528(5)   | C(19)-C(17)-C(18)  | 109.0(3)   |
| C(35)-C(37)   | 1.528(4)   | C(19)-C(17)-C(20)  | 110.5(3)   |
| C(35)-C(38)   | 1.543(5)   | C(18)-C(17)-C(20)  | 104.8(3)   |
| C(40)-C(39)   | 1.332(13)  | C(19)-C(17)-P(2)   | 110.8(2)   |
| C(40)-C(41)   | 1.368(12)  | C(18)-C(17)-P(2)   | 107.5(2)   |
| C(42)-C(43)   | 1.329(13)  | C(20)-C(17)-P(2)   | 113.9(3)   |
| C(42)-C(41)   | 1.333(13)  | C(22)-C(21)-C(26)  | 118.2(3)   |
| P(1)-C(2)     | 1.789(3)   | C(22)-C(21)-P(3)   | 119.6(2)   |
| P(1)-C(3)     | 1.905(4)   | C(26)-C(21)-P(3)   | 121.5(2)   |
| P(1)-C(7)     | 1.913(4)   | C(23)-C(22)-C(21)  | 118.1(3)   |
| P(1)-Os(1)    | 2.4004(11) | C(23)-C(22)-C(27)  | 116.6(3)   |
| Os(1)-Cl(1)   | 2.4912(11) | C(21)-C(22)-C(27)  | 124.6(3)   |
| Os(1)-H(111)  | 1.54(2)    | C(24)-C(23)-C(22)  | 123.3(3)   |
| C(1)-C(2)     | 1.337(5)   | C(23)-C(24)-C(25)  | 116.6(3)   |
| C(3)-C(5)     | 1.511(6)   | C(23)-C(24)-C(31)  | 120.0(3)   |
| C(3)-C(4)     | 1.537(6)   | C(25)-C(24)-C(31)  | 123.4(3)   |
| C(3)-C(6)     | 1.547(5)   | C(26)-C(25)-C(24)  | 122.8(3)   |
| C(7)-C(8)     | 1.530(5)   | C(25)-C(26)-C(21)  | 117.9(3)   |
| C(7)-C(10)    | 1.533(5)   | C(25)-C(26)-C(35)  | 118.6(3)   |
| C(7)-C(9)     | 1.542(5)   | C(21)-C(26)-C(35)  | 123.4(3)   |
| Cl(1A)-Os(1A) | 2.412(12)  | C(29)-C(27)-C(30)  | 107.9(4)   |
| Os(1A)-P(1A)  | 2.507(14)  | C(28A)-C(27)-C(22) | 113.9(7)   |

|                     |            |                      |           |
|---------------------|------------|----------------------|-----------|
| C(29)-C(27)-C(22)   | 106.0(3)   | N(1)-Os(1A)-P(2)     | 79.8(3)   |
| C(30)-C(27)-C(22)   | 115.4(3)   | P(3)-Os(1A)-Cl(1A)   | 105.6(4)  |
| C(29)-C(27)-C(28)   | 109.1(5)   | N(1)-Os(1A)-Cl(1A)   | 79.3(4)   |
| C(30)-C(27)-C(28)   | 104.6(4)   | P(2)-Os(1A)-Cl(1A)   | 99.9(4)   |
| C(22)-C(27)-C(28)   | 113.6(3)   | P(3)-Os(1A)-P(1A)    | 90.0(4)   |
| C(28A)-C(27)-C(29A) | 115.0(11)  | N(1)-Os(1A)-P(1A)    | 76.4(3)   |
| C(22)-C(27)-C(29A)  | 103.9(6)   | P(2)-Os(1A)-P(1A)    | 151.6(4)  |
| C(28A)-C(27)-C(30A) | 111.8(10)  | Cl(1A)-Os(1A)-P(1A)  | 90.7(5)   |
| C(22)-C(27)-C(30A)  | 107.2(7)   | P(3)-Os(1A)-H(113)   | 95(3)     |
| C(29A)-C(27)-C(30A) | 104.2(12)  | N(1)-Os(1A)-H(113)   | 77(3)     |
| C(24)-C(31)-C(34)   | 112.0(3)   | P(2)-Os(1A)-H(113)   | 90(2)     |
| C(24)-C(31)-C(32)   | 108.5(3)   | Cl(1A)-Os(1A)-H(113) | 152(3)    |
| C(34)-C(31)-C(32)   | 108.1(3)   | P(1A)-Os(1A)-H(113)  | 70(2)     |
| C(24)-C(31)-C(33)   | 110.3(3)   | C(2A)-C(1A)-N(1)     | 118(3)    |
| C(34)-C(31)-C(33)   | 109.7(4)   | C(2A)-C(1A)-H(1A)    | 121.2     |
| C(32)-C(31)-C(33)   | 108.2(3)   | N(1)-C(1A)-H(1A)     | 121.2     |
| C(36)-C(35)-C(37)   | 110.4(3)   | C(1A)-C(2A)-P(1A)    | 121(3)    |
| C(36)-C(35)-C(38)   | 105.1(3)   | C(1A)-C(2A)-H(2A)    | 119.4     |
| C(37)-C(35)-C(38)   | 106.7(3)   | P(1A)-C(2A)-H(2A)    | 119.4     |
| C(36)-C(35)-C(26)   | 110.0(3)   | C(6A)-C(3A)-C(4A)    | 114(4)    |
| C(37)-C(35)-C(26)   | 113.0(2)   | C(6A)-C(3A)-C(5A)    | 109(3)    |
| C(38)-C(35)-C(26)   | 111.3(3)   | C(4A)-C(3A)-C(5A)    | 109(3)    |
| C(39)-C(40)-C(41)   | 114.7(10)  | C(6A)-C(3A)-P(1A)    | 108(3)    |
| C(43)-C(42)-C(41)   | 123.3(16)  | C(4A)-C(3A)-P(1A)    | 107(3)    |
| C(42)-C(41)-C(40)   | 114.2(13)  | C(5A)-C(3A)-P(1A)    | 109(3)    |
| C(2)-P(1)-C(3)      | 104.38(17) | C(9A)-C(7A)-C(8A)    | 106(4)    |
| C(2)-P(1)-C(7)      | 101.81(17) | C(9A)-C(7A)-C(10A)   | 108(4)    |
| C(3)-P(1)-C(7)      | 108.42(16) | C(8A)-C(7A)-C(10A)   | 105(3)    |
| C(2)-P(1)-Os(1)     | 100.02(12) | C(9A)-C(7A)-P(1A)    | 109(3)    |
| C(3)-P(1)-Os(1)     | 122.24(13) | C(8A)-C(7A)-P(1A)    | 112(3)    |
| C(7)-P(1)-Os(1)     | 116.55(12) | C(10A)-C(7A)-P(1A)   | 116(3)    |
| N(1)-Os(1)-P(3)     | 171.59(8)  | C(2A)-P(1A)-C(7A)    | 104.7(17) |
| N(1)-Os(1)-P(1)     | 80.24(7)   | C(2A)-P(1A)-C(3A)    | 102.9(18) |
| P(3)-Os(1)-P(1)     | 93.81(4)   | C(7A)-P(1A)-C(3A)    | 110.9(16) |
| N(1)-Os(1)-P(2)     | 79.29(7)   | C(2A)-P(1A)-Os(1A)   | 98.9(12)  |
| P(3)-Os(1)-P(2)     | 105.12(4)  | C(7A)-P(1A)-Os(1A)   | 119.8(12) |
| P(1)-Os(1)-P(2)     | 156.14(5)  | C(3A)-P(1A)-Os(1A)   | 116.4(13) |
| N(1)-Os(1)-Cl(1)    | 85.23(8)   |                      |           |
| P(3)-Os(1)-Cl(1)    | 101.17(4)  |                      |           |
| P(1)-Os(1)-Cl(1)    | 93.62(5)   |                      |           |
| P(2)-Os(1)-Cl(1)    | 96.76(4)   |                      |           |
| N(1)-Os(1)-H(111)   | 85.1(11)   |                      |           |
| P(3)-Os(1)-H(111)   | 88.8(11)   |                      |           |
| P(1)-Os(1)-H(111)   | 87.8(8)    |                      |           |
| P(2)-Os(1)-H(111)   | 78.4(10)   |                      |           |
| Cl(1)-Os(1)-H(111)  | 169.8(12)  |                      |           |
| C(2)-C(1)-N(1)      | 122.8(3)   |                      |           |
| C(1)-C(2)-P(1)      | 115.8(3)   |                      |           |
| C(5)-C(3)-C(4)      | 109.5(4)   |                      |           |
| C(5)-C(3)-C(6)      | 109.3(4)   |                      |           |
| C(4)-C(3)-C(6)      | 104.9(3)   |                      |           |
| C(5)-C(3)-P(1)      | 109.4(3)   |                      |           |
| C(4)-C(3)-P(1)      | 107.5(3)   |                      |           |
| C(6)-C(3)-P(1)      | 115.9(3)   |                      |           |
| C(8)-C(7)-C(10)     | 107.8(3)   |                      |           |
| C(8)-C(7)-C(9)      | 105.5(3)   |                      |           |
| C(10)-C(7)-C(9)     | 109.8(3)   |                      |           |
| C(8)-C(7)-P(1)      | 108.4(2)   |                      |           |
| C(10)-C(7)-P(1)     | 112.3(3)   |                      |           |
| C(9)-C(7)-P(1)      | 112.6(3)   |                      |           |
| P(3)-Os(1A)-N(1)    | 165.7(4)   |                      |           |
| P(3)-Os(1A)-P(2)    | 112.0(4)   |                      |           |

---

Symmetry transformations used to generate equivalent atoms:

**Table S10.** Torsion angles [°] for **4**.

|                         |           |                           |            |
|-------------------------|-----------|---------------------------|------------|
| C(1A)-N(1)-C(11)-C(12)  | 165(2)    | C(23)-C(22)-C(27)-C(28A)  | 106.9(10)  |
| C(1)-N(1)-C(11)-C(12)   | -173.7(3) | C(21)-C(22)-C(27)-C(28A)  | -83.1(10)  |
| Os(1)-N(1)-C(11)-C(12)  | 2.6(5)    | C(23)-C(22)-C(27)-C(29)   | -57.9(5)   |
| Os(1A)-N(1)-C(11)-C(12) | -5.6(5)   | C(21)-C(22)-C(27)-C(29)   | 112.2(5)   |
| N(1)-C(11)-C(12)-P(2)   | 0.4(5)    | C(23)-C(22)-C(27)-C(30)   | -177.3(3)  |
| C(13)-P(2)-C(12)-C(11)  | -128.8(3) | C(21)-C(22)-C(27)-C(30)   | -7.2(5)    |
| C(17)-P(2)-C(12)-C(11)  | 118.6(3)  | C(23)-C(22)-C(27)-C(28)   | 61.9(5)    |
| Os(1A)-P(2)-C(12)-C(11) | 4.1(4)    | C(21)-C(22)-C(27)-C(28)   | -128.0(4)  |
| Os(1)-P(2)-C(12)-C(11)  | -2.5(3)   | C(23)-C(22)-C(27)-C(29A)  | -127.3(9)  |
| C(12)-P(2)-C(13)-C(16)  | 171.2(3)  | C(21)-C(22)-C(27)-C(29A)  | 42.8(9)    |
| C(17)-P(2)-C(13)-C(16)  | -80.6(3)  | C(23)-C(22)-C(27)-C(30A)  | -17.4(10)  |
| Os(1A)-P(2)-C(13)-C(16) | 54.5(4)   | C(21)-C(22)-C(27)-C(30A)  | 152.7(10)  |
| Os(1)-P(2)-C(13)-C(16)  | 61.0(4)   | C(23)-C(24)-C(31)-C(34)   | 177.1(3)   |
| C(12)-P(2)-C(13)-C(14)  | 52.8(3)   | C(25)-C(24)-C(31)-C(34)   | -1.2(5)    |
| C(17)-P(2)-C(13)-C(14)  | 161.0(3)  | C(23)-C(24)-C(31)-C(32)   | -63.7(4)   |
| Os(1A)-P(2)-C(13)-C(14) | -63.9(4)  | C(25)-C(24)-C(31)-C(32)   | 118.0(4)   |
| Os(1)-P(2)-C(13)-C(14)  | -57.5(3)  | C(23)-C(24)-C(31)-C(33)   | 54.6(4)    |
| C(12)-P(2)-C(13)-C(15)  | -67.2(4)  | C(25)-C(24)-C(31)-C(33)   | -123.7(4)  |
| C(17)-P(2)-C(13)-C(15)  | 41.1(4)   | C(25)-C(26)-C(35)-C(36)   | 125.6(3)   |
| Os(1A)-P(2)-C(13)-C(15) | 176.1(4)  | C(21)-C(26)-C(35)-C(36)   | -50.8(4)   |
| Os(1)-P(2)-C(13)-C(15)  | -177.4(3) | C(25)-C(26)-C(35)-C(37)   | -110.5(3)  |
| C(12)-P(2)-C(17)-C(19)  | 172.9(2)  | C(21)-C(26)-C(35)-C(37)   | 73.1(4)    |
| C(13)-P(2)-C(17)-C(19)  | 64.1(3)   | C(25)-C(26)-C(35)-C(38)   | 9.6(4)     |
| Os(1A)-P(2)-C(17)-C(19) | -78.7(3)  | C(41)-C(26)-C(35)-C(38)   | -166.9(3)  |
| Os(1)-P(2)-C(17)-C(19)  | -79.4(3)  | C(43)-C(42)-C(41)-C(40)   | 173.0(16)  |
| C(12)-P(2)-C(17)-C(18)  | -68.1(2)  | C(39)-C(40)-C(41)-C(42)   | -178.8(14) |
| C(13)-P(2)-C(17)-C(18)  | -176.9(2) | C(11)-N(1)-C(1)-C(2)      | 172.4(3)   |
| Os(1A)-P(2)-C(17)-C(18) | 40.3(3)   | Os(1)-N(1)-C(1)-C(2)      | -4.0(5)    |
| Os(1)-P(2)-C(17)-C(18)  | 39.6(3)   | N(1)-C(1)-C(2)-P(1)       | -1.3(5)    |
| C(12)-P(2)-C(17)-C(20)  | 47.6(3)   | C(3)-P(1)-C(2)-C(1)       | 131.9(3)   |
| C(13)-P(2)-C(17)-C(20)  | -61.2(3)  | C(7)-P(1)-C(2)-C(1)       | -115.3(3)  |
| Os(1A)-P(2)-C(17)-C(20) | 155.9(4)  | Os(1)-P(1)-C(2)-C(1)      | 4.7(3)     |
| Os(1)-P(2)-C(17)-C(20)  | 155.2(3)  | C(11)-N(1)-C(1A)-C(2A)    | -170(3)    |
| Os(1A)-P(3)-C(21)-C(22) | 86.2(4)   | Os(1A)-N(1)-C(1A)-C(2A)   | 1(6)       |
| Os(1)-P(3)-C(21)-C(22)  | 75.8(3)   | N(1)-C(1A)-C(2A)-P(1A)    | -2(6)      |
| Os(1A)-P(3)-C(21)-C(26) | -83.3(4)  | C(1A)-C(2A)-P(1A)-C(7A)   | -122(4)    |
| Os(1)-P(3)-C(21)-C(26)  | -93.7(3)  | C(1A)-C(2A)-P(1A)-C(3A)   | 122(4)     |
| C(26)-C(21)-C(22)-C(23) | 18.1(4)   | C(1A)-C(2A)-P(1A)-Os(1A)  | 2(4)       |
| P(3)-C(21)-C(22)-C(23)  | -151.8(2) | C(9A)-C(7A)-P(1A)-C(2A)   | 40(3)      |
| C(26)-C(21)-C(22)-C(27) | -151.8(3) | C(8A)-C(7A)-P(1A)-C(2A)   | 157(3)     |
| P(3)-C(21)-C(22)-C(27)  | 38.3(4)   | C(10A)-C(7A)-P(1A)-C(2A)  | -83(3)     |
| C(21)-C(22)-C(23)-C(24) | -4.8(5)   | C(9A)-C(7A)-P(1A)-C(3A)   | 150(3)     |
| C(27)-C(22)-C(23)-C(24) | 165.9(3)  | C(8A)-C(7A)-P(1A)-C(3A)   | -93(3)     |
| C(22)-C(23)-C(24)-C(25) | -9.1(5)   | C(10A)-C(7A)-P(1A)-C(3A)  | 28(3)      |
| C(22)-C(23)-C(24)-C(31) | 172.5(3)  | C(9A)-C(7A)-P(1A)-Os(1A)  | -70(3)     |
| C(23)-C(24)-C(25)-C(26) | 10.0(4)   | C(8A)-C(7A)-P(1A)-Os(1A)  | 47(3)      |
| C(31)-C(24)-C(25)-C(26) | -171.7(3) | C(10A)-C(7A)-P(1A)-Os(1A) | 168(3)     |
| C(24)-C(25)-C(26)-C(21) | 3.2(4)    |                           |            |
| C(24)-C(25)-C(26)-C(35) | -173.5(3) |                           |            |
| C(22)-C(21)-C(26)-C(25) | -17.3(4)  |                           |            |
| P(3)-C(21)-C(26)-C(25)  | 152.4(2)  |                           |            |
| C(22)-C(21)-C(26)-C(35) | 159.1(3)  |                           |            |
| P(3)-C(21)-C(26)-C(35)  | -31.2(4)  |                           |            |

---

Symmetry transformations used to generate equivalent atoms:

X-ray Single-Crystal Structure Analysis of **5**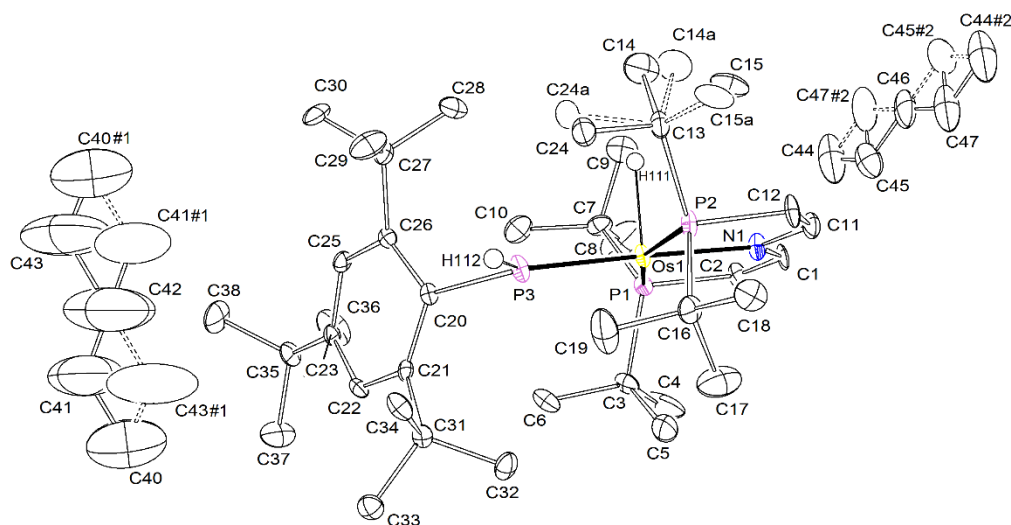

**Figure S29.** Thermal ellipsoid plot of **5** with the anisotropic displacement parameters drawn at the 50% probability level. The asymmetric unit contains one disordered complex molecule and two half pentane solvent molecules located at special positions. The disordered complex molecule was refined with population of 0.71(1) on the main domain using some restraints (SADI) and constraints (EADP). The Os-H and P-H hydrogen atoms were found from the residual density map and isotropically refined.

**Table S11.** Crystal data and structure refinement for **5**.

|                                        |                                                                    |                             |
|----------------------------------------|--------------------------------------------------------------------|-----------------------------|
| Identification code                    | mo_CW_JA_290517_0m (JA-MN-29)                                      |                             |
| Empirical formula                      | $C_{43}H_{83}NOsP_3$                                               |                             |
| Formula weight                         | 897.21                                                             |                             |
| Temperature                            | 100(2) K                                                           |                             |
| Wavelength                             | 0.71073 Å                                                          |                             |
| Crystal system                         | Monoclinic                                                         |                             |
| Space group                            | $P2_1/n$                                                           |                             |
| Unit cell dimensions                   | $a = 14.2026(6)$ Å                                                 | $\alpha = 90^\circ$         |
|                                        | $b = 15.4095(7)$ Å                                                 | $\beta = 97.2097(18)^\circ$ |
|                                        | $c = 21.0809(10)$ Å                                                | $\gamma = 90^\circ$         |
| Volume                                 | $4577.2(4)$ Å <sup>3</sup>                                         |                             |
| Z                                      | 4                                                                  |                             |
| Density (calculated)                   | $1.302$ Mg/m <sup>3</sup>                                          |                             |
| Absorption coefficient                 | $2.918$ mm <sup>-1</sup>                                           |                             |
| F(000)                                 | 1876                                                               |                             |
| Crystal size                           | $0.238 \times 0.211 \times 0.162$ mm <sup>3</sup>                  |                             |
| Crystal shape and color                | Block,                                                             | dark green                  |
| Theta range for data collection        | $2.267$ to $27.976^\circ$                                          |                             |
| Index ranges                           | $-18 \leq h \leq 18$ , $-20 \leq k \leq 20$ , $-27 \leq l \leq 27$ |                             |
| Reflections collected                  | 124611                                                             |                             |
| Independent reflections                | 11010 [R(int) = 0.1202]                                            |                             |
| Completeness to theta = $25.242^\circ$ | 99.9 %                                                             |                             |
| Refinement method                      | Full-matrix least-squares on $F^2$                                 |                             |

---

|                                      |                                     |              |  |
|--------------------------------------|-------------------------------------|--------------|--|
| Data / restraints / parameters       | 11010 / 45 / 498                    |              |  |
| Goodness-of-fit on $F^2$             | 1.053                               |              |  |
| Final R indices [ $I > 2\sigma(I)$ ] | R1 = 0.0416,                        | wR2 = 0.0531 |  |
| R indices (all data)                 | R1 = 0.1021,                        | wR2 = 0.0636 |  |
| Largest diff. peak and hole          | 0.695 and -0.830 $e\text{\AA}^{-3}$ |              |  |

Table S12. Bond lengths [Å] and angles [°] for 5.

|                   |            |                     |            |
|-------------------|------------|---------------------|------------|
| N(1)-C(11)        | 1.373(6)   | P(2)-Os(1)-H(111)   | 88(2)      |
| N(1)-C(1)         | 1.392(5)   | P(1)-Os(1)-H(111)   | 93(2)      |
| N(1)-Os(1)        | 2.069(4)   | C(12)-P(2)-C(13)    | 103.0(2)   |
| Os(1)-P(3)        | 2.2301(13) | C(12)-P(2)-C(16)    | 102.2(2)   |
| Os(1)-P(2)        | 2.3537(13) | C(13)-P(2)-C(16)    | 110.7(2)   |
| Os(1)-P(1)        | 2.3723(12) | C(12)-P(2)-Os(1)    | 101.18(16) |
| Os(1)-H(111)      | 1.69(6)    | C(13)-P(2)-Os(1)    | 120.19(15) |
| P(2)-C(12)        | 1.786(5)   | C(16)-P(2)-Os(1)    | 116.19(15) |
| P(2)-C(13)        | 1.890(5)   | C(2)-P(1)-C(7)      | 102.9(2)   |
| P(2)-C(16)        | 1.898(5)   | C(2)-P(1)-C(3)      | 102.3(2)   |
| P(1)-C(2)         | 1.788(4)   | C(7)-P(1)-C(3)      | 111.2(2)   |
| P(1)-C(7)         | 1.871(5)   | C(2)-P(1)-Os(1)     | 101.04(14) |
| P(1)-C(3)         | 1.885(5)   | C(7)-P(1)-Os(1)     | 120.80(15) |
| P(3)-C(20)        | 1.860(4)   | C(3)-P(1)-Os(1)     | 115.22(15) |
| P(3)-H(112)       | 1.33(5)    | C(20)-P(3)-Os(1)    | 137.38(14) |
| C(1)-C(2)         | 1.332(6)   | C(20)-P(3)-H(112)   | 101(2)     |
| C(3)-C(4)         | 1.516(6)   | Os(1)-P(3)-H(112)   | 122(2)     |
| C(3)-C(6)         | 1.521(6)   | C(2)-C(1)-N(1)      | 121.5(4)   |
| C(3)-C(5)         | 1.541(7)   | C(1)-C(2)-P(1)      | 115.7(3)   |
| C(7)-C(9)         | 1.521(7)   | C(4)-C(3)-C(6)      | 111.0(4)   |
| C(7)-C(10)        | 1.529(7)   | C(4)-C(3)-C(5)      | 107.5(5)   |
| C(7)-C(8)         | 1.535(7)   | C(6)-C(3)-C(5)      | 109.0(4)   |
| C(11)-C(12)       | 1.338(6)   | C(4)-C(3)-P(1)      | 114.0(3)   |
| C(13)-C(14)       | 1.530(8)   | C(6)-C(3)-P(1)      | 110.9(3)   |
| C(13)-C(15A)      | 1.534(14)  | C(5)-C(3)-P(1)      | 104.0(3)   |
| C(13)-C(24)       | 1.540(7)   | C(9)-C(7)-C(10)     | 107.8(4)   |
| C(13)-C(24A)      | 1.544(12)  | C(9)-C(7)-C(8)      | 108.2(4)   |
| C(13)-C(15)       | 1.546(8)   | C(10)-C(7)-C(8)     | 108.8(4)   |
| C(13)-C(14A)      | 1.554(14)  | C(9)-C(7)-P(1)      | 106.1(4)   |
| C(16)-C(19)       | 1.522(7)   | C(10)-C(7)-P(1)     | 110.9(3)   |
| C(16)-C(18)       | 1.523(6)   | C(8)-C(7)-P(1)      | 114.7(3)   |
| C(16)-C(17)       | 1.533(7)   | C(12)-C(11)-N(1)    | 121.6(4)   |
| C(20)-C(21)       | 1.415(5)   | C(11)-C(12)-P(2)    | 115.3(4)   |
| C(20)-C(26)       | 1.433(6)   | C(14)-C(13)-C(24)   | 109.7(6)   |
| C(21)-C(22)       | 1.404(6)   | C(15A)-C(13)-C(24A) | 115.1(15)  |
| C(21)-C(31)       | 1.564(6)   | C(14)-C(13)-C(15)   | 107.4(5)   |
| C(22)-C(23)       | 1.385(6)   | C(24)-C(13)-C(15)   | 107.0(5)   |
| C(23)-C(25)       | 1.387(6)   | C(15A)-C(13)-C(14A) | 107.1(14)  |
| C(23)-C(35)       | 1.529(6)   | C(24A)-C(13)-C(14A) | 100.6(13)  |
| C(25)-C(26)       | 1.389(6)   | C(14)-C(13)-P(2)    | 107.7(5)   |
| C(26)-C(27)       | 1.561(6)   | C(15A)-C(13)-P(2)   | 114.6(15)  |
| C(27)-C(28)       | 1.538(6)   | C(24)-C(13)-P(2)    | 112.2(4)   |
| C(27)-C(29)       | 1.538(6)   | C(24A)-C(13)-P(2)   | 114.0(7)   |
| C(27)-C(30)       | 1.540(6)   | C(15)-C(13)-P(2)    | 112.8(5)   |
| C(31)-C(32)       | 1.532(6)   | C(14A)-C(13)-P(2)   | 103.4(14)  |
| C(31)-C(33)       | 1.541(6)   | C(19)-C(16)-C(18)   | 109.8(4)   |
| C(31)-C(34)       | 1.547(6)   | C(19)-C(16)-C(17)   | 107.2(4)   |
| C(35)-C(37)       | 1.527(6)   | C(18)-C(16)-C(17)   | 109.0(4)   |
| C(35)-C(38)       | 1.537(6)   | C(19)-C(16)-P(2)    | 113.6(3)   |
| C(35)-C(36)       | 1.539(7)   | C(18)-C(16)-P(2)    | 112.7(3)   |
| C(41)-C(42)       | 1.22(2)    | C(17)-C(16)-P(2)    | 104.1(3)   |
| C(41)-C(40)       | 1.40(2)    | C(21)-C(20)-C(26)   | 118.2(4)   |
| C(43)-C(40)#1     | 1.21(2)    | C(21)-C(20)-P(3)    | 120.8(3)   |
| C(43)-C(42)       | 1.47(2)    | C(26)-C(20)-P(3)    | 120.5(3)   |
| C(45)-C(44)       | 1.381(14)  | C(22)-C(21)-C(20)   | 118.4(4)   |
| C(45)-C(46)       | 1.499(12)  | C(22)-C(21)-C(31)   | 117.3(4)   |
| C(47)-C(46)       | 1.352(14)  | C(20)-C(21)-C(31)   | 123.9(4)   |
| C(47)-C(44)#2     | 1.470(16)  | C(23)-C(22)-C(21)   | 122.3(4)   |
| C(11)-N(1)-C(1)   | 116.7(4)   | C(22)-C(23)-C(25)   | 117.1(4)   |
| C(11)-N(1)-Os(1)  | 121.6(3)   | C(22)-C(23)-C(35)   | 122.6(4)   |
| C(1)-N(1)-Os(1)   | 121.6(3)   | C(25)-C(23)-C(35)   | 120.2(4)   |
| N(1)-Os(1)-P(3)   | 172.17(11) | C(23)-C(25)-C(26)   | 123.1(4)   |
| N(1)-Os(1)-P(2)   | 80.18(10)  | C(25)-C(26)-C(20)   | 117.8(4)   |
| P(3)-Os(1)-P(2)   | 92.57(4)   | C(25)-C(26)-C(27)   | 118.0(4)   |
| N(1)-Os(1)-P(1)   | 80.09(10)  | C(20)-C(26)-C(27)   | 123.7(4)   |
| P(3)-Os(1)-P(1)   | 107.03(5)  | C(28)-C(27)-C(29)   | 110.5(4)   |
| P(2)-Os(1)-P(1)   | 160.20(4)  | C(28)-C(27)-C(30)   | 106.2(4)   |
| N(1)-Os(1)-H(111) | 88(2)      | C(29)-C(27)-C(30)   | 105.4(4)   |
| P(3)-Os(1)-H(111) | 95(2)      | C(28)-C(27)-C(26)   | 114.3(4)   |
|                   |            | C(29)-C(27)-C(26)   | 108.7(4)   |
|                   |            | C(30)-C(27)-C(26)   | 111.4(3)   |
|                   |            | C(32)-C(31)-C(33)   | 106.0(4)   |

|                     |           |
|---------------------|-----------|
| C(32)-C(31)-C(34)   | 110.7(4)  |
| C(33)-C(31)-C(34)   | 105.5(3)  |
| C(32)-C(31)-C(21)   | 114.8(3)  |
| C(33)-C(31)-C(21)   | 111.6(3)  |
| C(34)-C(31)-C(21)   | 107.9(3)  |
| C(37)-C(35)-C(23)   | 112.9(4)  |
| C(37)-C(35)-C(38)   | 108.1(4)  |
| C(23)-C(35)-C(38)   | 110.4(4)  |
| C(37)-C(35)-C(36)   | 108.7(4)  |
| C(23)-C(35)-C(36)   | 108.1(4)  |
| C(38)-C(35)-C(36)   | 108.5(4)  |
| C(42)-C(41)-C(40)   | 130(2)    |
| C(40)#1-C(43)-C(42) | 124(3)    |
| C(44)-C(45)-C(46)   | 123.8(11) |
| C(46)-C(47)-C(44)#2 | 128.4(15) |
| C(41)-C(42)-C(43)   | 129.4(16) |
| C(47)-C(46)-C(45)   | 126.3(8)  |

Symmetry transformations used to generate equivalent atoms:

#1 -x+1,-y,-z+2 #2 -x,-y+1,-z

**Table S13.** Torsion angles [°] for 5.

|                         |            |
|-------------------------|------------|
| C(11)-N(1)-C(1)-C(2)    | -179.2(4)  |
| Os(1)-N(1)-C(1)-C(2)    | -2.3(6)    |
| N(1)-C(1)-C(2)-P(1)     | 0.2(6)     |
| C(7)-P(1)-C(2)-C(1)     | 126.9(4)   |
| C(3)-P(1)-C(2)-C(1)     | -117.7(4)  |
| Os(1)-P(1)-C(2)-C(1)    | 1.5(4)     |
| C(2)-P(1)-C(3)-C(4)     | -43.7(5)   |
| C(7)-P(1)-C(3)-C(4)     | 65.5(5)    |
| Os(1)-P(1)-C(3)-C(4)    | -152.3(4)  |
| C(2)-P(1)-C(3)-C(6)     | -169.8(3)  |
| C(7)-P(1)-C(3)-C(6)     | -60.6(4)   |
| Os(1)-P(1)-C(3)-C(6)    | 81.5(3)    |
| C(2)-P(1)-C(3)-C(5)     | 73.1(3)    |
| C(7)-P(1)-C(3)-C(5)     | -177.7(3)  |
| Os(1)-P(1)-C(3)-C(5)    | -35.6(3)   |
| C(2)-P(1)-C(7)-C(9)     | -65.9(4)   |
| C(3)-P(1)-C(7)-C(9)     | -174.8(3)  |
| Os(1)-P(1)-C(7)-C(9)    | 45.5(4)    |
| C(2)-P(1)-C(7)-C(10)    | 177.2(3)   |
| C(3)-P(1)-C(7)-C(10)    | 68.4(4)    |
| Os(1)-P(1)-C(7)-C(10)   | -71.4(4)   |
| C(2)-P(1)-C(7)-C(8)     | 53.5(4)    |
| C(3)-P(1)-C(7)-C(8)     | -55.4(4)   |
| Os(1)-P(1)-C(7)-C(8)    | 164.8(3)   |
| C(1)-N(1)-C(11)-C(12)   | 178.4(4)   |
| Os(1)-N(1)-C(11)-C(12)  | 1.5(6)     |
| N(1)-C(11)-C(12)-P(2)   | 1.1(6)     |
| C(13)-P(2)-C(12)-C(11)  | -127.5(4)  |
| C(16)-P(2)-C(12)-C(11)  | 117.6(4)   |
| Os(1)-P(2)-C(12)-C(11)  | -2.6(4)    |
| C(12)-P(2)-C(13)-C(14)  | 85.0(5)    |
| C(16)-P(2)-C(13)-C(14)  | -166.4(5)  |
| Os(1)-P(2)-C(13)-C(14)  | -26.3(5)   |
| C(12)-P(2)-C(13)-C(15A) | -52.5(11)  |
| C(16)-P(2)-C(13)-C(15A) | 56.1(11)   |
| Os(1)-P(2)-C(13)-C(15A) | -163.9(10) |
| C(12)-P(2)-C(13)-C(24)  | -154.2(4)  |
| C(16)-P(2)-C(13)-C(24)  | -45.6(5)   |
| Os(1)-P(2)-C(13)-C(24)  | 94.4(4)    |
| C(12)-P(2)-C(13)-C(24A) | 171.9(10)  |

|                           |            |
|---------------------------|------------|
| C(16)-P(2)-C(13)-C(24A)   | -79.5(10)  |
| Os(1)-P(2)-C(13)-C(24A)   | 60.6(10)   |
| C(12)-P(2)-C(13)-C(15)    | -33.3(5)   |
| C(16)-P(2)-C(13)-C(15)    | 75.3(5)    |
| Os(1)-P(2)-C(13)-C(15)    | -144.7(4)  |
| C(12)-P(2)-C(13)-C(14A)   | 63.7(10)   |
| C(16)-P(2)-C(13)-C(14A)   | 172.3(10)  |
| Os(1)-P(2)-C(13)-C(14A)   | -47.7(10)  |
| C(12)-P(2)-C(16)-C(19)    | 175.9(4)   |
| C(13)-P(2)-C(16)-C(19)    | 66.8(4)    |
| Os(1)-P(2)-C(16)-C(19)    | -75.0(4)   |
| C(12)-P(2)-C(16)-C(18)    | 50.2(4)    |
| C(13)-P(2)-C(16)-C(18)    | -58.9(4)   |
| Os(1)-P(2)-C(16)-C(18)    | 159.3(3)   |
| C(12)-P(2)-C(16)-C(17)    | -67.8(4)   |
| C(13)-P(2)-C(16)-C(17)    | -176.9(3)  |
| Os(1)-P(2)-C(16)-C(17)    | 41.4(4)    |
| Os(1)-P(3)-C(20)-C(21)    | 88.5(4)    |
| Os(1)-P(3)-C(20)-C(26)    | -83.3(4)   |
| C(26)-C(20)-C(21)-C(22)   | 17.8(6)    |
| P(3)-C(20)-C(21)-C(22)    | -154.2(3)  |
| C(26)-C(20)-C(21)-C(31)   | -155.3(4)  |
| P(3)-C(20)-C(21)-C(31)    | 32.7(5)    |
| C(20)-C(21)-C(22)-C(23)   | -4.5(6)    |
| C(31)-C(21)-C(22)-C(23)   | 169.0(4)   |
| C(21)-C(22)-C(23)-C(25)   | -9.1(6)    |
| C(21)-C(22)-C(23)-C(35)   | 174.4(4)   |
| C(22)-C(23)-C(25)-C(26)   | 9.6(6)     |
| C(35)-C(23)-C(25)-C(26)   | -173.9(4)  |
| C(23)-C(25)-C(26)-C(20)   | 3.6(6)     |
| C(23)-C(25)-C(26)-C(27)   | -168.8(4)  |
| C(21)-C(20)-C(26)-C(25)   | -17.3(6)   |
| P(3)-C(20)-C(26)-C(25)    | 154.7(3)   |
| C(21)-C(20)-C(26)-C(27)   | 154.6(4)   |
| P(3)-C(20)-C(26)-C(27)    | -33.4(5)   |
| C(25)-C(26)-C(27)-C(28)   | -109.2(5)  |
| C(20)-C(26)-C(27)-C(28)   | 78.8(5)    |
| C(25)-C(26)-C(27)-C(29)   | 126.8(4)   |
| C(20)-C(26)-C(27)-C(29)   | -45.1(5)   |
| C(25)-C(26)-C(27)-C(30)   | 11.1(5)    |
| C(20)-C(26)-C(27)-C(30)   | -160.8(4)  |
| C(22)-C(21)-C(31)-C(32)   | 111.2(4)   |
| C(20)-C(21)-C(31)-C(32)   | -75.6(5)   |
| C(22)-C(21)-C(31)-C(33)   | -9.4(5)    |
| C(20)-C(21)-C(31)-C(33)   | 163.8(4)   |
| C(22)-C(21)-C(31)-C(34)   | -124.8(4)  |
| C(20)-C(21)-C(31)-C(34)   | 48.3(5)    |
| C(22)-C(23)-C(35)-C(37)   | 2.6(6)     |
| C(25)-C(23)-C(35)-C(37)   | -173.8(4)  |
| C(22)-C(23)-C(35)-C(38)   | 123.7(5)   |
| C(25)-C(23)-C(35)-C(38)   | -52.7(6)   |
| C(22)-C(23)-C(35)-C(36)   | -117.7(5)  |
| C(25)-C(23)-C(35)-C(36)   | 65.9(5)    |
| C(40)-C(41)-C(42)-C(43)   | 168.9(18)  |
| C(40)#1-C(43)-C(42)-C(41) | 168(2)     |
| C(44)#2-C(47)-C(46)-C(45) | -175.7(10) |
| C(44)-C(45)-C(46)-C(47)   | -175.7(10) |

Symmetry transformations used to generate equivalent atoms:

#1 -x+1,-y,-z+2 #2 -x,-y+1,-z



X-ray Single-Crystal Structure Analysis of **8**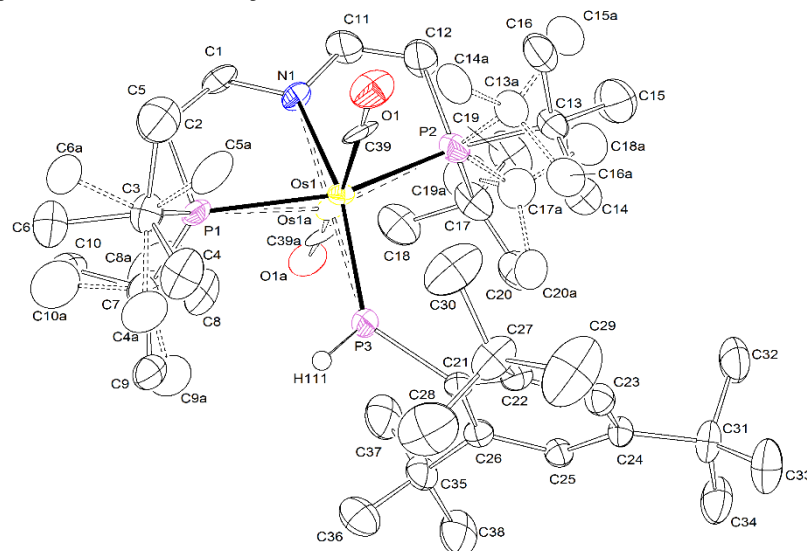

**Figure S30.** Thermal ellipsoid plot of **8** with the anisotropic displacement parameters drawn at the 50% probability level. The asymmetric unit contains one disordered complex molecule. The disordered complex molecule was refined with population of 0.682(7) on the main domain using some restraints and constraints (RIGU, SADI, EADP). The P-H hydrogen atom was found from the residual density map and isotropically refined. The structure was refined as an inversion twin using the twin law -100 0-10 00-1 (BASF: 0.061(16)). The reflections -2 2 4, 1 4 4, 0 1 9 and -2 1 10 are removed from the refinement using OMIT commands.

**Table S14.** Crystal data and structure refinement for **8**.

|                                        |                                                                    |                     |
|----------------------------------------|--------------------------------------------------------------------|---------------------|
| Identification code                    | CW_JA_041217_a (JA-vi-16)                                          |                     |
| Empirical formula                      | $C_{39}H_{70}NOOsP_3$                                              |                     |
| Formula weight                         | 852.07                                                             |                     |
| Temperature                            | 100(2) K                                                           |                     |
| Wavelength                             | 0.71073 Å                                                          |                     |
| Crystal system                         | Orthorhombic                                                       |                     |
| Space group                            | $P2_12_12_1$                                                       |                     |
| Unit cell dimensions                   | $a = 20.1894(14)$ Å                                                | $\alpha = 90^\circ$ |
|                                        | $b = 11.4930(8)$ Å                                                 | $\beta = 90^\circ$  |
|                                        | $c = 17.4542(14)$ Å                                                | $\gamma = 90^\circ$ |
| Volume                                 | $4050.0(5)$ Å <sup>3</sup>                                         |                     |
| Z                                      | 4                                                                  |                     |
| Density (calculated)                   | $1.397$ Mg/m <sup>3</sup>                                          |                     |
| Absorption coefficient                 | $3.296$ mm <sup>-1</sup>                                           |                     |
| F(000)                                 | 1760                                                               |                     |
| Crystal size                           | $0.265 \times 0.178 \times 0.120$ mm <sup>3</sup>                  |                     |
| Crystal shape and color                | Block,                                                             | clear intense red   |
| Theta range for data collection        | $2.331$ to $28.424^\circ$                                          |                     |
| Index ranges                           | $-26 \leq h \leq 26$ , $-15 \leq k \leq 15$ , $-23 \leq l \leq 23$ |                     |
| Reflections collected                  | 79045                                                              |                     |
| Independent reflections                | 10098 [R(int) = 0.1626]                                            |                     |
| Completeness to theta = $25.242^\circ$ | 99.9 %                                                             |                     |
| Refinement method                      | Full-matrix least-squares on $F^2$                                 |                     |



---

|                                      |                                   |              |
|--------------------------------------|-----------------------------------|--------------|
| Data / restraints / parameters       | 10098 / 396 / 559                 |              |
| Goodness-of-fit on $F^2$             | 1.155                             |              |
| Final R indices [ $I > 2\sigma(I)$ ] | R1 = 0.0588,                      | wR2 = 0.1161 |
| R indices (all data)                 | R1 = 0.0762,                      | wR2 = 0.1245 |
| Absolute structure parameter         | 0.061(16)                         |              |
| Largest diff. peak and hole          | 1.550 and -2.048 eÅ <sup>-3</sup> |              |

**Table S15.** Bond lengths [Å] and angles [°] for **8**.

|                |           |                   |           |
|----------------|-----------|-------------------|-----------|
| C(1)-C(2)      | 1.34(2)   | C(1)-C(2)-P(1)    | 116.7(10) |
| C(1)-N(1)      | 1.348(15) | C(6A)-C(3)-C(5A)  | 111(2)    |
| C(2)-P(1)      | 1.750(12) | C(4)-C(3)-C(6)    | 108.6(14) |
| C(3)-C(6A)     | 1.44(4)   | C(4)-C(3)-C(5)    | 107.4(15) |
| C(3)-C(4)      | 1.44(2)   | C(6)-C(3)-C(5)    | 103.6(13) |
| C(3)-C(5A)     | 1.48(5)   | C(6A)-C(3)-C(4A)  | 110(2)    |
| C(3)-C(6)      | 1.53(2)   | C(5A)-C(3)-C(4A)  | 102(3)    |
| C(3)-C(5)      | 1.59(2)   | C(6A)-C(3)-P(1)   | 119.6(18) |
| C(3)-C(4A)     | 1.65(4)   | C(4)-C(3)-P(1)    | 115.4(9)  |
| C(3)-P(1)      | 1.874(12) | C(5A)-C(3)-P(1)   | 103(2)    |
| C(7)-C(10)     | 1.494(16) | C(6)-C(3)-P(1)    | 114.0(11) |
| C(7)-C(9)      | 1.527(17) | C(5)-C(3)-P(1)    | 107.0(11) |
| C(7)-C(9A)     | 1.53(2)   | C(4A)-C(3)-P(1)   | 109.0(16) |
| C(7)-C(8A)     | 1.54(2)   | C(10)-C(7)-C(9)   | 111.8(13) |
| C(7)-C(8)      | 1.556(17) | C(9A)-C(7)-C(8A)  | 108.0(19) |
| C(7)-C(10A)    | 1.58(2)   | C(10)-C(7)-C(8)   | 108.4(12) |
| C(7)-P(1)      | 1.885(15) | C(9)-C(7)-C(8)    | 106.4(11) |
| C(11)-N(1)     | 1.328(16) | C(9A)-C(7)-C(10A) | 105.6(18) |
| C(11)-C(12)    | 1.35(2)   | C(8A)-C(7)-C(10A) | 104.3(18) |
| C(12)-P(2)     | 1.776(13) | C(10)-C(7)-P(1)   | 114.2(10) |
| C(21)-C(22)    | 1.417(15) | C(9)-C(7)-P(1)    | 111.5(12) |
| C(21)-C(26)    | 1.426(13) | C(9A)-C(7)-P(1)   | 118(2)    |
| C(21)-P(3)     | 1.853(11) | C(8A)-C(7)-P(1)   | 113(3)    |
| C(22)-C(23)    | 1.408(15) | C(8)-C(7)-P(1)    | 104.0(11) |
| C(22)-C(27)    | 1.553(15) | C(10A)-C(7)-P(1)  | 107(2)    |
| C(23)-C(24)    | 1.390(15) | N(1)-C(11)-C(12)  | 122.6(11) |
| C(24)-C(25)    | 1.374(15) | C(11)-C(12)-P(2)  | 115.4(9)  |
| C(24)-C(31)    | 1.519(15) | C(22)-C(21)-C(26) | 118.8(9)  |
| C(25)-C(26)    | 1.405(14) | C(22)-C(21)-P(3)  | 122.2(7)  |
| C(26)-C(35)    | 1.506(15) | C(26)-C(21)-P(3)  | 118.5(8)  |
| C(27)-C(29)    | 1.49(2)   | C(23)-C(22)-C(21) | 118.0(10) |
| C(27)-C(30)    | 1.513(19) | C(23)-C(22)-C(27) | 116.9(11) |
| C(27)-C(28)    | 1.53(2)   | C(21)-C(22)-C(27) | 124.3(10) |
| C(31)-C(33)    | 1.517(17) | C(24)-C(23)-C(22) | 122.5(10) |
| C(31)-C(34)    | 1.53(2)   | C(25)-C(24)-C(23) | 116.5(10) |
| C(31)-C(32)    | 1.54(2)   | C(25)-C(24)-C(31) | 123.1(10) |
| C(35)-C(36)    | 1.503(17) | C(23)-C(24)-C(31) | 120.4(10) |
| C(35)-C(38)    | 1.551(15) | C(24)-C(25)-C(26) | 124.0(9)  |
| C(35)-C(37)    | 1.56(2)   | C(25)-C(26)-C(21) | 117.0(10) |
| N(1)-Os(1A)    | 2.120(9)  | C(25)-C(26)-C(35) | 116.7(9)  |
| N(1)-Os(1)     | 2.141(9)  | C(21)-C(26)-C(35) | 125.6(10) |
| P(1)-Os(1A)    | 2.342(4)  | C(29)-C(27)-C(30) | 108.7(14) |
| P(1)-Os(1)     | 2.443(3)  | C(29)-C(27)-C(28) | 103.8(16) |
| P(2)-C(17A)    | 1.85(2)   | C(30)-C(27)-C(28) | 108.0(13) |
| P(2)-C(13)     | 1.883(14) | C(29)-C(27)-C(22) | 111.8(12) |
| P(2)-C(13A)    | 1.91(2)   | C(30)-C(27)-C(22) | 117.2(11) |
| P(2)-C(17)     | 1.923(14) | C(28)-C(27)-C(22) | 106.5(11) |
| P(2)-Os(1)     | 2.372(3)  | C(33)-C(31)-C(24) | 112.4(10) |
| P(2)-Os(1A)    | 2.462(4)  | C(33)-C(31)-C(34) | 109.8(13) |
| P(3)-Os(1A)    | 2.245(4)  | C(24)-C(31)-C(34) | 112.1(11) |
| P(3)-Os(1)     | 2.264(3)  | C(33)-C(31)-C(32) | 107.8(12) |
| P(3)-H(111)    | 1.31(12)  | C(24)-C(31)-C(32) | 106.5(10) |
| C(13)-C(14)    | 1.511(18) | C(34)-C(31)-C(32) | 108.1(12) |
| C(13)-C(15)    | 1.520(17) | C(36)-C(35)-C(26) | 110.0(11) |
| C(13)-C(16)    | 1.526(17) | C(36)-C(35)-C(38) | 105.9(10) |
| C(17)-C(20)    | 1.508(19) | C(26)-C(35)-C(38) | 114.6(10) |
| C(17)-C(19)    | 1.515(18) | C(36)-C(35)-C(37) | 109.8(12) |
| C(17)-C(18)    | 1.522(19) | C(26)-C(35)-C(37) | 113.3(9)  |
| C(39)-O(1)     | 1.24(2)   | C(38)-C(35)-C(37) | 102.8(12) |
| C(39)-Os(1)    | 1.761(16) | C(11)-N(1)-C(1)   | 119.3(10) |
| C(13A)-C(16A)  | 1.52(2)   | C(11)-N(1)-Os(1A) | 123.8(9)  |
| C(13A)-C(15A)  | 1.53(2)   | C(1)-N(1)-Os(1A)  | 116.8(8)  |
| C(13A)-C(14A)  | 1.54(2)   | C(11)-N(1)-Os(1)  | 120.1(9)  |
| C(17A)-C(20A)  | 1.49(2)   | C(1)-N(1)-Os(1)   | 119.4(8)  |
| C(17A)-C(18A)  | 1.49(2)   | C(2)-P(1)-C(3)    | 104.8(6)  |
| C(17A)-C(19A)  | 1.49(2)   | C(2)-P(1)-C(7)    | 102.7(6)  |
| C(39A)-O(1A)   | 1.29(5)   | C(3)-P(1)-C(7)    | 109.3(6)  |
| C(39A)-Os(1A)  | 1.72(4)   | C(2)-P(1)-Os(1A)  | 100.1(5)  |
|                |           | C(3)-P(1)-Os(1A)  | 128.6(5)  |
|                |           | C(7)-P(1)-Os(1A)  | 108.0(4)  |
|                |           | C(2)-P(1)-Os(1)   | 100.2(5)  |
| C(2)-C(1)-N(1) | 124.1(10) | C(3)-P(1)-Os(1)   | 117.6(4)  |



|                         |            |                           |            |
|-------------------------|------------|---------------------------|------------|
| C(8A)-C(7)-P(1)-C(3)    | 157(2)     | Os(1)-P(2)-C(13)-C(14)    | 53.5(12)   |
| C(8)-C(7)-P(1)-C(3)     | -168.7(9)  | C(12)-P(2)-C(13)-C(15)    | -69.0(13)  |
| C(10A)-C(7)-P(1)-C(3)   | 43(2)      | C(17)-P(2)-C(13)-C(15)    | 39.2(13)   |
| C(9A)-C(7)-P(1)-Os(1A)  | 68(2)      | Os(1)-P(2)-C(13)-C(15)    | 176.9(10)  |
| C(8A)-C(7)-P(1)-Os(1A)  | -59(2)     | C(12)-P(2)-C(13)-C(16)    | 50.5(12)   |
| C(10A)-C(7)-P(1)-Os(1A) | -173.1(19) | C(17)-P(2)-C(13)-C(16)    | 158.8(11)  |
| C(10)-C(7)-P(1)-Os(1)   | -147.0(9)  | Os(1)-P(2)-C(13)-C(16)    | -63.5(11)  |
| C(9)-C(7)-P(1)-Os(1)    | 85.1(10)   | C(12)-P(2)-C(17A)-C(20A)  | -166(2)    |
| C(8)-C(7)-P(1)-Os(1)    | -29.1(10)  | C(13A)-P(2)-C(17A)-C(20A) | 87(2)      |
| C(11)-C(12)-P(2)-C(17A) | 131.9(18)  | Os(1A)-P(2)-C(17A)-C(20A) | -48(3)     |
| C(11)-C(12)-P(2)-C(13)  | -142.9(13) | C(12)-P(2)-C(17A)-C(18A)  | 68(2)      |
| C(11)-C(12)-P(2)-C(13A) | -110.7(16) | C(13A)-P(2)-C(17A)-C(18A) | -38(3)     |
| C(11)-C(12)-P(2)-C(17)  | 105.0(14)  | Os(1A)-P(2)-C(17A)-C(18A) | -173.7(19) |
| C(11)-C(12)-P(2)-Os(1)  | -12.9(14)  | C(12)-P(2)-C(17A)-C(19A)  | -49(2)     |
| C(11)-C(12)-P(2)-Os(1A) | -0.6(14)   | C(13A)-P(2)-C(17A)-C(19A) | -155(2)    |
| C(22)-C(21)-P(3)-Os(1A) | 90.6(9)    | Os(1A)-P(2)-C(17A)-C(19A) | 69(2)      |
| C(26)-C(21)-P(3)-Os(1A) | -81.2(9)   |                           |            |
| C(22)-C(21)-P(3)-Os(1)  | 72.3(10)   |                           |            |
| C(26)-C(21)-P(3)-Os(1)  | -99.5(8)   |                           |            |
| C(12)-P(2)-C(13)-C(14)  | 167.5(11)  |                           |            |
| C(17)-P(2)-C(13)-C(14)  | -84.2(11)  |                           |            |

---

Symmetry transformations used to generate equivalent atoms:

X-ray Single-Crystal Structure Analysis of **9**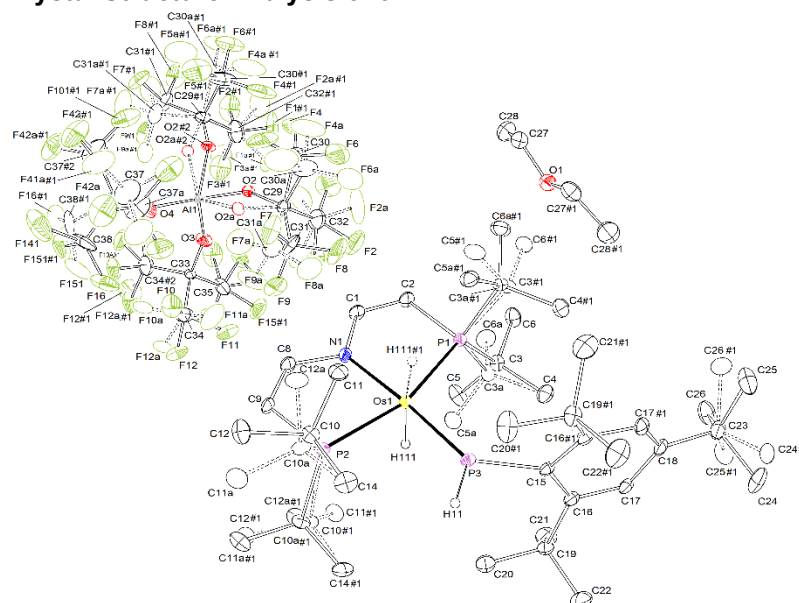

**Figure S31.** Thermal ellipsoid plot of **9** with the anisotropic displacement parameters drawn at the 50% probability level. The asymmetric unit contains a half disordered complex molecule, a half disordered  $[\text{Al}(\text{OC}(\text{CF}_3)_3)_4]^-$  anion and a half diethyl ether solvent molecule. The disorder was refined with site occupation factors of 0.5 for both sites using PART commands and some restraints and constraints (SADI, RIGU, EADP). The Os-H hydrogen atom was found from the residual density map and isotropically refined using DFIX.

**Table S17.** Crystal data and structure refinement for **9**.

|                                 |                                                                    |                            |
|---------------------------------|--------------------------------------------------------------------|----------------------------|
| Identification code             | mo_CW_JA_180917_2_0m_a (JA-v-75)                                   |                            |
| Empirical formula               | $\text{C}_{58}\text{H}_{81}\text{AlF}_{36}\text{NO}_5\text{OsP}_3$ |                            |
| Formula weight                  | 1866.32                                                            |                            |
| Temperature                     | 100(2) K                                                           |                            |
| Wavelength                      | 0.71073 Å                                                          |                            |
| Crystal system                  | Monoclinic                                                         |                            |
| Space group                     | $P2_1/m$                                                           |                            |
| Unit cell dimensions            | $a = 14.9152(8)$ Å                                                 | $\alpha = 90^\circ$        |
|                                 | $b = 15.4377(8)$ Å                                                 | $\beta = 107.823(2)^\circ$ |
|                                 | $c = 16.7109(9)$ Å                                                 | $\gamma = 90^\circ$        |
| Volume                          | $3663.1(3)$ Å <sup>3</sup>                                         |                            |
| Z                               | 2                                                                  |                            |
| Density (calculated)            | $1.692$ Mg/m <sup>3</sup>                                          |                            |
| Absorption coefficient          | $1.955$ mm <sup>-1</sup>                                           |                            |
| F(000)                          | 1868                                                               |                            |
| Crystal size                    | $0.513 \times 0.242 \times 0.128$ mm <sup>3</sup>                  |                            |
| Theta range for data collection | 2.195 to 28.443°.                                                  |                            |
| Index ranges                    | $-19 \leq h \leq 19$ , $-20 \leq k \leq 20$ , $-22 \leq l \leq 22$ |                            |
| Reflections collected           | 99819                                                              |                            |
| Independent reflections         | 9531 [R(int) = 0.0648]                                             |                            |
| Completeness to theta = 25.242° | 99.9 %                                                             |                            |
| Refinement method               | Full-matrix least-squares on F <sup>2</sup>                        |                            |

---

|                                      |                                   |
|--------------------------------------|-----------------------------------|
| Data / restraints / parameters       | 9531 / 301 / 741                  |
| Goodness-of-fit on $F^2$             | 1.086                             |
| Final R indices [ $I > 2\sigma(I)$ ] | R1 = 0.0508, wR2 = 0.1312         |
| R indices (all data)                 | R1 = 0.0573, wR2 = 0.1378         |
| Extinction coefficient               | n/a                               |
| Largest diff. peak and hole          | 1.562 and -1.653 eÅ <sup>-3</sup> |

**Table S18.** Bond lengths [Å] and angles [°] for **9**.

|                |            |                     |           |
|----------------|------------|---------------------|-----------|
| N(1)-C(1)      | 1.391(8)   | P(3)-H(11)          | 1.27(7)   |
| N(1)-C(8)      | 1.407(8)   | Os(1)-H(111)        | 1.59(2)   |
| N(1)-Os(1)     | 2.004(5)   | Al(1)-O(2A)#2       | 1.690(7)  |
| C(1)-C(2)      | 1.317(10)  | Al(1)-O(2A)         | 1.690(7)  |
| C(2)-P(1)      | 1.802(6)   | Al(1)-O(4)          | 1.709(6)  |
| C(4)-C(3)      | 1.46(3)    | Al(1)-O(3)          | 1.727(5)  |
| C(4)-C(3A)     | 1.56(3)    | Al(1)-O(2)          | 1.740(7)  |
| C(8)-C(9)      | 1.327(9)   | Al(1)-O(2)#2        | 1.740(7)  |
| C(9)-P(2)      | 1.798(6)   | O(1)-C(27)#1        | 1.419(7)  |
| C(14)-C(10)    | 1.52(2)    | C(3)-C(5)           | 1.553(19) |
| C(14)-C(10A)   | 1.52(2)    | C(3)-C(6)           | 1.56(2)   |
| C(15)-C(16)    | 1.425(5)   | C(10)-C(11)         | 1.515(18) |
| C(15)-C(16)#1  | 1.425(5)   | C(10)-C(12)         | 1.54(2)   |
| C(15)-P(3)     | 1.837(6)   | C(3A)-C(6A)         | 1.52(2)   |
| C(17)-C(18)    | 1.386(6)   | C(3A)-C(5A)         | 1.524(18) |
| C(17)-C(16)    | 1.394(7)   | C(10A)-C(12A)       | 1.531(19) |
| C(18)-C(17)#1  | 1.386(6)   | C(10A)-C(11A)       | 1.55(2)   |
| C(18)-C(23)    | 1.540(10)  | F(141)-C(38)        | 1.445(17) |
| C(19)-C(20)    | 1.528(8)   | F(101)-C(37)        | 1.328(14) |
| C(19)-C(21)    | 1.533(9)   | F(101)-C(37A)       | 1.402(13) |
| C(19)-C(22)    | 1.542(8)   | F(151)-C(38)        | 0.893(14) |
| C(19)-C(16)    | 1.551(6)   | F(151)-F(151)#2     | 1.07(3)   |
| C(23)-C(24)    | 1.512(13)  | F(151)-F(16)        | 1.140(17) |
| C(23)-C(26)    | 1.521(13)  | F(14)-F(15)         | 1.005(12) |
| C(23)-C(25)    | 1.529(14)  | F(16)-C(38)         | 1.32(2)   |
| C(27)-O(1)     | 1.419(7)   | F(11)-F(12)         | 1.762(17) |
| C(27)-C(28)    | 1.488(11)  | C(37)-F(42)         | 1.331(12) |
| C(29)-O(2)     | 1.294(9)   | C(37)-F(41)         | 1.352(13) |
| C(29)-O(2A)    | 1.365(9)   | F(42)-F(42)#2       | 1.45(2)   |
| C(29)-C(31)    | 1.502(14)  | F(42A)-C(37A)       | 1.355(12) |
| C(29)-C(30A)   | 1.508(17)  | C(37A)-F(41A)       | 1.333(13) |
| C(29)-C(32)    | 1.543(10)  | F(7)-C(31)          | 1.306(11) |
| C(29)-C(31A)   | 1.562(15)  | F(8)-C(31)          | 1.327(11) |
| C(29)-C(30)    | 1.578(17)  | F(9)-C(31)          | 1.309(12) |
| C(32)-F(1)     | 1.216(13)  | F(7A)-C(31A)        | 1.318(12) |
| C(32)-F(2A)    | 1.247(14)  | F(8A)-C(31A)        | 1.302(12) |
| C(32)-F(3A)    | 1.31(5)    | F(9A)-C(31A)        | 1.305(13) |
| C(32)-F(3)     | 1.34(5)    | C(30)-F(5)          | 1.284(13) |
| C(32)-F(2)     | 1.386(14)  | C(30)-F(6)          | 1.299(12) |
| C(32)-F(1A)    | 1.477(13)  | C(30)-F(4)          | 1.330(13) |
| C(33)-O(3)     | 1.306(7)   | C(30A)-F(4A)        | 1.293(13) |
| C(33)-C(35)    | 1.533(9)   | C(30A)-F(5A)        | 1.320(13) |
| C(33)-C(34)    | 1.555(8)   | C(30A)-F(6A)        | 1.350(13) |
| C(33)-C(34)#2  | 1.555(8)   | C(1)-N(1)-C(8)      | 115.1(5)  |
| C(34)-F(11A)   | 1.271(10)  | C(1)-N(1)-Os(1)     | 123.3(4)  |
| C(34)-F(10)    | 1.271(9)   | C(8)-N(1)-Os(1)     | 121.6(4)  |
| C(34)-F(12)    | 1.275(11)  | C(2)-C(1)-N(1)      | 122.1(6)  |
| C(34)-F(12A)   | 1.340(10)  | C(1)-C(2)-P(1)      | 114.7(5)  |
| C(34)-F(11)    | 1.402(10)  | C(9)-C(8)-N(1)      | 123.0(6)  |
| C(34)-F(10A)   | 1.433(9)   | C(8)-C(9)-P(2)      | 114.3(5)  |
| C(35)-F(14)    | 1.199(10)  | C(16)-C(15)-C(16)#1 | 118.4(6)  |
| C(35)-F(13)    | 1.299(9)   | C(16)-C(15)-P(3)    | 120.4(3)  |
| C(35)-F(15)    | 1.502(11)  | C(16)#1-C(15)-P(3)  | 120.4(3)  |
| C(36)-O(4)     | 1.316(9)   | C(18)-C(17)-C(16)   | 123.3(5)  |
| C(36)-C(37A)   | 1.454(18)  | C(17)-C(18)-C(17)#1 | 116.4(6)  |
| C(36)-C(37A)#2 | 1.454(18)  | C(17)-C(18)-C(23)   | 121.7(3)  |
| C(36)-C(37)    | 1.504(17)  | C(17)#1-C(18)-C(23) | 121.7(3)  |
| C(36)-C(37)#2  | 1.504(17)  | C(20)-C(19)-C(21)   | 105.5(5)  |
| C(36)-C(38)    | 1.554(13)  | C(20)-C(19)-C(22)   | 106.0(5)  |
| P(1)-C(3)      | 1.85(3)    | C(21)-C(19)-C(22)   | 108.8(5)  |
| P(1)-C(3)#1    | 1.85(3)    | C(20)-C(19)-C(16)   | 116.9(4)  |
| P(1)-C(3A)#1   | 1.90(3)    | C(21)-C(19)-C(16)   | 112.5(4)  |
| P(1)-C(3A)     | 1.90(3)    | C(22)-C(19)-C(16)   | 106.8(4)  |
| P(1)-Os(1)     | 2.4011(15) | C(24)-C(23)-C(26)   | 109.6(8)  |
| P(2)-C(10A)    | 1.85(2)    | C(24)-C(23)-C(25)   | 108.2(10) |
| P(2)-C(10A)#1  | 1.85(2)    | C(26)-C(23)-C(25)   | 109.7(11) |
| P(2)-C(10)#1   | 1.91(2)    | C(24)-C(23)-C(18)   | 108.5(7)  |
| P(2)-C(10)     | 1.91(2)    | C(26)-C(23)-C(18)   | 108.6(6)  |
| P(2)-Os(1)     | 2.3927(15) | C(25)-C(23)-C(18)   | 112.3(6)  |
| P(3)-Os(1)     | 2.1943(15) | O(1)-C(27)-C(28)    | 108.5(6)  |
|                |            | O(2)-C(29)-C(32)    | 102.2(6)  |

|                       |           |                       |            |
|-----------------------|-----------|-----------------------|------------|
| O(2A)-C(29)-C(32)     | 113.5(6)  | Os(1)-P(3)-H(11)      | 124(3)     |
| C(31)-C(29)-C(32)     | 104.3(6)  | N(1)-Os(1)-P(3)       | 175.14(15) |
| C(30A)-C(29)-C(32)    | 110.9(8)  | N(1)-Os(1)-P(2)       | 81.03(15)  |
| C(32)-C(29)-C(31A)    | 114.2(7)  | P(3)-Os(1)-P(2)       | 94.11(6)   |
| C(32)-C(29)-C(30)     | 111.1(7)  | N(1)-Os(1)-P(1)       | 80.00(15)  |
| F(2A)-C(32)-F(3A)     | 111.5(17) | P(3)-Os(1)-P(1)       | 104.86(6)  |
| F(1)-C(32)-F(3)       | 125(2)    | P(2)-Os(1)-P(1)       | 161.03(5)  |
| F(1)-C(32)-F(2)       | 110.9(12) | N(1)-Os(1)-H(111)     | 93(4)      |
| F(3)-C(32)-F(2)       | 93.9(14)  | P(3)-Os(1)-H(111)     | 87(4)      |
| F(2A)-C(32)-F(1A)     | 101.9(11) | P(2)-Os(1)-H(111)     | 91(4)      |
| F(3A)-C(32)-F(1A)     | 97(2)     | P(1)-Os(1)-H(111)     | 90(4)      |
| F(1)-C(32)-C(29)      | 109.6(9)  | O(2A)#2-Al(1)-O(2A)   | 128.3(6)   |
| F(2A)-C(32)-C(29)     | 118.3(11) | O(2A)#2-Al(1)-O(4)    | 102.3(3)   |
| F(3A)-C(32)-C(29)     | 115.8(18) | O(2A)-Al(1)-O(4)      | 102.3(3)   |
| F(3)-C(32)-C(29)      | 106.4(15) | O(2A)#2-Al(1)-O(3)    | 107.1(3)   |
| F(2)-C(32)-C(29)      | 109.8(9)  | O(2A)-Al(1)-O(3)      | 107.1(3)   |
| F(1A)-C(32)-C(29)     | 109.3(8)  | O(4)-Al(1)-O(3)       | 108.4(3)   |
| O(3)-C(33)-C(35)      | 110.9(6)  | O(4)-Al(1)-O(2)       | 118.7(3)   |
| O(3)-C(33)-C(34)      | 111.2(4)  | O(3)-Al(1)-O(2)       | 111.6(3)   |
| C(35)-C(33)-C(34)     | 108.3(4)  | O(4)-Al(1)-O(2)#2     | 118.7(3)   |
| O(3)-C(33)-C(34)#2    | 111.2(4)  | O(3)-Al(1)-O(2)#2     | 111.6(3)   |
| C(35)-C(33)-C(34)#2   | 108.3(4)  | O(2)-Al(1)-O(2)#2     | 86.5(6)    |
| C(34)-C(33)-C(34)#2   | 106.8(6)  | C(27)-O(1)-C(27)#1    | 112.8(7)   |
| F(10)-C(34)-F(12)     | 119.6(11) | C(33)-O(3)-Al(1)      | 151.5(5)   |
| F(11A)-C(34)-F(12A)   | 130.7(9)  | C(36)-O(4)-Al(1)      | 154.0(6)   |
| F(10)-C(34)-F(11)     | 104.6(9)  | C(4)-C(3)-C(5)        | 109.9(16)  |
| F(12)-C(34)-F(11)     | 82.2(8)   | C(4)-C(3)-C(6)        | 106.6(14)  |
| F(11A)-C(34)-F(10A)   | 101.7(8)  | C(5)-C(3)-C(6)        | 105.4(15)  |
| F(12A)-C(34)-F(10A)   | 86.2(7)   | C(4)-C(3)-P(1)        | 115.8(14)  |
| F(11A)-C(34)-C(33)    | 113.8(7)  | C(5)-C(3)-P(1)        | 106.2(13)  |
| F(10)-C(34)-C(33)     | 114.8(6)  | C(6)-C(3)-P(1)        | 112.5(15)  |
| F(12)-C(34)-C(33)     | 121.5(9)  | C(11)-C(10)-C(14)     | 108.2(14)  |
| F(12A)-C(34)-C(33)    | 110.5(7)  | C(11)-C(10)-C(12)     | 107.8(14)  |
| F(11)-C(34)-C(33)     | 103.9(6)  | C(14)-C(10)-C(12)     | 111.7(14)  |
| F(10A)-C(34)-C(33)    | 105.2(6)  | C(11)-C(10)-P(2)      | 105.4(12)  |
| F(14)-C(35)-F(13)     | 117.7(7)  | C(14)-C(10)-P(2)      | 110.1(11)  |
| F(14)-C(35)-F(15)     | 41.8(5)   | C(12)-C(10)-P(2)      | 113.3(13)  |
| F(13)-C(35)-F(15)     | 96.2(6)   | C(6A)-C(3A)-C(5A)     | 109.3(14)  |
| F(14)-C(35)-C(33)     | 117.4(7)  | C(6A)-C(3A)-C(4)      | 113.4(15)  |
| F(13)-C(35)-C(33)     | 115.1(7)  | C(5A)-C(3A)-C(4)      | 107.5(16)  |
| F(15)-C(35)-C(33)     | 102.7(5)  | C(6A)-C(3A)-P(1)      | 113.8(16)  |
| O(4)-C(36)-C(37A)     | 103.7(6)  | C(5A)-C(3A)-P(1)      | 104.1(13)  |
| O(4)-C(36)-C(37A)#2   | 103.7(6)  | C(4)-C(3A)-P(1)       | 108.2(12)  |
| C(37A)-C(36)-C(37A)#2 | 127.9(11) | C(14)-C(10A)-C(12A)   | 110.2(14)  |
| O(4)-C(36)-C(37)      | 119.5(6)  | C(14)-C(10A)-C(11A)   | 105.3(13)  |
| O(4)-C(36)-C(37)#2    | 119.5(6)  | C(12A)-C(10A)-C(11A)  | 108.2(14)  |
| C(37)-C(36)-C(37)#2   | 89.3(10)  | C(14)-C(10A)-P(2)     | 113.6(12)  |
| O(4)-C(36)-C(38)      | 109.5(7)  | C(12A)-C(10A)-P(2)    | 106.8(12)  |
| C(2)-P(1)-C(3)        | 103.4(8)  | C(11A)-C(10A)-P(2)    | 112.5(13)  |
| C(2)-P(1)-C(3)#1      | 103.4(8)  | C(38)-F(151)-F(151)#2 | 85.8(17)   |
| C(3)-P(1)-C(3)#1      | 101.9(9)  | C(38)-F(151)-F(16)    | 80.2(17)   |
| C(2)-P(1)-C(3A)#1     | 101.4(8)  | F(151)#2-F(151)-F(16) | 159.9(8)   |
| C(2)-P(1)-C(3A)       | 101.4(8)  | F(15)-F(14)-C(35)     | 85.5(9)    |
| C(3A)#1-P(1)-C(3A)    | 122.6(10) | F(14)-F(15)-C(35)     | 52.7(8)    |
| C(2)-P(1)-Os(1)       | 99.9(2)   | C(17)-C(16)-C(15)     | 118.0(4)   |
| C(3)-P(1)-Os(1)       | 122.5(6)  | C(17)-C(16)-C(19)     | 114.7(4)   |
| C(3)#1-P(1)-Os(1)     | 122.5(6)  | C(15)-C(16)-C(19)     | 126.9(4)   |
| C(3A)#1-P(1)-Os(1)    | 113.4(5)  | F(151)-F(16)-C(38)    | 41.7(10)   |
| C(3A)-P(1)-Os(1)      | 113.4(5)  | F(151)-C(38)-F(16)    | 58.1(13)   |
| C(9)-P(2)-C(10A)      | 101.8(7)  | F(151)-C(38)-F(141)   | 106.6(16)  |
| C(9)-P(2)-C(10A)#1    | 101.8(7)  | F(16)-C(38)-F(141)    | 126.6(11)  |
| C(10A)-P(2)-C(10A)#1  | 102.8(10) | F(151)-C(38)-C(36)    | 138.7(14)  |
| C(9)-P(2)-C(10)#1     | 101.9(7)  | F(16)-C(38)-C(36)     | 118.1(14)  |
| C(9)-P(2)-C(10)       | 101.9(7)  | F(141)-C(38)-C(36)    | 105.3(10)  |
| C(10)#1-P(2)-C(10)    | 123.6(10) | C(29)-O(2)-Al(1)      | 152.4(6)   |
| C(9)-P(2)-Os(1)       | 100.1(2)  | C(34)-F(11)-F(12)     | 45.8(5)    |
| C(10A)-P(2)-Os(1)     | 123.0(5)  | C(34)-F(12)-F(11)     | 52.0(6)    |
| C(10A)#1-P(2)-Os(1)   | 123.0(5)  | C(29)-O(2A)-Al(1)     | 149.6(6)   |
| C(10)#1-P(2)-Os(1)    | 112.5(5)  | F(101)-C(37)-F(42)    | 99.9(11)   |
| C(10)-P(2)-Os(1)      | 112.5(5)  | F(101)-C(37)-F(41)    | 98.0(11)   |
| C(15)-P(3)-Os(1)      | 137.4(2)  | F(42)-C(37)-F(41)     | 110.2(12)  |
| C(15)-P(3)-H(11)      | 99(3)     | F(101)-C(37)-C(36)    | 110.9(10)  |



|                      |           |                            |            |
|----------------------|-----------|----------------------------|------------|
| F(42)-C(37)-C(36)    | 116.4(11) | C(34)#2-C(33)-C(34)-F(12A) | 47.3(9)    |
| F(41)-C(37)-C(36)    | 118.3(11) | O(3)-C(33)-C(34)-F(11)     | -80.8(8)   |
| C(37)-F(42)-F(42)#2  | 104.5(8)  | C(35)-C(33)-C(34)-F(11)    | 41.2(8)    |
| F(41A)-C(37A)-F(42A) | 106.6(11) | C(34)#2-C(33)-C(34)-F(11)  | 157.6(6)   |
| F(41A)-C(37A)-F(101) | 111.2(11) | O(3)-C(33)-C(34)-F(10A)    | 77.2(7)    |
| F(42A)-C(37A)-F(101) | 110.2(11) | C(35)-C(33)-C(34)-F(10A)   | -160.7(6)  |
| F(41A)-C(37A)-C(36)  | 109.1(11) | C(34)#2-C(33)-C(34)-F(10A) | -44.3(8)   |
| F(42A)-C(37A)-C(36)  | 110.1(12) | O(3)-C(33)-C(35)-F(14)     | -34.9(6)   |
| F(101)-C(37A)-C(36)  | 109.7(10) | C(34)-C(33)-C(35)-F(14)    | -157.2(7)  |
| F(7)-C(31)-F(9)      | 111.8(11) | C(34)#2-C(33)-C(35)-F(14)  | 87.4(8)    |
| F(7)-C(31)-F(8)      | 105.1(10) | O(3)-C(33)-C(35)-F(13)     | 180.000(1) |
| F(9)-C(31)-F(8)      | 104.3(10) | C(34)-C(33)-C(35)-F(13)    | 57.7(4)    |
| F(7)-C(31)-C(29)     | 106.9(9)  | C(34)#2-C(33)-C(35)-F(13)  | -57.7(4)   |
| F(9)-C(31)-C(29)     | 116.2(9)  | O(3)-C(33)-C(35)-F(15)     | -76.8(6)   |
| F(8)-C(31)-C(29)     | 112.1(10) | C(34)-C(33)-C(35)-F(15)    | 160.9(7)   |
| F(8A)-C(31A)-F(9A)   | 106.4(12) | C(34)#2-C(33)-C(35)-F(15)  | 45.5(8)    |
| F(8A)-C(31A)-F(7A)   | 106.6(11) | C(1)-C(2)-P(1)-C(3)        | 127.0(5)   |
| F(9A)-C(31A)-F(7A)   | 101.4(11) | C(1)-C(2)-P(1)-C(3)#1      | -127.0(5)  |
| F(8A)-C(31A)-C(29)   | 116.3(11) | C(1)-C(2)-P(1)-C(3A)#1     | -116.5(5)  |
| F(9A)-C(31A)-C(29)   | 106.0(10) | C(1)-C(2)-P(1)-C(3A)       | 116.5(5)   |
| F(7A)-C(31A)-C(29)   | 118.5(11) | C(1)-C(2)-P(1)-Os(1)       | 0.000(1)   |
| F(5)-C(30)-F(6)      | 112.4(12) | C(8)-C(9)-P(2)-C(10A)      | 127.0(5)   |
| F(5)-C(30)-F(4)      | 105.7(12) | C(8)-C(9)-P(2)-C(10A)#1    | -127.0(5)  |
| F(6)-C(30)-F(4)      | 106.4(12) | C(8)-C(9)-P(2)-C(10)#1     | -115.7(5)  |
| F(5)-C(30)-C(29)     | 111.6(12) | C(8)-C(9)-P(2)-C(10)       | 115.7(5)   |
| F(6)-C(30)-C(29)     | 111.3(11) | C(8)-C(9)-P(2)-Os(1)       | 0.000(1)   |
| F(4)-C(30)-C(29)     | 109.1(11) | C(16)-C(15)-P(3)-Os(1)     | -84.7(4)   |
| F(4A)-C(30A)-F(5A)   | 105.7(12) | C(16)#1-C(15)-P(3)-Os(1)   | 84.7(4)    |
| F(4A)-C(30A)-F(6A)   | 104.8(12) | C(28)-C(27)-O(1)-C(27)#1   | 169.6(5)   |
| F(5A)-C(30A)-F(6A)   | 105.0(12) | C(35)-C(33)-O(3)-Al(1)     | 180.000(1) |
| F(4A)-C(30A)-C(29)   | 114.6(12) | C(34)-C(33)-O(3)-Al(1)     | -59.5(4)   |
| F(5A)-C(30A)-C(29)   | 114.1(12) | C(34)#2-C(33)-O(3)-Al(1)   | 59.5(4)    |
| F(6A)-C(30A)-C(29)   | 111.8(11) | O(2A)#2-Al(1)-O(3)-C(33)   | -109.7(3)  |

Symmetry transformations used to generate equivalent atoms:

#1 x, -y+3/2, z #2 x, -y+1/2, z

**Table S19.** Torsion angles [°] for **9**.

|                            |            |                             |            |
|----------------------------|------------|-----------------------------|------------|
| C(8)-N(1)-C(1)-C(2)        | 180.000(1) | O(4)-Al(1)-O(3)-C(33)       | 0.000(2)   |
| Os(1)-N(1)-C(1)-C(2)       | 0.000(1)   | O(2)-Al(1)-O(3)-C(33)       | 132.5(3)   |
| N(1)-C(1)-C(2)-P(1)        | 0.000(1)   | O(2)#2-Al(1)-O(3)-C(33)     | -132.5(3)  |
| C(1)-N(1)-C(8)-C(9)        | 180.000(1) | C(37A)-C(36)-O(4)-Al(1)     | -67.6(6)   |
| Os(1)-N(1)-C(8)-C(9)       | 0.000(2)   | C(37A)#2-C(36)-O(4)-Al(1)   | 67.6(6)    |
| N(1)-C(8)-C(9)-P(2)        | 0.000(2)   | C(37)-C(36)-O(4)-Al(1)      | -53.8(7)   |
| C(16)-C(17)-C(18)-C(17)#1  | 10.0(9)    | C(37)#2-C(36)-O(4)-Al(1)    | 53.8(7)    |
| C(16)-C(17)-C(18)-C(23)    | -173.2(6)  | C(38)-C(36)-O(4)-Al(1)      | -161.3(8)  |
| C(17)-C(18)-C(23)-C(24)    | -66.3(9)   | O(2A)#2-Al(1)-O(4)-C(36)    | -67.1(3)   |
| C(17)#1-C(18)-C(23)-C(24)  | 110.3(8)   | O(2A)-Al(1)-O(4)-C(36)      | 67.1(3)    |
| C(17)-C(18)-C(23)-C(26)    | 52.8(10)   | O(3)-Al(1)-O(4)-C(36)       | 180.000(3) |
| C(17)#1-C(18)-C(23)-C(26)  | -130.7(8)  | O(2)-Al(1)-O(4)-C(36)       | 51.4(3)    |
| C(17)-C(18)-C(23)-C(25)    | 174.2(9)   | O(2)#2-Al(1)-O(4)-C(36)     | -51.4(3)   |
| C(17)#1-C(18)-C(23)-C(25)  | -9.2(12)   | C(2)-P(1)-C(3)-C(4)         | 176.3(9)   |
| O(2)-C(29)-C(32)-F(1)      | 65.8(14)   | C(3)#1-P(1)-C(3)-C(4)       | 69.3(16)   |
| O(2A)-C(29)-C(32)-F(2A)    | 159.1(14)  | Os(1)-P(1)-C(3)-C(4)        | -72.5(10)  |
| O(2A)-C(29)-C(32)-F(3A)    | -65(2)     | C(2)-P(1)-C(3)-C(5)         | -61.4(14)  |
| O(2)-C(29)-C(32)-F(3)      | -71.7(18)  | C(3)#1-P(1)-C(3)-C(5)       | -168.5(6)  |
| O(2)-C(29)-C(32)-F(2)      | -172.1(9)  | Os(1)-P(1)-C(3)-C(5)        | 49.7(17)   |
| O(2A)-C(29)-C(32)-F(1A)    | 43.2(10)   | C(2)-P(1)-C(3)-C(6)         | 53.5(12)   |
| O(3)-C(33)-C(34)-F(11A)    | -33.3(9)   | C(3)#1-P(1)-C(3)-C(6)       | -54(2)     |
| C(35)-C(33)-C(34)-F(11A)   | 88.8(8)    | Os(1)-P(1)-C(3)-C(6)        | 164.6(8)   |
| C(34)#2-C(33)-C(34)-F(11A) | -154.8(6)  | C(9)-P(2)-C(10A)-C(14)      | -177.1(8)  |
| O(3)-C(33)-C(34)-F(10)     | 32.8(9)    | C(10A)#1-P(2)-C(10A)-C(14)  | 77.8(13)   |
| C(35)-C(33)-C(34)-F(10)    | 154.9(7)   | Os(1)-P(2)-C(10A)-C(14)     | -66.7(11)  |
| C(34)#2-C(33)-C(34)-F(10)  | -88.8(8)   | C(9)-P(2)-C(10A)-C(12A)     | -55.3(12)  |
| O(3)-C(33)-C(34)-F(12)     | -170.1(9)  | C(10A)#1-P(2)-C(10A)-C(12A) | -160.5(6)  |
| C(35)-C(33)-C(34)-F(12)    | -48.0(10)  | Os(1)-P(2)-C(10A)-C(12A)    | 55.1(15)   |
| C(34)#2-C(33)-C(34)-F(12)  | 68.4(10)   | C(9)-P(2)-C(10A)-C(11A)     | 63.3(12)   |
| O(3)-C(33)-C(34)-F(12A)    | 168.9(6)   | C(10A)#1-P(2)-C(10A)-C(11A) | -41.8(19)  |
| C(35)-C(33)-C(34)-F(12A)   | -69.1(7)   | Os(1)-P(2)-C(10A)-C(11A)    | 173.7(8)   |
|                            |            | F(13)-C(35)-F(14)-F(15)     | 66.3(10)   |
|                            |            | C(33)-C(35)-F(14)-F(15)     | -78.0(9)   |
|                            |            | F(13)-C(35)-F(15)-F(14)     | -125.4(10) |
|                            |            | C(33)-C(35)-F(15)-F(14)     | 117.1(10)  |
|                            |            | C(18)-C(17)-C(16)-C(15)     | 2.3(7)     |
|                            |            | C(18)-C(17)-C(16)-C(19)     | -171.4(5)  |
|                            |            | C(16)#1-C(15)-C(16)-C(17)   | -14.9(8)   |

|                              |            |                              |            |
|------------------------------|------------|------------------------------|------------|
| P(3)-C(15)-C(16)-C(17)       | 154.8(4)   | O(4)-C(36)-C(37)-F(101)      | 38.7(12)   |
| C(16)#1-C(15)-C(16)-C(19)    | 157.9(4)   | C(37)#2-C(36)-C(37)-F(101)   | -85.2(10)  |
| P(3)-C(15)-C(16)-C(19)       | -32.4(7)   | O(4)-C(36)-C(37)-F(42)       | 152.0(9)   |
| C(20)-C(19)-C(16)-C(17)      | -179.9(5)  | C(37)#2-C(36)-C(37)-F(42)    | 28.1(15)   |
| C(21)-C(19)-C(16)-C(17)      | -57.6(6)   | O(4)-C(36)-C(37)-F(41)       | -73.2(13)  |
| C(22)-C(19)-C(16)-C(17)      | 61.6(6)    | C(37)#2-C(36)-C(37)-F(41)    | 162.8(7)   |
| C(20)-C(19)-C(16)-C(15)      | 7.0(8)     | F(101)-C(37)-F(42)-F(42)#2   | 99.2(9)    |
| C(21)-C(19)-C(16)-C(15)      | 129.4(5)   | F(41)-C(37)-F(42)-F(42)#2    | -158.5(9)  |
| C(22)-C(19)-C(16)-C(15)      | -111.4(6)  | C(36)-C(37)-F(42)-F(42)#2    | -20.2(11)  |
| F(151)#2-F(151)-F(16)-C(38)  | 47(2)      | O(4)-C(36)-C(37A)-F(41A)     | -46.7(10)  |
| F(151)#2-F(151)-C(38)-F(16)  | -165.5(8)  | C(37A)#2-C(36)-C(37A)-F(41A) | -166.6(7)  |
| F(151)#2-F(151)-C(38)-F(141) | 71.4(12)   | O(4)-C(36)-C(37A)-F(42A)     | -163.3(9)  |
| F(16)-F(151)-C(38)-F(141)    | -123.1(15) | C(37A)#2-C(36)-C(37A)-F(42A) | 76.8(16)   |
| F(151)#2-F(151)-C(38)-C(36)  | -68(3)     | O(4)-C(36)-C(37A)-F(101)     | 75.3(9)    |
| F(16)-F(151)-C(38)-C(36)     | 98(3)      | C(37A)#2-C(36)-C(37A)-F(101) | -44.5(17)  |
| F(151)-F(16)-C(38)-F(141)    | 87.6(18)   | C(32)-C(29)-C(31)-F(7)       | 164.9(8)   |
| F(151)-F(16)-C(38)-C(36)     | -132.2(17) | C(32)-C(29)-C(31)-F(9)       | -69.6(10)  |
| O(4)-C(36)-C(38)-F(151)      | -21(4)     | C(32)-C(29)-C(31)-F(8)       | 50.2(10)   |
| O(4)-C(36)-C(38)-F(16)       | 51.9(15)   | C(32)-C(29)-C(31A)-F(8A)     | 55.8(13)   |
| O(4)-C(36)-C(38)-F(141)      | -160.3(8)  | C(32)-C(29)-C(31A)-F(9A)     | -62.1(11)  |
| C(32)-C(29)-O(2)-Al(1)       | 85.8(16)   | C(32)-C(29)-C(31A)-F(7A)     | -175.0(10) |
| O(4)-Al(1)-O(2)-C(29)        | 77.3(16)   | C(32)-C(29)-C(30)-F(5)       | 169.5(9)   |
| O(3)-Al(1)-O(2)-C(29)        | -49.8(16)  | C(32)-C(29)-C(30)-F(6)       | -64.0(12)  |
| O(2)#2-Al(1)-O(2)-C(29)      | -161.7(13) | C(32)-C(29)-C(30)-F(4)       | 53.1(11)   |
| F(10)-C(34)-F(11)-F(12)      | 118.6(11)  | C(32)-C(29)-C(30A)-F(4A)     | 69.4(13)   |
| C(33)-C(34)-F(11)-F(12)      | -120.6(10) | C(32)-C(29)-C(30A)-F(5A)     | -168.6(10) |
| F(10)-C(34)-F(12)-F(11)      | -102.4(11) | C(32)-C(29)-C(30A)-F(6A)     | -49.7(13)  |
| C(33)-C(34)-F(12)-F(11)      | 101.5(9)   |                              |            |
| C(32)-C(29)-O(2A)-Al(1)      | -41.9(15)  |                              |            |
| O(2A)#2-Al(1)-O(2A)-C(29)    | -51.8(17)  |                              |            |
| O(4)-Al(1)-O(2A)-C(29)       | -168.4(12) |                              |            |
| O(3)-Al(1)-O(2A)-C(29)       | 77.7(13)   |                              |            |

---

Symmetry transformations used to generate equivalent atoms:

#1 x,-y+3/2,z #2 x,-y+1/2,z

## Computational Details

DFT calculations were carried out with the ORCA 4.0.1.2<sup>[10]</sup> program package using the PBE<sup>[11]</sup> and PBE0<sup>[12]</sup> functionals, respectively. Ahlrichs' basis sets def2-SVP (for geometry optimization and frequency calculation) and def2-TZVP (for single-point energies) were used with a full basis for all elements but Os and Ni for which the Stuttgart-Dresden 60 electron core potential was chosen to replace the inner shell 1s-4f orbitals.<sup>[13,14]</sup> The RI-J<sup>[15]</sup> (PBE) approximation in combination with the corresponding auxiliary basis sets of Ahlrichs' was utilized to reduce computational costs in the geometry optimization and frequency calculations. Grimme's model (D3) with Becke-Johnson damping<sup>[16]</sup> was used to account for dispersion with the PBE or PBE0 functionals. No symmetry restraints were imposed and the optimized structures were defined as minima (no negative eigenvalues) by vibrational analyses. Geometries were analyzed and visualized with Avogadro<sup>[17]</sup>, QRO-molecular orbitals were visualized with Chimera<sup>[18]</sup>.

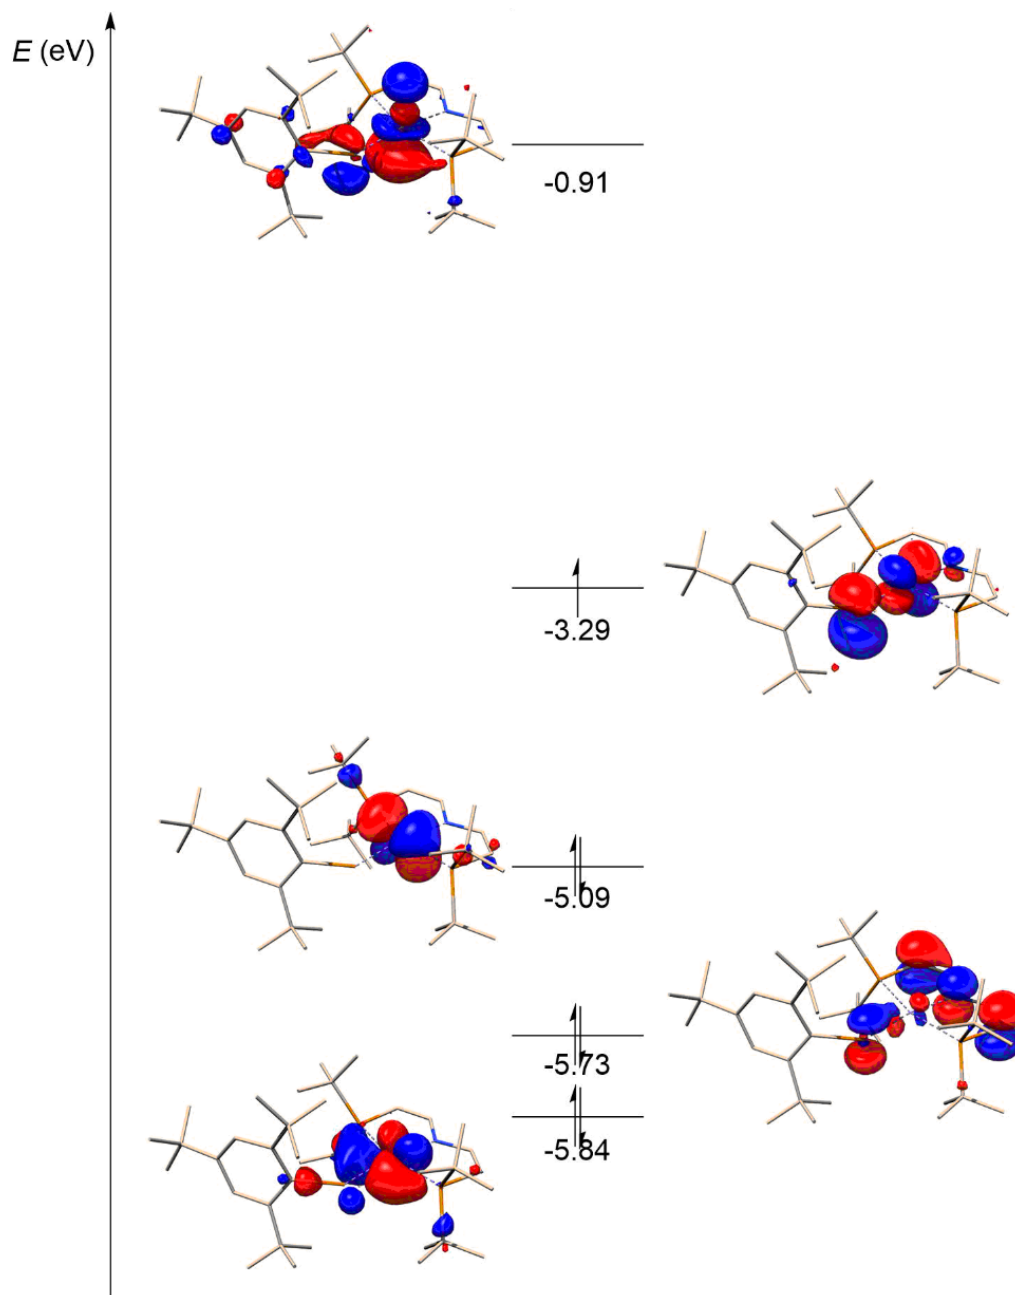

**Figure S32.** Frontier molecular orbital scheme (quasi-restricted orbitals) of **5** (D3BJ-PBE0-RIJCOSX/def2-TZVP//D3BJ-PBE-RI/def2-SVP).

## BDE calculations

Geometry optimizations were carried out with the Turbomole program package<sup>19</sup> coupled to the PQS Baker optimizer<sup>20</sup> via the BOpt package,<sup>21</sup> at the spin unrestricted ri-DFT level using the BP86 functional<sup>22</sup> and the resolution-of-identity (ri) method.<sup>23</sup> We used the def2-TZVP basis set<sup>24</sup> (small-core pseudopotentials on Os<sup>25</sup>) and Grimme's version 3 dispersion corrections (disp3, "zero damping")<sup>26</sup> for all geometry optimizations. Scalar relativistic effects were included implicitly through the use of the Os ECPs. All minima (no imaginary frequencies) were characterized by calculating the Hessian matrix. ZPE and gas-phase thermal corrections (entropy and enthalpy, 298 K, 1 bar) from these analyses were calculated. Spectroscopic properties and BDEs were evaluated using the full atom model of the complexes. The optimized geometries of all species are supplied as separate files in .pdb and .xyz format. The calculated BDEs were calibrated (taking advantage of internal error cancellation) against the known experimental BDE of propene, using the following Hess cycle:

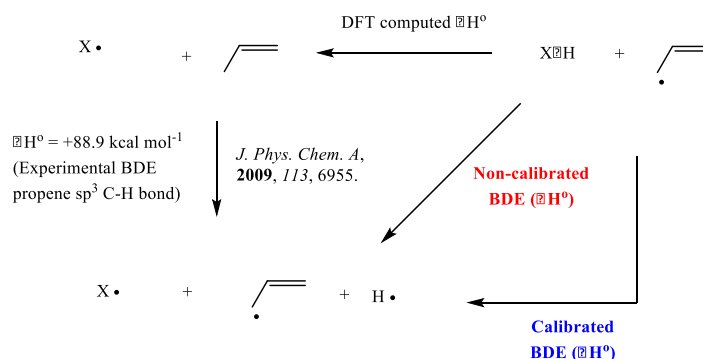

This resulted in the DFT calculated BDEs for the P–H and Os–H bonds of complex **5** shown in Table S20.

**Table S20.** Calibrated and uncalibrated DFT calculated BDEs ( $\Delta H^\circ$  in kcal mol<sup>-1</sup>) of the P–H and Os–H bonds of complex **5**.

| Bond type | Uncalibrated BDEs | Calibrated BDEs |
|-----------|-------------------|-----------------|
| P–H       | +64.0             | +67.5           |
| Os–H      | +70.1             | +73.6           |

## EPR Property calculations

EPR parameters<sup>27</sup> of **5** were calculated with the ADF<sup>28</sup> program system at the B3LYP/ZORA/QZ4P level, using the coordinates from the structure optimized in Turbomole as input. Unrestricted SPINORBIT ZORA COLLINEAR calculations were used to compute the SOC corrected HFI-tensors and Zeeman corrected g-tensors.

- [1] a) J. Abbenseth, M. Diefenbach, S. C. Bete, C. Würtele, C. Volkman, S. Demeshko, M. C. Holthausen, S. Schneider *Chem. Commun.* **2017**, 29, 867; b) V. W. Manner, T. F. Markle, J. H. Freudenthal, J. P. Roth, J. J. Mayer *Chem Commun.* **2008**, 256.
- [2] S. K. Sur, *J. Magn. Reson.* **1989**, 82, 169.
- [3] W95EPR; An EPR simulation program for windows. F. Neese, Diploma thesis, University of Konstanz (Konstanz, Germany), **1993**.
- [4] J. J. Warren, T. A. Tronic, J. A. Mayer, *Chem. Rev.* **2010**, 6961–7001.
- [5] a) Measurement by ITCRun Version 3.4.6.0, TA Instruments, **2017**. b) Evaluation by NanoAnalyze Version 3.7.5 TA Instruments, **2015**.
- [6] E. P. Cappellani, S. D. Drouin, G. Jia, P. A. Maltby, R. H. Morris and C. T. Schweitzer, *J. Am. Chem. Soc.*, **1994**, 116, 3375–3388.
- [7] F. G. Bordwell and J. Cheng, *J. Am. Chem. Soc.*, **1991**, 113, 1736–1743.
- [8] F. Ding, J. M. Smith, H. Wang, *J. Org. Chem.* **2009**, 74, 2679–2691.
- [9] (a) APEX3 v2016.9-0 (SAINT/SADABS/SHELXT/SHELXL), Bruker AXS Inc., Madison, WI, USA, **2016**. (b) George M. Sheldrick, *Acta Cryst.* **2015**, A71, 3. (c) George M. Sheldrick, *Acta Cryst.* **2015**, C71, 3. (d) George M. Sheldrick, *Acta Cryst.* **2008**, A64, 112.
- [10] F. Neese, *WIREs Comput. Mol. Sci.* **2012**, 2, 73.
- [11] J. P. Perdew, K. Burke, M. Ernzerhof, *Phys. Rev. Lett.* **1996**, 77, 3865.
- [12] J. P. Perdew, K. Burke, M. Ernzerhof, *J. Chem. Phys.* **1996**, 105, 9982.
- [13] F. Weigend, R. Ahlrichs, *Phys. Chem. Chem. Phys.* **2005**, 7, 3297.
- [14] D. Andrae, U. Häussermann, M. Dolg, H. Stoll, H. Preuss, *Theor. Chim. Acta* **1990**, 77, 123.
- [15] (a) O. Treutler, R. Ahlrichs, *J. Chem. Phys.* **1995**, 102, 346; (b) *Chem. Phys. Lett.* **1995**, 240, 283; (c) *Chem. Phys. Lett.* **1995**, 242, 652; (d) K. Eichkorn, F. Weigend, O. Treutler, R. Ahlrichs *Theo. Chem. Acc.* **1997**, 97, 119.
- [16] (a) S. Grimme, S. Ehrlich, L. Goerigk, *J. Comput. Chem.* **2011**, 32, 1456; (b) S. Grimme, J. Antony, S. Ehrlich, H. Krieg, *J. Chem. Phys.* **2010**, 132, 154104.
- [17] M. D. Hanwell, D. E. Curtis, D. C. Lonie, T. Vandermeersch, E. Zurek, G. R. Hutchison, *J. Cheminform.* **2012**, 4, 17.
- [18] Pettersen, E. F.; Goddard, T. D.; Huang, C. C.; Couch, G. S.; Greenblatt, D. M.; Meng, E. C.; Ferrin, T. E. *J. Comput. Chem.* **2004**, 25, 1605.
- [19] R. Ahlrichs, Turbomole Version 7.3.1, 2018, Theoretical Chemistry Group, University of Karlsruhe.
- [20] PQS version 2.4, 2001, Parallel Quantum Solutions, Fayetteville, Arkansas (USA); the Baker optimizer is available separately from PQS upon request: I. Baker, *J. Comput. Chem.* **1986**, 7, 385–395.
- [21] P. H. M. Budzelaar, *J. Comput. Chem.* **2007**, 28, 2226–2236.
- [22] (a) A. D. Becke, *Phys. Rev. A*, **1988**, 38, 3098–3100. (b) J. P. Perdew, *Phys. Rev. B*, **1986**, 33, 8822–8824.
- [23] M. Sierka, A. Hogekamp, R. Ahlrichs, *J. Chem. Phys.* **2003**, 118, 9136–9148.
- [24] (a) F. Weigend, R. Ahlrichs, *Phys. Chem. Chem. Phys.* **2005**, 7, 3297–3305. (b) F. Weigend, M. Häser, H. Patzelt, R. Ahlrichs, *Chem. Phys. Lett.* **1998**, 294, 143–152.
- [25] (a) Turbomole basisset library, Turbomole Version 6.5. (b) D. Andrae, U. Häussermann, M. Dolg, H. Stoll, H. Preuss, *Theor. Chim. Acta* **1990**, 77, 123–141.
- [26] S. Grimme, J. Antony, S. Ehrlich, H. Krieg, *J. Chem. Phys.* **2010**, 132, 154104.

- [27] Lead reference for calculation of g-tensor (Zeeman interactions) parameters: E. van Lenthe, A. van der Avoird, P. E. S. Wormer, *J. Chem. Phys.* **1997**, *107*, 2488. Lead reference for calculation of A-tensor (Nuclear magnetic dipole hyperfine interactions) parameters: E. van Lenthe, A. van der Avoird, P. E. S. Wormer, *J. Chem. Phys.* **1998**, *108*, 4783.
- [28] ADF2018: (a) E.J. Baerends, D. E. Ellis, P. Ros, *Chem. Phys.* **1973**, *2*, 41. (b) L. Versluis, T. Ziegler, *J. Chem. Phys.*, **1988**, *88*, 322. (c) G. te Velde, E. J. Baerends, *J. Comput. Phys.* **1992**, *99*, 84. (d) C. Fonseca Guerra, J. G. Snijders, G. te Velde, E. J. Baerends, *Theor. Chem. Acc.* **1998**, *99*, 391.
